# Supplementary material for: Mendelian Randomization Analysis of the Relationship between Neurotransmitter-Related Genes and Cancer: Insights from Multi-omics Data
Source: Research Square preprint supplement (doi:10.21203/rs.3.rs-6036757/v1), 2025-04-24
Supplement: Supplementary file 1 [file 05e1d49b3fcbf4633eed8c39.xlsx]

## Sheet: gtex_smr_adj
Outco_ID	probeID	ProbeChr	Gene	Probe_bp	topSNP	topSNP_chr	topSNP_bp	A1	A2	Freq	b_GWAS	se_GWAS	p_GWAS	b_eQTL	se_eQTL	p_eQTL	b_SMR	se_SMR	p_SMR	p_SMR_multi	p_HEIDI	nsnp_HEIDI
BRCA	ENSG00000188906	12	LRRK2	40590546	rs1491942	12	40620808	G	C	0.185885	0.00352871	0.00094348	0.000183947	0.298701	0.0304889	1.15916e-22	0.0118135	0.00338095	0.00047559	0.000399861	0.621385	20
BRCA	ENSG00000071967	2	CYBRD1	172378757	rs72884400	2	172415113	A	G	0.241551	0.00280264	0.000875526	0.00136907	-0.409752	0.0253459	8.70726e-59	-0.00683985	0.00217821	0.00168875	0.000443802	0.149414	20
BRCA	ENSG00000127990	7	SGCE	94214542	rs1878588	7	94264048	G	A	0.712724	-0.00252928	0.000828167	0.00225759	-0.152176	0.0308236	7.93375e-07	0.0166208	0.0063993	0.00939658	0.00939658	0.13459	7
BRCA	ENSG00000203797	6	DDO	110712974	rs9384742	6	110736610	C	T	0.512922	-0.00131995	0.000760468	0.0826156	0.40534	0.0409182	3.91632e-23	-0.0032564	0.00190471	0.0873284	0.0138808	0.546457	20
BRCA	ENSG00000138031	2	ADCY3	25042038	rs6545776	2	25099357	C	A	0.427435	-0.00242315	0.000761091	0.00145363	0.165102	0.0204846	7.64148e-16	-0.0146767	0.00495645	0.00306515	0.0159666	0.531145	20
BRCA	ENSG00000186642	11	PDE2A	72287185	rs10898861	11	72352646	C	G	0.680915	-0.00221488	0.000817291	0.00672779	0.102497	0.0209496	9.95419e-07	-0.0216092	0.00911534	0.0177571	0.0177571	0.291628	8
BRCA	ENSG00000117450	1	PRDX1	45976708	rs17522918	1	45987574	A	C	0.082505	-0.00279951	0.00127425	0.0280214	-0.33	0.0295056	4.86706e-29	0.00848338	0.00393516	0.0311002	0.0193295	0.266427	20
BRCA	ENSG00000024048	6	UBR2	42531800	rs10948043	6	42663549	C	T	0.253479	0.00227278	0.000903781	0.0119118	0.158727	0.0261038	1.1973e-09	0.0143188	0.00616167	0.0201334	0.0201334	0.577282	20
BRCA	ENSG00000196549	3	MME	154741913	rs1608001	3	154676122	C	T	0.375746	-0.00203036	0.000765984	0.00803356	-0.107708	0.0230622	3.00745e-06	0.0188507	0.00817728	0.0211525	0.0211525	0.165834	7
BRCA	ENSG00000169972	1	PUSL1	1243947	rs34734423	1	1299633	G	C	0.0994036	0.00236237	0.0011612	0.0419091	-0.244103	0.0372995	5.97364e-11	-0.00967777	0.00498156	0.0520504	0.0263765	0.548074	20
BRCA	ENSG00000138829	5	FBN2	127593601	rs79268243	5	127915991	G	A	0.0815109	-0.00234737	0.00135923	0.0841703	1.53494	0.0848886	4.42787e-73	-0.00152929	0.000889554	0.0855849	0.0269746	0.236577	20
BRCA	ENSG00000112294	6	ALDH5A1	24495080	rs2744568	6	24483279	T	C	0.355865	0.000627327	0.000782783	0.422897	-0.170924	0.0196158	2.94397e-18	-0.00367022	0.00459905	0.424849	0.0276221	0.421256	20
BRCA	ENSG00000146469	6	VIP	153071933	rs4415166	6	153003428	G	A	0.0228628	-0.0021673	0.00231515	0.349202	-0.483676	0.053429	1.39487e-19	0.00448089	0.0048121	0.351764	0.028818	0.884393	11
BRCA	ENSG00000159339	1	PADI4	17634690	rs12737739	1	17660890	A	C	0.368787	-0.00164473	0.000783737	0.0358545	0.305092	0.0411047	1.15096e-13	-0.00539093	0.00266956	0.0434448	0.0307775	0.734811	20
BRCA	ENSG00000114354	3	TFG	100428205	rs114124529	3	100428356	G	A	0.0477137	-0.0055926	0.00263172	0.0335804	-0.438882	0.0635295	4.90415e-12	0.0127428	0.0062737	0.04224	0.0393877	0.470919	10
BRCA	ENSG00000206503	6	HLA-A	29909037	rs9260495	6	29920476	A	G	0.0795229	0.00213793	0.00141632	0.131172	-0.662094	0.0450419	6.49242e-49	-0.00322904	0.0021504	0.1332	0.0443086	0.0668553	20
BRCA	ENSG00000087494	12	PTHLH	28111017	rs7316831	12	28455998	A	C	0.382704	0.00163019	0.000772012	0.0347197	-0.233	0.0381839	1.04717e-09	-0.00699652	0.00350614	0.0459875	0.0459875	0.0641163	20
BRCA	ENSG00000014216	11	CAPN1	64948037	rs11227144	11	64942416	T	G	0.439364	0.000808346	0.000775604	0.297312	0.138181	0.0221917	4.76362e-10	0.00584991	0.00569104	0.30399	0.0466189	0.75294	20
