# Supplementary material for: Mendelian Randomization Analysis of the Relationship between Neurotransmitter-Related Genes and Cancer: Insights from Multi-omics Data
Source: Research Square preprint supplement (doi:10.21203/rs.3.rs-6036757/v1), 2025-04-24
Supplement: Supplementary file 2 [file 225dc2ed9e4c17e63052684c.xlsx]

## Sheet: Chr1_batch1_smr_mr
EXP	OUT	presso_IVW	presso_MR_Egger	presso_Q_pval_Egger	presso_Q_pval_IVW	presso_Simple_mode	presso_Weighted_median	presso_Weighted_mode	ProbeChr	Gene	Probe_bp	topSNP	topSNP_chr	topSNP_bp	A1	A2	Freq	b_GWAS	se_GWAS	p_GWAS	b_eQTL	se_eQTL	p_eQTL	b_SMR	se_SMR	p_SMR	p_SMR_multi	p_HEIDI	nsnp_HEIDI
ENSG00000117450	BRCA	1.72575e-06	0.247296	0.680589	0.678868	0.0657485	0.000922563	0.0198877	1	PRDX1	45976708	rs17522918	1	45987574	A	C	0.082505	-0.00279951	0.00127425	0.0280214	-0.33	0.0295056	4.86706e-29	0.00848338	0.00393516	0.0311002	0.0193295	0.266427	20
ENSG00000159339	BRCA	7.07817e-06	0.239324	0.772907	0.848775	0.0815809	0.00163477	0.057108	1	PADI4	17634690	rs12737739	1	17660890	A	C	0.368787	-0.00164473	0.000783737	0.0358545	0.305092	0.0411047	1.15096e-13	-0.00539093	0.00266956	0.0434448	0.0307775	0.734811	20
