# Supplementary material for: Mendelian Randomization Analysis of the Relationship between Neurotransmitter-Related Genes and Cancer: Insights from Multi-omics Data
Source: Research Square preprint supplement (doi:10.21203/rs.3.rs-6036757/v1), 2025-04-24
Supplement: Supplementary file 3 [file 4670e5dd95586a61451c313f.xlsx]

## Sheet: mqtl_msmr_adj
Outco_ID	probeID	ProbeChr	Gene	Probe_bp	topSNP	topSNP_chr	topSNP_bp	A1	A2	Freq	b_GWAS	se_GWAS	p_GWAS	b_eQTL	se_eQTL	p_eQTL	b_SMR	se_SMR	p_SMR	p_SMR_multi	p_HEIDI	nsnp_HEIDI
BRCA	cg14669361	6	NA	32038747	rs41268896	6	32070069	A	G	0.34493	-0.00225537	0.000826818	0.00638	0.287973	0.0363292	2.25e-15	-0.00783188	0.00303641	0.0099	0.0099	0.999	19
BRCA	cg02683114	2	NA	24398427	rs10445893	2	24407128	A	G	0.38171	-0.00294376	0.00078307	0.00017	-0.355381	0.0329982	4.78e-27	0.00828339	0.00233385	0.000386	0.000492	0.996	20
BRCA	cg08309183	7	NA	150674375	rs35633617	7	150675562	G	A	0.313121	-0.00224691	0.000794609	0.00469	0.410591	0.0325654	1.9e-36	-0.00547238	0.00198336	0.0058	0.00907	0.992	20
BRCA	cg25425994	13	NA	114928103	rs453784	13	114928104	A	G	0.0497018	-0.00528138	0.00165547	0.00142	-2.74253	0.0472318	0	0.00192573	0.000604539	0.00145	0.0046	0.992	20
BRCA	cg10407598	17	NA	73629365	rs820157	17	73661411	G	A	0.346918	-0.00257958	0.000801934	0.0013	0.223284	0.034232	6.91e-11	-0.0115529	0.00400454	0.00391	0.00391	0.99	12
BRCA	cg15355388	11	NA	57004919	rs599947	11	57013248	G	A	0.425447	-0.00239046	0.000762994	0.00173	0.217948	0.0330573	4.31e-11	-0.010968	0.00387597	0.00466	0.00466	0.987	12
BRCA	cg04035386	16	NA	68564532	rs1645935	16	68563791	A	C	0.208748	-0.00274966	0.000892357	0.00206	0.431605	0.0405999	2.14e-26	-0.00637078	0.00215263	0.00308	0.00213	0.987	20
BRCA	cg14669863	1	NA	155247706	rs12749306	1	155247707	T	G	0.281312	0.00347195	0.000857099	5.1e-05	0.948333	0.0311005	3.27e-204	0.00366111	0.000911736	5.93e-05	0.000561	0.985	20
BRCA	cg01034251	16	NA	88748522	rs3829494	16	88730007	G	A	0.410537	-0.00153523	0.000767679	0.0455	-0.261873	0.0326567	1.07e-15	0.0058625	0.00302128	0.0523	0.00842	0.984	20
BRCA	cg07163735	17	NA	43971906	rs113138968	17	44314261	T	C	0.239563	-0.00351284	0.000905264	0.000104	0.243725	0.0398144	9.27e-10	-0.0144131	0.00439768	0.00105	0.00105	0.984	11
BRCA	cg10862960	2	NA	101398178	rs11897738	2	101383053	T	C	0.124254	0.0020672	0.00112309	0.0657	-0.451443	0.0470847	8.99e-22	-0.00457909	0.00253321	0.0707	0.00457	0.983	20
BRCA	cg25085245	7	NA	100032816	rs6974282	7	100098295	T	C	0.196819	0.00333592	0.000962719	0.00053	0.274866	0.0392344	2.46e-12	0.0121365	0.00390751	0.0019	0.0019	0.981	8
BRCA	cg17794524	15	NA	101787472	rs11636578	15	101787969	C	T	0.352883	-0.000521925	0.00081014	0.519	-0.302994	0.0347741	2.95e-18	0.00172256	0.00268108	0.521	0.00873	0.979	15
BRCA	cg10558616	6	NA	136872084	rs3757161	6	136872511	C	G	0.135189	-0.00352618	0.00107878	0.00108	0.644184	0.0478319	2.42e-41	-0.00547387	0.00172326	0.00149	0.0057	0.979	15
BRCA	cg16649577	8	NA	11646810	rs2645450	8	11646512	C	T	0.2167	-0.00269273	0.000900706	0.00279	0.336652	0.0374206	2.33e-19	-0.00799856	0.00281934	0.00455	0.00939	0.973	20
BRCA	cg26870936	17	NA	73631785	rs820158	17	73660179	G	A	0.360835	-0.00259925	0.000796639	0.0011	0.337065	0.0342765	8.06e-23	-0.00771142	0.00249016	0.00196	0.00196	0.97	17
BRCA	cg10364374	4	NA	125857940	rs1532493	4	125857939	C	T	0.130219	0.000865182	0.00115	0.452	0.949898	0.0449686	4.83e-99	0.000910816	0.00121142	0.452	0.0084	0.969	20
BRCA	cg20518994	2	NA	25141532	rs6746013	2	25143649	G	C	0.466203	-0.00244109	0.000756498	0.00125	0.53192	0.0314573	3.85e-64	-0.00458921	0.00144787	0.00153	0.000186	0.968	20
BRCA	cg21989425	17	NA	28667441	rs6505179	17	28668860	T	C	0.327038	0.0011698	0.000809534	0.148	1.02043	0.0298199	1.23e-256	0.00114638	0.000794033	0.149	0.00551	0.965	20
BRCA	cg01224103	19	NA	18221194	rs4808751	19	18252292	T	C	0.252485	0.00318557	0.000865456	0.000233	0.267397	0.0370002	4.94e-13	0.0119133	0.00363221	0.00104	0.00104	0.964	20
BRCA	cg08698997	16	NA	88989212	rs488327	16	88989005	C	T	0.308151	0.0025046	0.00080504	0.00186	0.529815	0.0334164	1.3e-56	0.00472731	0.00154845	0.00227	0.00469	0.964	20
BRCA	cg26752888	8	NA	11627280	rs8191514	8	11627113	G	C	0.23161	0.00261666	0.000883929	0.00307	0.458133	0.0344505	2.37e-40	0.00571157	0.00197664	0.00386	0.00303	0.958	20
BRCA	cg01914555	16	NA	6624095	rs9940967	16	6623956	C	A	0.479125	0.00250483	0.000759036	0.000967	0.218424	0.0320927	1e-11	0.0114677	0.003862	0.00298	0.00298	0.957	16
BRCA	cg09511477	7	NA	99964511	rs28495773	7	99943583	T	A	0.17495	0.00347704	0.000986651	0.000425	-0.27402	0.0408229	1.91e-11	-0.012689	0.00406672	0.00181	0.00181	0.955	4
BRCA	cg16493416	7	NA	100660494	rs12539994	7	100659983	T	G	0.207753	0.00278736	0.000962621	0.00378	0.27586	0.0394786	2.8e-12	0.0101043	0.00377728	0.00747	0.00747	0.953	15
BRCA	cg20225745	12	NA	52585849	rs2085502	12	52581787	A	G	0.434394	-0.00235557	0.000764541	0.00206	0.18797	0.0330527	1.29e-08	-0.0125316	0.00462592	0.00675	0.00675	0.951	3
BRCA	cg26706238	2	NA	44066206	rs3806470	2	44067169	A	G	0.297217	-0.00227597	0.00081615	0.00529	0.309466	0.0356895	4.28e-18	-0.00735451	0.00277032	0.00794	0.00794	0.951	12
BRCA	cg01343041	2	NA	24397787	rs10192600	2	24396680	G	A	0.300199	-0.00305336	0.000819571	0.000195	0.308897	0.0341904	1.65e-19	-0.00988472	0.00286995	0.000573	0.00268	0.941	20
BRCA	cg27490993	6	NA	28984269	rs148696809	6	28934352	C	T	0.0695825	-0.00117276	0.00117356	0.318	0.486312	0.0500462	2.55e-22	-0.00241154	0.00242591	0.32	0.00366	0.941	20
BRCA	cg19664013	6	NA	28757366	rs2130357	6	27886830	T	C	0.262425	0.00314048	0.000897725	0.000468	-0.185199	0.0384989	1.51e-06	-0.0169573	0.00599357	0.00467	0.00467	0.939	4
BRCA	cg02811197	7	NA	138481741	rs6467806	7	138476914	A	G	0.0626243	0.00535232	0.00149389	0.00034	0.423115	0.061448	5.75e-12	0.0126498	0.00398004	0.00148	0.00118	0.938	6
BRCA	cg08269733	16	NA	62057179	rs9928128	16	62068870	T	C	0.449304	0.00212733	0.00076215	0.00525	0.333536	0.0322284	4.22e-25	0.00637811	0.00236671	0.00704	0.00704	0.938	20
BRCA	cg17744293	1	NA	50890952	rs10788928	1	50968097	A	T	0.456262	0.00235945	0.000757921	0.00185	0.180712	0.0329775	4.26e-08	0.0130564	0.00482361	0.00679	0.00679	0.937	9
BRCA	cg01542486	8	NA	142440457	rs12549500	8	142432852	A	G	0.181909	-0.00318695	0.00102302	0.00184	-0.400635	0.0428055	8.02e-21	0.00795475	0.00269123	0.00312	0.00312	0.936	5
BRCA	cg22711792	1	NA	50883329	rs2055491	1	50852769	C	T	0.483101	-0.00246341	0.000757422	0.00114	0.206309	0.0323919	1.9e-10	-0.0119404	0.00412226	0.00377	0.00377	0.935	19
BRCA	cg04994447	7	NA	150718483	rs12539718	7	150718522	G	C	0.253479	-0.00274425	0.000855634	0.00134	0.323579	0.0376631	8.59e-18	-0.00848093	0.00282253	0.00266	0.00403	0.934	11
BRCA	cg27061485	16	NA	88989387	rs4782500	16	89008542	T	C	0.343936	0.00234518	0.000788498	0.00294	0.329608	0.0328472	1.07e-23	0.00711506	0.0024951	0.00435	0.00526	0.933	20
BRCA	cg11534596	1	NA	17574720	rs2977229	1	17576706	C	T	0.295229	0.00131984	0.0008312	0.112	-0.715772	0.0328308	2.23e-105	-0.00184394	0.00116434	0.113	0.00893	0.932	20
BRCA	cg11886965	6	NA	28879849	rs3129102	6	29205336	T	C	0.166998	0.00376219	0.00106147	0.000394	-0.373605	0.0441913	2.81e-17	-0.01007	0.00308073	0.00108	0.00189	0.932	20
BRCA	cg07731191	12	NA	54329010	rs1867299	12	54329975	T	C	0.296223	-0.00298838	0.000838836	0.000367	0.290605	0.0351052	1.25e-16	-0.0102833	0.00314247	0.00107	0.00212	0.93	11
BRCA	cg10840135	22	NA	42526619	rs2071711	22	42477650	C	G	0.333002	0.00188602	0.000807137	0.0195	0.248298	0.0340946	3.27e-13	0.00759579	0.00341391	0.0261	0.00893	0.93	20
BRCA	cg19526267	5	NA	108208768	rs181331526	5	108208750	G	A	0.0397614	-0.00531908	0.00176046	0.00252	0.468353	0.0815212	9.18e-09	-0.011357	0.00424694	0.00749	0.00749	0.93	4
BRCA	cg12717612	20	NA	56321500	rs6099739	20	56325354	T	C	0.187873	0.00274168	0.000993809	0.0058	-0.531865	0.0421977	2e-36	-0.00515484	0.00191277	0.00704	0.00704	0.93	20
BRCA	cg07569264	16	NA	89020038	rs11864991	16	89001430	G	A	0.353877	0.00246218	0.000783868	0.00168	0.179901	0.0326581	3.62e-08	0.0136863	0.0050158	0.00636	0.00636	0.929	13
BRCA	cg09605634	13	NA	36521538	rs1936004	13	36521433	T	G	0.328032	0.00342378	0.000801288	1.93e-05	0.190686	0.0338858	1.83e-08	0.0179551	0.00527622	0.000666	0.00222	0.928	7
BRCA	cg03595580	7	NA	97880848	rs12536125	7	97885725	G	A	0.275348	-0.00280375	0.000870368	0.00128	-0.349973	0.0365063	9.1e-22	0.00801133	0.00262361	0.00226	0.00226	0.927	20
BRCA	cg22692507	5	NA	81446503	rs11747552	5	81378792	T	C	0.0924453	0.000933072	0.00126363	0.46	-0.303465	0.055042	3.52e-08	-0.00307473	0.00420119	0.464	0.00861	0.926	4
BRCA	cg12219789	17	NA	7227499	rs8081264	17	7235316	C	G	0.210736	-0.00327259	0.000878995	0.000197	0.305994	0.0360326	2.03e-17	-0.0106949	0.00313653	0.00065	0.00065	0.926	9
BRCA	cg21566348	3	NA	182510892	rs78770309	3	182497261	C	G	0.0904573	-0.00407375	0.00124471	0.00106	1.31535	0.0476596	1.15e-167	-0.00309708	0.000952926	0.00115	0.00133	0.925	20
BRCA	cg18954047	6	NA	28889682	rs3129102	6	29205336	T	C	0.166998	0.00376219	0.00106147	0.000394	-0.326164	0.0443671	1.96e-13	-0.0115347	0.00361289	0.00141	0.000202	0.925	20
BRCA	cg19262631	19	NA	19231829	rs72993489	19	19242272	C	T	0.117296	0.00367001	0.00112615	0.00112	-0.262102	0.0486185	7.01e-08	-0.0140022	0.00502066	0.00529	0.00529	0.925	3
BRCA	cg01476739	2	NA	241853884	rs4417704	2	241846573	A	G	0.232604	0.00180913	0.000864042	0.0363	0.722228	0.0370659	1.47e-84	0.00250493	0.00120324	0.0374	0.00366	0.924	20
BRCA	cg11320084	1	NA	185014181	rs55668279	1	184981296	A	G	0.0576541	-0.00463343	0.00164167	0.00477	0.438474	0.0657166	2.52e-11	-0.0105672	0.00406525	0.00934	0.00934	0.923	9
BRCA	cg21228424	6	NA	42678314	rs2268682	6	42678349	A	G	0.234592	-0.0027029	0.000864457	0.00177	0.235908	0.0377668	4.2e-10	-0.0114574	0.00409782	0.00517	0.00517	0.923	10
BRCA	cg17540765	17	NA	73631586	rs820158	17	73660179	G	A	0.360835	-0.00259925	0.000796639	0.0011	0.306311	0.0345273	7.21e-19	-0.00848566	0.00277107	0.0022	0.0022	0.923	18
BRCA	cg08297686	14	NA	68943486	rs11628653	14	68818976	G	T	0.413519	0.00233118	0.000771976	0.00253	-0.236185	0.0331759	1.09e-12	-0.00987014	0.00355041	0.00544	0.00544	0.92	19
BRCA	cg11023668	2	NA	25095040	rs13410999	2	25097939	C	T	0.426441	-0.00242609	0.000760633	0.00142	-1.12276	0.0214945	0	0.00216083	0.000678729	0.00145	0.000135	0.92	20
BRCA	cg04605607	6	NA	74229257	rs3822960	6	74230859	C	T	0.306163	0.00147348	0.000817679	0.0715	0.743853	0.0330031	1.73e-112	0.00198088	0.00110276	0.0724	0.00761	0.919	20
BRCA	cg19912559	1	NA	40204330	rs7547787	1	40220806	A	G	0.356859	0.00299549	0.000780962	0.000125	0.84267	0.0292442	1.39e-182	0.00355476	0.000934946	0.000143	0.000876	0.917	20
BRCA	cg12340651	20	NA	62131960	rs114224463	20	61998343	A	G	0.027833	0.00551377	0.00209661	0.00854	-0.768792	0.0854413	2.3e-19	-0.00717199	0.00284124	0.0116	0.000209	0.916	18
BRCA	cg04537282	11	NA	331179	rs7937786	11	332857	A	C	0.415507	-0.00276017	0.000775328	0.000371	0.276187	0.032998	5.77e-17	-0.00999384	0.00305064	0.00105	0.00105	0.916	6
BRCA	cg04015962	1	NA	10949192	rs12750845	1	10962372	T	A	0.39662	-0.00105385	0.000790262	0.182	0.266074	0.0340052	5.1e-15	-0.00396074	0.00301291	0.189	0.00275	0.914	5
BRCA	cg11619216	17	NA	73642080	rs820129	17	73668107	G	A	0.365805	-0.00255792	0.000795659	0.00131	0.195376	0.0336768	6.57e-09	-0.0130923	0.00465592	0.00492	0.00492	0.913	9
BRCA	cg19470385	22	NA	46446562	rs9627368	22	46445002	G	C	0.287276	0.00221211	0.000819219	0.00693	-0.575293	0.0326226	1.33e-69	-0.00384519	0.0014406	0.0076	0.00342	0.91	20
BRCA	cg25400378	10	NA	133558485	rs9322837	10	133539229	G	A	0.322068	-0.0022082	0.000828165	0.00767	-0.408786	0.0340055	2.75e-33	0.00540185	0.00207515	0.00924	0.0083	0.908	20
BRCA	cg14405753	12	NA	77273198	rs1587110	12	77273210	T	C	0.353877	-0.0024921	0.000792315	0.00166	0.228293	0.0336503	1.17e-11	-0.0109162	0.00382546	0.00432	0.00432	0.908	3
BRCA	cg01966878	4	NA	90757139	rs2301134	4	90758945	A	G	0.514911	0.000139376	0.000757776	0.854	0.767004	0.0294403	1.25e-149	0.000181715	0.000987993	0.854	0.00187	0.908	20
BRCA	cg21116660	6	NA	28839951	rs116361574	6	28759854	C	A	0.0805169	0.000504036	0.00136664	0.712	-0.890583	0.0612974	7.95e-48	-0.000565962	0.00153504	0.712	0.00253	0.907	20
BRCA	cg09822192	14	NA	24801191	rs12436417	14	24799578	G	C	0.291252	0.00107793	0.000828999	0.194	-1.04947	0.0298576	1.2e-270	-0.00102712	0.000790462	0.194	0.00836	0.906	20
BRCA	cg12395012	8	NA	11607386	rs7006733	8	11607990	G	A	0.393638	0.00190732	0.000784236	0.015	0.311382	0.0324324	7.92e-22	0.00612534	0.00259812	0.0184	0.00311	0.906	20
BRCA	cg12896170	6	NA	28890069	rs3129102	6	29205336	T	C	0.166998	0.00376219	0.00106147	0.000394	-0.51586	0.0436225	2.88e-32	-0.00729304	0.0021481	0.000686	0.00377	0.905	20
BRCA	cg13173848	9	NA	16870893	rs55913845	9	16883602	T	C	0.0695825	0.00457479	0.00146926	0.00185	-0.542991	0.0626378	4.37e-18	-0.00842517	0.00287512	0.00339	0.00339	0.902	11
BRCA	cg08793894	17	NA	7227737	rs8081264	17	7235316	C	G	0.210736	-0.00327259	0.000878995	0.000197	0.429223	0.0360647	1.16e-32	-0.00762445	0.00214574	0.00038	0.0091	0.901	19
BRCA	cg19145320	11	NA	75130069	rs571632	11	75124132	C	T	0.427435	-0.00220343	0.000769636	0.0042	0.259711	0.0320944	5.86e-16	-0.00848416	0.00314343	0.00695	0.00695	0.9	7
BRCA	cg11979621	7	NA	155562188	rs3801904	7	155569167	T	C	0.145129	-0.00328792	0.00105007	0.00174	0.53782	0.0431498	1.17e-35	-0.00611342	0.00201312	0.00239	0.00382	0.899	19
BRCA	cg00335908	16	NA	89002930	rs499706	16	89004352	G	C	0.355865	0.00230972	0.000778007	0.00299	-0.18156	0.032688	2.79e-08	-0.0127215	0.00485882	0.00884	0.00884	0.898	9
BRCA	cg14714009	6	NA	149285724	rs6933251	6	149285138	T	C	0.356859	-0.00228545	0.000783604	0.00354	-0.216442	0.0336725	1.29e-10	0.0105592	0.00397564	0.00791	0.00791	0.893	17
BRCA	cg08077337	2	NA	202900063	rs11900798	2	202911065	T	C	0.289264	-0.00230945	0.00081455	0.00458	0.664594	0.0336226	5.81e-87	-0.00347498	0.00123818	0.00501	0.00262	0.892	20
BRCA	cg11085602	1	NA	149889339	rs11205303	1	149906413	C	T	0.368787	0.00281976	0.000770719	0.000254	0.431	0.03214	5.28e-41	0.00654237	0.00185357	0.000416	0.00827	0.891	8
BRCA	cg21821103	1	NA	3563485	rs12027041	1	3591448	C	G	0.410537	-0.00226014	0.000769424	0.00331	0.191094	0.0315957	1.47e-09	-0.0118274	0.00447618	0.00823	0.00823	0.891	4
BRCA	cg20893898	20	NA	31822877	rs6059183	20	31826027	C	T	0.228628	0.00330473	0.00085278	0.000107	0.201091	0.0341664	3.97e-09	0.016434	0.00507746	0.00121	0.00121	0.89	3
BRCA	cg00516092	20	NA	31177275	rs1810635	20	31131309	T	A	0.292247	0.002537	0.000810628	0.00175	0.256651	0.0344695	9.64e-14	0.00988502	0.00342616	0.00391	0.00391	0.888	20
BRCA	cg25786333	6	NA	29364799	rs4713216	6	29364147	G	A	0.452286	-0.00258116	0.000763304	0.000721	-0.292111	0.030746	2.08e-21	0.00883623	0.00277364	0.00144	0.00352	0.885	3
BRCA	cg17319007	14	NA	92414300	rs72705373	14	92410261	C	G	0.400596	0.00218057	0.000781869	0.00529	0.30261	0.0329496	4.15e-20	0.00720588	0.00270026	0.00762	0.00202	0.884	20
BRCA	cg09149980	6	NA	28864093	rs114995312	6	28895648	T	C	0.082505	4.51e-05	0.00137453	0.974	0.72774	0.059128	8.22e-35	6.19e-05	0.00188877	0.974	0.00719	0.883	20
BRCA	cg22715764	1	NA	10556294	rs648324	1	10556447	G	T	0.292247	-0.0034978	0.000817195	1.87e-05	-0.59199	0.0342258	4.99e-67	0.00590855	0.00142206	3.25e-05	0.0041	0.882	20
BRCA	cg08473090	17	NA	43861104	rs113138968	17	44314261	T	C	0.239563	-0.00351284	0.000905264	0.000104	0.210706	0.040171	1.56e-07	-0.0166718	0.00534426	0.00181	0.00181	0.88	6
BRCA	cg01860168	7	NA	100026446	rs4074838	7	100032665	A	G	0.192843	0.00316994	0.000955312	0.000906	0.540565	0.0380229	7.2e-46	0.00586412	0.00181475	0.00123	0.000673	0.88	20
BRCA	cg14261943	6	NA	28972348	rs142403264	6	29245760	C	T	0.511928	-0.00240976	0.00075554	0.00143	-0.19725	0.0320614	7.64e-10	0.0122168	0.0043145	0.00463	0.00167	0.878	18
BRCA	cg05290300	16	NA	80966763	rs12716902	16	80973601	A	G	0.370775	0.00219204	0.000782244	0.00507	-0.516984	0.0328826	1.07e-55	-0.00424005	0.00153694	0.0058	0.00822	0.878	20
BRCA	cg16686279	1	NA	4087226	rs3813810	1	4088339	A	C	0.159046	-0.00303404	0.00111684	0.0066	0.470222	0.0455371	5.37e-25	-0.00645236	0.00245595	0.00861	0.00861	0.876	12
BRCA	cg07160278	7	NA	100027354	rs11764818	7	100043055	A	G	0.193837	0.00319496	0.000955418	0.000826	0.452769	0.0385705	8.07e-32	0.00705649	0.00219412	0.0013	0.000741	0.875	20
BRCA	cg00521887	18	NA	39535162	rs3813065	18	39534825	T	C	0.133201	0.0034884	0.00114999	0.00242	-0.406226	0.0476578	1.54e-17	-0.00858734	0.00300483	0.00427	0.00427	0.875	13
BRCA	cg24063856	17	NA	43863303	rs62057073	17	43861117	T	C	0.239563	-0.00357793	0.000905252	7.74e-05	-0.315348	0.0387757	4.2e-16	0.011346	0.0031917	0.000378	0.000378	0.875	14
BRCA	cg00390724	3	NA	18484742	rs7618405	3	18250509	A	C	0.205765	0.00267142	0.000929267	0.00404	-0.353886	0.0389135	9.53e-20	-0.00754881	0.00275397	0.00612	0.00309	0.875	17
BRCA	cg05027444	10	NA	43050881	rs73262662	10	43059191	G	A	0.0934394	-0.00433398	0.00143627	0.00255	0.432439	0.0622463	3.73e-12	-0.0100222	0.0036211	0.00564	0.00564	0.872	15
BRCA	cg21929969	5	NA	60571434	rs7448844	5	60554339	T	C	0.205765	0.0028539	0.000943702	0.00249	0.277174	0.040491	7.63e-12	0.0102964	0.00372218	0.00567	0.00567	0.871	20
BRCA	cg20551517	17	NA	47046292	rs8079149	17	47042751	G	A	0.431412	-0.00236876	0.000761691	0.00187	-0.286818	0.0320448	3.54e-19	0.00825876	0.00281139	0.00331	0.00331	0.871	20
BRCA	cg04121983	17	NA	73511085	rs8064529	17	73519413	C	T	0.316103	-0.00266906	0.000832218	0.00134	-0.471722	0.0348574	1e-41	0.00565812	0.00181308	0.0018	0.00692	0.87	20
BRCA	cg14628274	9	NA	19424228	rs10964131	9	19424295	G	A	0.178926	-0.00359695	0.00107283	0.0008	0.312463	0.0447948	3.05e-12	-0.0115116	0.00380949	0.00251	0.00251	0.869	17
BRCA	cg25507767	7	NA	138483143	rs896184	7	138493368	C	T	0.361829	-0.00104804	0.000779008	0.179	-0.622453	0.0327557	1.61e-80	0.00168373	0.00125465	0.18	0.00192	0.864	20
BRCA	cg08125020	6	NA	28889357	rs3129102	6	29205336	T	C	0.166998	0.00376219	0.00106147	0.000394	-0.424352	0.0442038	8e-22	-0.00886573	0.00266643	0.000884	0.000193	0.864	20
BRCA	cg12051614	1	NA	40205236	rs12094291	1	40226046	A	G	0.356859	0.00297386	0.000781105	0.000141	0.536718	0.0326205	7.93e-61	0.00554082	0.00149379	0.000208	8.94e-05	0.862	20
BRCA	cg10502571	5	NA	6572919	rs522335	5	6572878	C	T	0.378728	0.00216083	0.000781267	0.00568	0.25431	0.0332935	2.2e-14	0.00849683	0.00326729	0.00931	0.00324	0.86	20
BRCA	cg25978208	15	NA	25093244	rs12441116	15	25100340	G	T	0.340954	-0.00222374	0.000798999	0.00538	-0.302818	0.0335586	1.82e-19	0.00734349	0.0027612	0.00782	0.00247	0.859	12
BRCA	cg14974772	14	NA	92414425	rs17806016	14	92423810	G	A	0.308151	0.00254079	0.000807746	0.00166	0.353449	0.0336122	7.33e-26	0.00718856	0.00238538	0.00258	0.00793	0.859	20
BRCA	cg09141835	16	NA	88988174	rs488327	16	88989005	C	T	0.308151	0.0025046	0.00080504	0.00186	-0.695403	0.0316925	1.03e-106	-0.00360165	0.00116924	0.00207	0.00989	0.857	20
BRCA	cg27037648	17	NA	73511087	rs8064529	17	73519413	C	T	0.316103	-0.00266906	0.000832218	0.00134	-0.366175	0.0351589	2.12e-25	0.00728903	0.00237805	0.00218	0.00406	0.856	20
BRCA	cg08044789	14	NA	65414550	rs7143541	14	65419777	T	G	0.128231	0.00390611	0.00126682	0.00205	-1.03564	0.050756	1.53e-92	-0.00377169	0.00123711	0.0023	0.00947	0.856	20
BRCA	cg12776287	18	NA	24125939	rs1111208	18	24125865	G	C	0.431412	0.00271829	0.00076438	0.000376	-0.498742	0.0316877	8.13e-56	-0.00545029	0.00157125	0.000523	0.0042	0.855	20
BRCA	cg00924727	12	NA	30848360	rs2278558	12	30783743	T	C	0.251491	0.00280644	0.000863541	0.00115	0.255959	0.0354648	5.3e-13	0.0109644	0.00370002	0.00304	0.00304	0.855	20
BRCA	cg17185202	20	NA	3762653	rs683808	20	3749886	A	G	0.475149	0.00294186	0.000764719	0.00012	0.297014	0.0318441	1.09e-20	0.00990479	0.00278509	0.000376	0.000475	0.852	20
BRCA	cg05579598	16	NA	88989069	rs488193	16	88989059	G	A	0.318091	0.00238733	0.000796409	0.00272	0.584852	0.0327542	2.61e-71	0.00408194	0.00138078	0.00311	0.00801	0.85	20
BRCA	cg24977891	2	NA	201733454	rs7562391	2	201736166	C	A	0.144135	-0.00343971	0.00114622	0.00269	0.311895	0.0474086	4.74e-11	-0.0110284	0.00403929	0.00633	0.00633	0.849	14
BRCA	cg06411619	8	NA	142439280	rs56177983	8	142439308	T	C	0.181909	-0.00311147	0.00101989	0.00228	-0.263868	0.0438136	1.72e-09	0.0117918	0.00433278	0.0065	0.0065	0.848	3
BRCA	cg26041493	11	NA	66306861	rs11227522	11	66305728	C	A	0.241551	-0.00263388	0.000879739	0.00275	0.812993	0.0357025	8.83e-115	-0.00323973	0.00109141	0.00299	0.00908	0.847	20
BRCA	cg11921111	13	NA	62884315	rs9539475	13	62876644	C	T	0.506958	0.00207015	0.000757905	0.00631	0.519071	0.0316773	2.4e-60	0.00398818	0.00148026	0.00705	0.0091	0.846	20
BRCA	cg15841205	14	NA	37056458	rs3809433	14	37052092	A	G	0.199801	0.00327204	0.00103975	0.00165	-0.358081	0.0451648	2.22e-15	-0.00913771	0.00312405	0.00345	0.000514	0.846	20
BRCA	cg10986946	11	NA	12001622	rs10734190	11	12001587	T	C	0.141153	-0.00366902	0.00107021	0.000607	-0.310819	0.0435905	1e-12	0.0118044	0.0038205	0.002	0.00863	0.843	16
BRCA	cg12834730	2	NA	234159346	rs12692250	2	234146047	G	T	0.39662	0.00269436	0.000778868	0.000542	0.252392	0.0329953	2.02e-14	0.0106753	0.00338684	0.00162	0.00759	0.842	20
BRCA	cg27021553	11	NA	69462783	rs11263441	11	69252000	A	G	0.084493	-0.000711078	0.00139619	0.611	0.376047	0.061204	8.04e-10	-0.00189093	0.00372554	0.612	0.00722	0.842	5
BRCA	cg09819222	15	NA	51559977	rs8042086	15	51561478	T	C	0.399602	0.00235397	0.00076362	0.00205	-0.327843	0.0320331	1.39e-24	-0.00718017	0.00243259	0.00316	0.00577	0.842	20
BRCA	cg07327347	16	NA	25228004	rs146206983	16	25210408	T	C	0.0367793	-0.00786661	0.00225986	0.0005	-2.90048	0.0811962	1.81e-279	0.00271218	0.000782824	0.000531	0.00116	0.841	20
BRCA	cg08760211	11	NA	71288203	rs11234248	11	71286539	G	C	0.370775	0.00182029	0.000764972	0.0173	0.233248	0.0328201	1.19e-12	0.0078041	0.00345861	0.024	0.00357	0.84	7
BRCA	cg01406280	11	NA	69454447	rs2930975	11	69451837	C	G	0.494036	0.00255841	0.000759027	0.00075	0.232162	0.0322946	6.53e-13	0.0110199	0.00361091	0.00227	0.00357	0.839	16
BRCA	cg08894761	2	NA	31806234	rs600015	2	31820300	G	C	0.301193	-0.00261862	0.000819625	0.0014	0.198567	0.0354416	2.11e-08	-0.0131876	0.00475167	0.00551	0.00551	0.839	20
BRCA	cg11814155	7	NA	99998594	rs11771419	7	99988403	G	A	0.192843	0.00326454	0.000955275	0.000632	0.388444	0.0388141	1.41e-23	0.00840415	0.00259866	0.00122	0.00122	0.839	16
BRCA	cg20272146	14	NA	91866685	rs1285823	14	91855826	T	C	0.0228628	-0.00785056	0.00237034	0.000926	0.882476	0.0916905	6.3e-22	-0.00889606	0.0028406	0.00174	0.00621	0.839	11
BRCA	cg00857907	2	NA	202896898	rs7592801	2	202912688	T	C	0.461233	0.00174262	0.000765841	0.0229	0.512504	0.0318203	2.31e-58	0.00340021	0.00150915	0.0243	0.00406	0.839	20
BRCA	cg17353733	9	NA	124313186	rs2777306	9	124315153	T	C	0.293241	0.00309358	0.000814679	0.000146	-0.442526	0.0341191	1.81e-38	-0.00699073	0.00191825	0.000268	0.000173	0.839	20
BRCA	cg13696706	9	NA	124396830	rs10120537	9	124224316	T	G	0.389662	0.00281736	0.000773879	0.000272	0.284135	0.032632	3.11e-18	0.00991557	0.00295211	0.000783	0.000124	0.837	20
BRCA	cg06784539	7	NA	138483046	rs896184	7	138493368	C	T	0.361829	-0.00104804	0.000779008	0.179	-0.719811	0.0318139	2.42e-113	0.00145599	0.00108415	0.179	0.00225	0.835	20
BRCA	cg11310496	10	NA	118380175	rs12415178	10	118380345	T	C	0.351889	0.00192066	0.000778953	0.0137	0.214353	0.0325386	4.47e-11	0.00896027	0.00388018	0.0209	0.00647	0.834	5
BRCA	cg26318265	11	NA	1990435	rs217236	11	1981259	C	T	0.423459	-0.00261469	0.00077367	0.000726	0.252673	0.0339538	9.94e-14	-0.0103481	0.00336291	0.00209	0.000214	0.833	20
BRCA	cg01045132	19	NA	11649571	rs10418021	19	11640570	G	T	0.0646123	-0.00302074	0.00170919	0.0772	1.6617	0.0689227	1.98e-128	-0.00181786	0.00103134	0.078	0.0077	0.833	20
BRCA	cg06593603	5	NA	1218042	rs4075202	5	1243475	A	C	0.0516899	-0.00451752	0.00168141	0.00722	0.788114	0.0711734	1.69e-28	-0.00573206	0.00219536	0.00903	0.00943	0.833	9
BRCA	cg06154313	10	NA	95360494	rs11187545	10	95357105	G	A	0.0765408	0.00394358	0.00141774	0.00541	-0.731767	0.0616992	1.9e-32	-0.00538912	0.00198999	0.00677	0.00947	0.833	11
BRCA	cg04269569	16	NA	8963018	rs11074430	16	8698389	A	G	0.0775348	0.00468854	0.00149177	0.00167	0.297651	0.0614934	1.3e-06	0.0157518	0.00597565	0.00839	0.00839	0.832	3
BRCA	cg10960681	22	NA	43567465	rs62232065	22	43567279	A	C	0.220676	0.00206491	0.000909933	0.0233	0.561623	0.0382861	1.02e-48	0.00367668	0.00163946	0.0249	0.00526	0.83	20
BRCA	cg04586622	2	NA	25135609	rs10206196	2	25137323	C	T	0.432406	-0.00274146	0.000760653	0.000313	0.863846	0.0284076	4.18e-203	-0.00317355	0.000886705	0.000345	0.001	0.829	20
BRCA	cg25694480	20	NA	62032881	rs6122439	20	62032790	A	C	0.120278	0.00312193	0.00126149	0.0133	-0.97843	0.0501468	8.8e-85	-0.00319075	0.00129963	0.0141	0.0029	0.829	20
BRCA	cg05778494	1	NA	155165346	rs2974937	1	155168849	C	T	0.452286	-0.00227128	0.000758072	0.00273	-0.324611	0.0324496	1.47e-23	0.00699693	0.00243782	0.0041	0.0041	0.828	20
BRCA	cg11837016	18	NA	45558118	rs67927311	18	45557223	C	T	0.404573	0.00214364	0.000772558	0.00552	0.314173	0.0331642	2.71e-21	0.00682312	0.00256233	0.00775	0.00775	0.828	20
BRCA	cg15114474	11	NA	69451412	rs602652	11	69462642	A	G	0.513917	0.00288787	0.000759988	0.000145	-0.200073	0.0322765	5.69e-10	-0.0144341	0.00445547	0.0012	0.0012	0.827	7
BRCA	cg10848828	6	NA	30104295	rs114882073	6	29659591	T	C	0.0477137	-0.000463371	0.00162799	0.776	0.907674	0.0610508	5.36e-50	-0.000510504	0.00179391	0.776	0.00815	0.825	20
BRCA	cg15644626	8	NA	11616798	rs804290	8	11616836	A	G	0.249503	0.00299149	0.000866298	0.000554	0.423548	0.0345135	1.28e-34	0.00706293	0.00212477	0.000887	0.00696	0.822	20
BRCA	cg22720041	19	NA	44952725	rs926053	19	44952075	C	G	0.0854871	0.00420833	0.00120721	0.00049	0.317482	0.0531323	2.3e-09	0.0132553	0.00440224	0.0026	0.0026	0.822	8
BRCA	cg18825221	14	NA	68749962	rs3784099	14	68749927	A	G	0.343936	0.00327984	0.000839873	9.42e-05	-1.22865	0.0262198	0	-0.00266947	0.000685944	9.96e-05	9.71e-06	0.822	20
BRCA	cg14957089	11	NA	331092	rs7944394	11	323649	T	C	0.429423	0.00252341	0.000761372	0.000919	-0.206821	0.0324198	1.78e-10	-0.0122009	0.00414847	0.00327	0.00327	0.82	6
BRCA	cg27101125	19	NA	17392770	rs3745191	19	17439034	T	C	0.0854871	-0.00424669	0.00147476	0.00398	0.385887	0.0605619	1.87e-10	-0.011005	0.00419389	0.00869	0.00869	0.819	6
BRCA	cg01884057	2	NA	25150051	rs6752378	2	25150116	A	C	0.466203	-0.0023975	0.00075722	0.00154	1.00174	0.025667	0	-0.00239334	0.000758388	0.0016	0.000172	0.819	20
BRCA	cg12305798	2	NA	24396550	rs10192600	2	24396680	G	A	0.300199	-0.00305336	0.000819571	0.000195	-0.280586	0.0340472	1.71e-16	0.0108821	0.00320553	0.000687	0.00155	0.819	20
BRCA	cg23598419	2	NA	25391042	rs2384092	2	25402891	C	T	0.199801	0.00292989	0.000985952	0.00296	-0.322043	0.0415998	9.83e-15	-0.00909782	0.00327936	0.00553	0.00587	0.819	17
BRCA	cg07676361	16	NA	80966860	rs12716902	16	80973601	A	G	0.370775	0.00219204	0.000782244	0.00507	-0.633881	0.0320891	7.45e-87	-0.00345813	0.00124641	0.00553	0.00991	0.819	20
BRCA	cg17414007	19	NA	13002493	rs2242517	19	13002563	G	T	0.39165	0.00224931	0.00076389	0.00323	-0.295876	0.0333638	7.44e-19	-0.00760221	0.00272039	0.0052	0.00956	0.818	17
BRCA	cg05520308	17	NA	77904256	rs7214378	17	77909085	T	C	0.305169	-0.00199612	0.000817358	0.0146	0.243538	0.0350351	3.62e-12	-0.00819634	0.00355729	0.0212	0.00699	0.818	6
BRCA	cg13379558	19	NA	14797552	rs10404194	19	14719854	T	C	0.33996	-0.00307672	0.000799578	0.000119	0.217403	0.0326851	2.9e-11	-0.0141522	0.00424896	0.000866	0.000866	0.818	8
BRCA	cg20322977	10	NA	94821085	rs1097215	10	94787804	A	G	0.515905	-0.00187307	0.000758782	0.0136	-0.483266	0.0323363	1.68e-50	0.00387586	0.00159139	0.0149	0.0035	0.817	20
BRCA	cg16061301	6	NA	28886047	rs3129102	6	29205336	T	C	0.166998	0.00376219	0.00106147	0.000394	-0.678919	0.0430496	4.96e-56	-0.00554144	0.00160247	0.000544	0.00378	0.815	20
BRCA	cg21206770	1	NA	40203334	rs11809515	1	40205326	A	C	0.356859	0.00305467	0.0007826	9.49e-05	0.45307	0.0316424	1.68e-46	0.00674216	0.00179036	0.000166	0.000116	0.814	20
BRCA	cg03401519	2	NA	177042493	rs966801	2	177037827	A	G	0.371769	-0.00198445	0.000784317	0.0114	-0.61064	0.0325923	2.53e-78	0.00324979	0.00129608	0.0122	0.00954	0.814	20
BRCA	cg01383911	6	NA	30297627	rs114600011	6	29926549	T	C	0.0387674	0.00619534	0.00186232	0.000879	-0.460949	0.0771619	2.32e-09	-0.0134404	0.00462441	0.00366	0.00133	0.812	10
BRCA	cg19589317	15	NA	101729174	rs8024948	15	101731168	C	T	0.303181	-0.00114447	0.000815939	0.161	-0.208705	0.033987	8.21e-10	0.00548367	0.00401022	0.171	0.0058	0.812	10
BRCA	cg27189341	16	NA	80966703	rs12716902	16	80973601	A	G	0.370775	0.00219204	0.000782244	0.00507	-0.536338	0.0328298	5.39e-60	-0.00408705	0.00147979	0.00575	0.00348	0.811	20
BRCA	cg04458969	2	NA	183733105	rs6433992	2	183723722	A	G	0.338966	-0.00157471	0.000807298	0.0511	-0.411807	0.0347708	2.33e-32	0.0038239	0.00198679	0.0543	0.0098	0.81	20
BRCA	cg08756594	11	NA	1892392	rs57209236	11	1892343	G	A	0.0427435	-0.00207082	0.00182854	0.257	-0.722858	0.0794894	9.57e-20	0.00286477	0.00254914	0.261	0.00509	0.809	6
BRCA	cg20856330	6	NA	30313546	rs115411850	6	30395966	C	T	0.082505	-0.00242181	0.00171044	0.157	0.572957	0.0753957	2.98e-14	-0.00422686	0.00303666	0.164	0.00701	0.809	6
BRCA	cg02004747	7	NA	44581594	rs73321675	7	44588206	C	T	0.0427435	-0.00733262	0.00246493	0.00293	0.841209	0.0991977	2.25e-17	-0.00871676	0.00310529	0.005	0.005	0.807	10
BRCA	cg01031101	6	NA	28227091	rs12000	6	28227436	G	A	0.2167	0.00297189	0.00095744	0.00191	-0.235052	0.0408534	8.74e-09	-0.0126435	0.00462828	0.0063	0.0063	0.806	9
BRCA	cg14561282	4	NA	175839468	rs28483302	4	175830862	A	G	0.10835	-0.00746022	0.00116907	1.76e-10	0.413343	0.0470325	1.52e-18	-0.0180485	0.00349528	2.42e-07	2.42e-07	0.805	9
BRCA	cg10302498	12	NA	1738292	rs60938105	12	1898346	T	C	0.191849	-0.000355665	0.0010049	0.723	-0.408696	0.0419984	2.22e-22	0.000870243	0.00246042	0.724	0.00889	0.802	18
BRCA	cg26813908	17	NA	28443598	rs4310926	17	28433275	G	A	0.457256	-0.000242063	0.000755815	0.749	-0.312895	0.0328671	1.73e-21	0.000773624	0.00241692	0.749	0.000982	0.796	20
BRCA	cg05074385	6	NA	30137208	rs149543464	6	30400763	A	G	0.082505	-0.00083559	0.00108	0.439	-1.42936	0.0353037	0	0.00058459	0.000755721	0.439	0.00338	0.796	20
BRCA	cg03593336	1	NA	99471295	rs3913779	1	99573292	A	G	0.498012	-0.00109913	0.000759987	0.148	-0.790394	0.0293479	9.3e-160	0.00139061	0.000962915	0.149	0.00635	0.796	20
BRCA	cg00328935	8	NA	142517474	rs77336296	8	142522493	C	T	0.0198807	0.00881206	0.00278162	0.00154	-1.43629	0.118897	1.34e-33	-0.00613529	0.00200216	0.00218	0.00763	0.793	5
BRCA	cg24308847	20	NA	34653477	rs17093449	20	34817545	C	T	0.0328032	0.00493087	0.00205537	0.0164	-0.56273	0.0803008	2.42e-12	-0.00876241	0.0038606	0.0232	0.00373	0.792	12
BRCA	cg16677399	6	NA	28830902	rs148696809	6	28934352	C	T	0.0695825	-0.00117276	0.00117356	0.318	-1.5968	0.0386922	0	0.000734444	0.00073516	0.318	0.00035	0.79	20
BRCA	cg10511902	14	NA	91842949	rs6575189	14	91840267	T	C	0.32505	0.00403339	0.000819189	8.49e-07	0.448478	0.0345397	1.5e-38	0.00899351	0.00195351	4.15e-06	0.000106	0.787	20
BRCA	cg22421699	1	NA	28261367	rs9700058	1	28216623	A	G	0.38171	-0.00133724	0.000784934	0.0884	-0.198563	0.0339679	5.05e-09	0.00673459	0.00411753	0.102	0.00556	0.785	15
BRCA	cg00814883	7	NA	100076585	rs67163493	7	100023838	T	C	0.192843	0.00323799	0.000955135	0.000699	-1.30187	0.0302724	0	-0.00248718	0.00073594	0.000726	0.00357	0.784	20
BRCA	cg13919358	6	NA	125573188	rs3799734	6	125573194	G	A	0.460239	0.00139725	0.000763166	0.0671	-0.649058	0.0310413	4.39e-97	-0.00215274	0.0011803	0.0682	0.00339	0.783	20
BRCA	cg20395773	3	NA	141120919	rs13098180	3	141091595	A	T	0.382704	0.00358915	0.000785829	4.94e-06	-0.317592	0.0343786	2.51e-20	-0.0113011	0.00276023	4.23e-05	4.23e-05	0.783	20
BRCA	cg27525037	1	NA	182361500	rs4652704	1	182358196	C	G	0.209742	-0.00295297	0.000890966	0.000919	-0.419013	0.0356851	7.77e-32	0.00704744	0.00220943	0.00142	0.00558	0.783	20
BRCA	cg02639080	6	NA	28874754	rs3129102	6	29205336	T	C	0.166998	0.00376219	0.00106147	0.000394	-0.434863	0.0440575	5.6e-23	-0.00865144	0.00259353	0.000851	0.00777	0.783	20
BRCA	cg23184226	7	NA	97880563	rs12536125	7	97885725	G	A	0.275348	-0.00280375	0.000870368	0.00128	-0.354044	0.0362237	1.46e-22	0.00791921	0.00258844	0.00222	0.00222	0.78	20
BRCA	cg16021678	13	NA	55475951	rs9536906	13	55495222	T	C	0.2167	0.00284009	0.000966175	0.00329	-0.258005	0.0417856	6.64e-10	-0.0110079	0.00414751	0.00795	0.00795	0.777	5
BRCA	cg10938221	13	NA	42197109	rs113150194	13	42197348	A	G	0.0218688	0.00363181	0.00252225	0.15	-0.654345	0.106587	8.3e-10	-0.0055503	0.00395923	0.161	0.00845	0.777	6
BRCA	cg12061917	6	NA	29601556	rs6925143	6	29689254	C	G	0.0417495	0.00418119	0.00197668	0.0344	0.865066	0.0894184	3.87e-22	0.00483338	0.00233899	0.0388	0.00954	0.776	20
BRCA	cg24478145	14	NA	31090880	rs2273522	14	31097345	A	G	0.251491	-0.00257406	0.000906326	0.00451	0.240774	0.0385383	4.17e-10	-0.0106908	0.0041349	0.00972	0.00972	0.775	13
BRCA	cg23021340	6	NA	110678179	rs6939019	6	110711025	A	G	0.5	-0.00225722	0.000757467	0.00288	-0.717447	0.0289145	6.54e-136	0.00314618	0.00106337	0.00309	0.00685	0.775	20
BRCA	cg18417423	6	NA	80657436	rs239540	6	80673329	T	A	0.0735586	0.00372256	0.00150698	0.0135	0.919988	0.0633195	7.9e-48	0.00404631	0.00166155	0.0149	0.00575	0.774	20
BRCA	cg13041597	2	NA	2685798	rs6752761	2	2686209	A	G	0.183897	0.00263743	0.000990695	0.00776	0.436803	0.0411011	2.22e-26	0.00603803	0.00233814	0.00981	0.00254	0.773	10
BRCA	cg11211040	1	NA	40766357	rs17462950	1	40765549	T	C	0.0755467	-0.0022474	0.00122283	0.0661	0.944581	0.0498364	4.12e-80	-0.00237926	0.00130065	0.0674	0.00394	0.773	20
BRCA	cg15531562	11	NA	65601754	rs7107912	11	65603252	G	A	0.491054	0.00240636	0.000755467	0.00145	1.05378	0.0239338	0	0.00228355	0.000718785	0.00149	0.00168	0.773	20
BRCA	cg15508401	2	NA	239997380	rs140898460	2	240008082	T	C	0.028827	0.00679869	0.00216052	0.00165	-0.9848	0.0989118	2.37e-23	-0.00690363	0.00230083	0.0027	0.00827	0.771	3
BRCA	cg20583430	4	NA	4858814	rs28535448	4	4858220	C	A	0.054672	0.00604322	0.00197632	0.00223	0.509382	0.0791584	1.23e-10	0.0118638	0.0042956	0.00575	0.00765	0.768	13
BRCA	cg08885142	11	NA	69264296	rs12364616	11	69278603	T	G	0.121272	-0.00323486	0.00116846	0.00563	0.303602	0.0518458	4.75e-09	-0.0106549	0.0042571	0.0123	0.0016	0.768	4
BRCA	cg14240060	10	NA	130830949	rs12356830	10	130830938	C	T	0.301193	0.00232932	0.000807449	0.00392	0.216799	0.0336797	1.22e-10	0.0107441	0.00408132	0.00848	0.00848	0.768	3
BRCA	cg16255729	14	NA	93106394	rs2181379	14	93078740	T	C	0.0954274	0.0045549	0.00125998	0.0003	0.372445	0.0487759	2.24e-14	0.0122297	0.00374297	0.00109	3.47e-05	0.764	19
BRCA	cg01378999	20	NA	62059511	rs3827017	20	62056123	T	C	0.279324	-0.00221974	0.000808735	0.00606	-0.47628	0.0313894	5.31e-52	0.00466058	0.00172558	0.00692	0.00239	0.764	20
BRCA	cg07162905	6	NA	28887928	rs3129102	6	29205336	T	C	0.166998	0.00376219	0.00106147	0.000394	-0.437994	0.0444276	6.29e-23	-0.00858959	0.00257534	0.000852	0.00824	0.764	20
BRCA	cg08318660	17	NA	44122580	rs112010353	17	43666492	T	C	0.239563	-0.00363115	0.000907166	6.26e-05	0.216544	0.0411369	1.41e-07	-0.0167686	0.00526287	0.00144	0.00144	0.763	9
BRCA	cg08340737	12	NA	54324544	rs10783613	12	54321966	G	T	0.337972	-0.0029383	0.00081195	0.000296	0.39962	0.0344722	4.5e-31	-0.00735274	0.0021285	0.000551	0.00117	0.759	14
BRCA	cg16259886	2	NA	32265121	rs10779914	2	32106040	A	C	0.258449	-0.00243977	0.000857698	0.00445	-0.246142	0.0360186	8.27e-12	0.00991204	0.00377439	0.00864	0.00864	0.759	20
BRCA	cg09288885	16	NA	86066714	rs35781150	16	86082389	G	A	0.248509	-0.00216058	0.000914529	0.0182	-0.643409	0.0384519	7.55e-63	0.00335802	0.00143548	0.0193	0.00979	0.759	20
BRCA	cg26509328	18	NA	44787728	rs9956387	18	44773382	A	T	0.474155	0.00134999	0.000758913	0.0753	0.391484	0.0323139	8.79e-34	0.00344839	0.00195934	0.0784	0.00331	0.758	20
BRCA	cg03716908	5	NA	81149002	rs1501790	5	81148698	C	T	0.0675944	0.00443656	0.00158802	0.00521	-1.85637	0.0573545	8.1e-230	-0.00238991	0.000858625	0.00538	0.000238	0.758	20
BRCA	cg07720160	6	NA	30232814	rs114214384	6	29895959	A	G	0.0447316	0.00605585	0.00184466	0.00103	-0.401986	0.0795182	4.3e-07	-0.0150648	0.00547158	0.0059	0.0059	0.756	4
BRCA	cg10401017	6	NA	28887586	rs3129102	6	29205336	T	C	0.166998	0.00376219	0.00106147	0.000394	-0.734601	0.0424346	3.86e-67	-0.00512141	0.00147494	0.000516	0.00627	0.756	20
BRCA	cg10900703	10	NA	21824407	rs1802669	10	21827796	A	G	0.357853	0.00434102	0.000797938	5.32e-08	-0.211346	0.0350304	1.61e-09	-0.0205399	0.00508378	5.34e-05	6.96e-05	0.754	20
BRCA	cg20026346	6	NA	136872552	rs3757161	6	136872511	C	G	0.135189	-0.00352618	0.00107878	0.00108	0.525453	0.0478688	4.93e-28	-0.00671074	0.00214214	0.00173	0.0087	0.754	15
BRCA	cg04606053	20	NA	33815214	rs666006	20	33889677	C	T	0.0347913	0.00399837	0.00130203	0.00213	-0.334233	0.0550457	1.26e-09	-0.0119628	0.00436545	0.00614	0.0087	0.754	20
BRCA	cg24725246	14	NA	89976587	rs390345	14	89976534	G	A	0.172962	0.00302945	0.0010663	0.0045	-0.451852	0.047633	2.4e-21	-0.00670452	0.00246341	0.0065	0.0065	0.753	14
BRCA	cg24517323	17	NA	7227564	rs8081264	17	7235316	C	G	0.210736	-0.00327259	0.000878995	0.000197	0.45491	0.035637	2.57e-37	-0.00719393	0.00201275	0.000351	0.00284	0.752	20
BRCA	cg09938164	1	NA	22458396	rs2473319	1	22393449	A	G	0.0636183	-0.00439998	0.00150649	0.00349	-0.40221	0.0608626	3.88e-11	0.0109395	0.00409503	0.00755	0.00755	0.752	7
BRCA	cg00903577	6	NA	28831109	rs148696809	6	28934352	C	T	0.0695825	-0.00117276	0.00117356	0.318	-1.37234	0.0432189	2.86e-221	0.00085457	0.000855576	0.318	0.00143	0.75	20
BRCA	cg09409585	6	NA	28882403	rs3129102	6	29205336	T	C	0.166998	0.00376219	0.00106147	0.000394	-0.408357	0.0442682	2.85e-20	-0.00921299	0.00278464	0.000938	0.0059	0.742	20
BRCA	cg02965178	16	NA	53538660	rs7189819	16	53536345	T	C	0.303181	0.00303635	0.000819637	0.000212	-0.836116	0.0317151	3.61e-153	-0.00363149	0.000989922	0.000244	0.000725	0.741	20
BRCA	cg21037610	7	NA	157801381	rs7788947	7	157946684	T	C	0.279324	0.00182657	0.000797806	0.0221	0.24594	0.0346441	1.26e-12	0.00742689	0.00340843	0.0293	0.00984	0.741	12
BRCA	cg24867279	6	NA	28853021	rs3129102	6	29205336	T	C	0.166998	0.00376219	0.00106147	0.000394	-0.464844	0.0441078	5.72e-26	-0.00809345	0.00240918	0.000781	0.00374	0.74	20
BRCA	cg11504517	1	NA	3569899	rs12757620	1	3540024	G	T	0.428429	-0.00171566	0.000764528	0.0248	0.41377	0.0330608	6.15e-36	-0.00414641	0.00187718	0.0272	0.00333	0.739	20
BRCA	cg03935096	16	NA	9048985	rs1657086	16	9030916	C	G	0.190855	-0.00269875	0.000978878	0.00583	-0.368188	0.041575	8.29e-19	0.00732982	0.00278449	0.00848	0.00848	0.736	20
BRCA	cg05789250	6	NA	31804306	rs140091914	6	31754008	A	G	0.153082	0.00201242	0.00118822	0.0903	0.81557	0.0496432	1.19e-60	0.0024675	0.00146464	0.092	0.00571	0.735	20
BRCA	cg24920358	1	NA	40204285	rs56064244	1	40213890	T	C	0.356859	0.0029978	0.000780803	0.000123	0.842063	0.029238	2.13e-182	0.00356007	0.000935453	0.000141	0.000309	0.73	20
BRCA	cg19751300	18	NA	44336399	rs3897629	18	44340086	A	T	0.480119	0.00294433	0.000757412	0.000101	0.212195	0.0318462	2.68e-11	0.0138756	0.00413247	0.000786	0.000786	0.729	9
BRCA	cg08474651	2	NA	201729683	rs7562391	2	201736166	C	A	0.144135	-0.00343971	0.00114622	0.00269	0.584098	0.0480568	5.44e-34	-0.00588893	0.0020213	0.00357	0.0023	0.728	20
BRCA	cg22475693	12	NA	112820488	rs79976090	12	112366118	A	C	0.0815109	0.00223663	0.00138696	0.107	0.857898	0.0576057	3.68e-50	0.0026071	0.00162615	0.109	0.00719	0.725	20
BRCA	cg05216056	6	NA	28887836	rs3129102	6	29205336	T	C	0.166998	0.00376219	0.00106147	0.000394	-0.51948	0.0436337	1.11e-32	-0.00724222	0.00213196	0.000681	0.00444	0.725	20
BRCA	cg05533539	17	NA	44104521	rs2243967	17	44329636	C	T	0.234592	-0.00345662	0.000913564	0.000155	-0.227184	0.0388354	4.92e-09	0.0152151	0.00478907	0.00149	0.00149	0.725	12
BRCA	cg00419702	22	NA	38485294	rs138683183	22	38508249	A	G	0.0109344	-0.000792397	0.00492821	0.872	2.57437	0.231867	1.22e-28	-0.000307802	0.00191454	0.872	0.00248	0.724	3
BRCA	cg14694744	3	NA	39234137	rs17729892	3	39234170	A	G	0.115308	0.00400288	0.00112316	0.000365	-0.799195	0.0453375	1.51e-69	-0.00500864	0.0014338	0.000477	0.00456	0.724	20
BRCA	cg05460289	10	NA	133558389	rs9419625	10	133534954	T	G	0.326044	-0.00224994	0.000827352	0.00654	-0.391273	0.0348107	2.59e-29	0.00575031	0.00217552	0.00821	0.00352	0.722	20
BRCA	cg13228314	10	NA	95360210	rs11187532	10	95344533	A	G	0.0735586	0.00412852	0.00141982	0.00364	-0.93126	0.0614192	6.28e-52	-0.00443326	0.00155241	0.00429	0.00642	0.721	12
BRCA	cg06645033	1	NA	50890678	rs4926555	1	50933830	G	A	0.475149	0.00228738	0.000757	0.00251	0.235711	0.0322013	2.48e-13	0.00970417	0.00347443	0.00522	0.00522	0.719	20
BRCA	cg15815827	20	NA	61546407	rs6010786	20	61544714	T	C	0.515905	0.00220908	0.000756941	0.00352	0.333405	0.0323224	6.03e-25	0.00662582	0.00235946	0.00498	0.00498	0.718	20
BRCA	cg23391368	13	NA	111670600	rs2893386	13	111658067	C	T	0.32008	-0.00259588	0.000810307	0.00136	0.230221	0.0342116	1.7e-11	-0.0112756	0.00389818	0.00382	0.00382	0.716	16
BRCA	cg12563239	10	NA	27389666	rs7083768	10	27371463	T	C	0.21173	0.00282081	0.0010244	0.00589	-0.286361	0.0445746	1.32e-10	-0.00985054	0.00389207	0.0114	0.00997	0.715	16
BRCA	cg19563365	11	NA	86508399	rs76649955	11	86512373	A	G	0.12326	-0.00403882	0.00113667	0.000381	-0.422251	0.0485069	3.18e-18	0.00956497	0.00290755	0.001	0.001	0.714	20
BRCA	cg15699386	1	NA	155161211	rs2070803	1	155157715	G	A	0.414513	0.00270884	0.00076448	0.000395	-0.221538	0.0316699	2.65e-12	-0.0122274	0.00386824	0.00157	0.000569	0.713	20
BRCA	cg18842300	6	NA	9399598	rs214449	6	9403446	T	C	0.121272	0.00346675	0.00114671	0.0025	-0.366895	0.0511407	7.27e-13	-0.00944889	0.00339161	0.00534	0.00534	0.713	5
BRCA	cg13411656	3	NA	141121016	rs4683605	3	141094769	A	C	0.425447	0.00347399	0.000761206	5.02e-06	-0.297529	0.0328217	1.25e-19	-0.0116761	0.00286437	4.57e-05	4.57e-05	0.713	17
BRCA	cg15548613	22	NA	38610795	rs6001031	22	38556260	G	T	0.370775	-0.0026694	0.000783998	0.000662	-0.290472	0.0340551	1.47e-17	0.00918987	0.00290615	0.00157	0.00157	0.712	20
BRCA	cg26355894	11	NA	1940611	rs2734498	11	1943214	C	T	0.385686	0.00240263	0.000769666	0.0018	0.216449	0.0330036	5.44e-11	0.0111002	0.00393814	0.00482	0.00482	0.711	6
BRCA	cg04590610	19	NA	44303858	rs349053	19	44302624	C	T	0.479125	0.00252601	0.000757268	0.000851	-0.219855	0.0325761	1.49e-11	-0.0114894	0.00384214	0.00279	0.00279	0.711	20
BRCA	cg22234529	1	NA	3616498	rs1122723	1	3594105	G	A	0.416501	-0.00233117	0.00076324	0.00226	-0.287318	0.0322745	5.47e-19	0.00811355	0.00280843	0.00386	0.00691	0.71	5
BRCA	cg03270340	6	NA	28891204	rs148696809	6	28934352	C	T	0.0695825	-0.00117276	0.00117356	0.318	-1.2501	0.0445468	2.8e-173	0.000938133	0.000939368	0.318	0.00355	0.71	20
BRCA	cg11909912	17	NA	43974919	rs62062280	17	44093993	T	C	0.240557	-0.00362002	0.000904135	6.23e-05	0.2342	0.0391362	2.17e-09	-0.015457	0.00464492	0.000876	0.000876	0.708	13
BRCA	cg27055894	1	NA	3590920	rs1122723	1	3594105	G	A	0.416501	-0.00233117	0.00076324	0.00226	-0.252885	0.0322567	4.51e-15	0.0092183	0.00323909	0.00443	0.00443	0.706	5
BRCA	cg07237996	7	NA	97882137	rs9641237	7	98015868	A	G	0.244533	-0.00281014	0.000883237	0.00146	-0.210158	0.037823	2.75e-08	0.0133716	0.00484297	0.00576	0.00576	0.703	6
BRCA	cg13027206	14	NA	91866325	rs1285805	14	91821393	G	A	0.0159046	-0.00667157	0.00267401	0.0126	0.730146	0.101238	5.51e-13	-0.00913731	0.00387524	0.0184	0.00288	0.702	6
BRCA	cg23715715	11	NA	788714	rs4963153	11	791462	A	G	0.455268	0.00267405	0.000760327	0.000436	-0.268593	0.0326319	1.86e-16	-0.00995577	0.00307836	0.00122	0.00289	0.701	20
BRCA	cg23034420	21	NA	43434317	rs9974393	21	43434303	A	G	0.44831	0.00214015	0.000765566	0.00518	-0.416998	0.0311299	6.43e-41	-0.00513228	0.00187545	0.00621	0.00621	0.701	20
BRCA	cg06860998	4	NA	4398094	rs4402980	4	4402199	G	T	0.256461	0.00196338	0.000880994	0.0258	0.364464	0.0376545	3.7e-22	0.00538703	0.00248048	0.0299	0.00814	0.701	20
BRCA	cg15621731	19	NA	5074616	rs877287	19	5041989	A	G	0.328032	-0.002472	0.000828384	0.00284	-0.199086	0.036423	4.6e-08	0.0124167	0.00474065	0.00881	0.00881	0.701	4
BRCA	cg04191342	3	NA	62859289	rs35724968	3	62865877	T	A	0.428429	0.00196437	0.000775718	0.0113	-0.223277	0.0332057	1.77e-11	-0.00879791	0.00371245	0.0178	0.00994	0.7	10
BRCA	cg06433467	5	NA	67730071	rs116600738	5	67730110	A	G	0.0596421	0.00383931	0.0017015	0.024	1.34963	0.0657248	1.06e-93	0.00284471	0.0012683	0.0249	0.00522	0.699	20
BRCA	cg03144848	8	NA	142377368	rs74548148	8	142377429	C	G	0.0775348	-0.00239374	0.00138768	0.0845	-0.57509	0.0613386	6.87e-21	0.00416237	0.00245348	0.0898	0.00635	0.698	20
BRCA	cg14691671	17	NA	73642503	rs820215	17	73693810	T	C	0.364811	-0.00250635	0.000794065	0.0016	0.210051	0.0342021	8.18e-10	-0.0119321	0.00425038	0.005	0.005	0.698	15
BRCA	cg06994324	1	NA	65682156	rs12091953	1	65677507	G	A	0.0129225	0.00942846	0.0027656	0.000652	0.798397	0.117111	9.27e-12	0.0118092	0.00387291	0.00229	0.00099	0.698	6
BRCA	cg06420512	19	NA	44299940	rs56103707	19	44304188	A	G	0.408549	0.00249757	0.000764316	0.00108	-0.224112	0.0325476	5.75e-12	-0.0111443	0.00377497	0.00316	0.00316	0.698	17
BRCA	cg04132407	7	NA	130626376	rs17165310	7	130651614	G	A	0.0735586	-0.00489606	0.00138135	0.000394	0.34913	0.057493	1.26e-09	-0.0140236	0.00458119	0.00221	0.00221	0.697	10
BRCA	cg16598600	1	NA	50891456	rs2784131	1	50857713	A	T	0.483101	-0.00235078	0.000757538	0.00191	-0.200259	0.032204	5.02e-10	0.0117387	0.00422765	0.00549	0.00549	0.697	16
BRCA	cg19337854	7	NA	99768885	rs6943160	7	99872071	C	T	0.218688	0.00238427	0.000933871	0.0107	0.474756	0.0381692	1.62e-35	0.0050221	0.00200807	0.0124	0.00907	0.697	20
BRCA	cg12199011	12	NA	57026411	rs74095026	12	57011911	A	G	0.0109344	0.0118136	0.00329426	0.000336	-1.11617	0.145362	1.61e-14	-0.0105841	0.00325741	0.00116	0.00281	0.696	9
BRCA	cg24278695	3	NA	46727805	rs114264781	3	46742398	G	A	0.0208748	-0.00729991	0.00232886	0.00172	-0.62188	0.0924651	1.75e-11	0.0117385	0.00413162	0.0045	0.00535	0.695	10
BRCA	cg08642068	20	NA	31591776	rs6059013	20	31593868	A	G	0.260437	-0.00154056	0.000885734	0.082	1.36188	0.0241283	0	-0.0011312	0.000650685	0.0821	0.000191	0.693	20
BRCA	cg22941637	1	NA	155248588	rs7543234	1	155253308	T	C	0.279324	0.00375201	0.000858768	1.25e-05	-0.293124	0.0369761	2.24e-15	-0.0128001	0.0033452	0.00013	0.00013	0.693	20
BRCA	cg07515565	6	NA	1624386	rs9501745	6	1623539	T	A	0.243539	0.00232826	0.000883319	0.00839	0.493826	0.0363772	5.62e-42	0.00471474	0.00182213	0.00967	0.00744	0.691	20
BRCA	cg18948125	2	NA	31805970	rs11124272	2	32142520	A	C	0.265408	-0.00252284	0.00085147	0.00305	0.211105	0.0362894	5.98e-09	-0.0119506	0.00452643	0.00829	0.00829	0.69	20
BRCA	cg19400926	6	NA	28889996	rs3129102	6	29205336	T	C	0.166998	0.00376219	0.00106147	0.000394	-0.44752	0.0440107	2.74e-24	-0.00840675	0.00251185	0.000817	0.00385	0.688	20
BRCA	cg25072179	11	NA	57004934	rs10896599	11	57056893	A	G	0.400596	-0.00240773	0.000769824	0.00176	0.301439	0.0337263	3.97e-19	-0.00798745	0.00270568	0.00316	0.00788	0.687	20
BRCA	cg21997109	6	NA	28877723	rs142403264	6	29245760	C	T	0.511928	-0.00240976	0.00075554	0.00143	-0.814831	0.0292996	3.26e-170	0.00295737	0.000933313	0.00153	0.00159	0.687	20
BRCA	cg12845051	5	NA	1226977	rs4975542	5	1222480	T	C	0.0497018	-0.00479303	0.00170472	0.00493	-0.489227	0.0721887	1.23e-11	0.00979715	0.0037725	0.0094	0.0094	0.687	6
BRCA	cg18618334	10	NA	44881054	rs4556492	10	44891681	A	G	0.190855	0.00313954	0.000938001	0.000817	0.233318	0.0391488	2.53e-09	0.0134561	0.00461089	0.00352	0.00352	0.685	4
BRCA	cg04140974	6	NA	18387360	rs72832417	6	18393026	C	G	0.219682	0.0024695	0.00090049	0.0061	0.256973	0.0367623	2.75e-12	0.00960996	0.00376425	0.0107	0.00754	0.685	9
BRCA	cg21304766	4	NA	37654566	rs16993769	4	37653940	A	G	0.368787	-0.00243157	0.000809874	0.00268	0.219205	0.0340653	1.24e-10	-0.0110927	0.00407697	0.00651	0.00651	0.684	11
BRCA	cg19000631	3	NA	33138515	rs11719213	3	33146367	T	C	0.351889	-0.00158181	0.000777597	0.0419	0.24012	0.0331651	4.48e-13	-0.00658758	0.00336376	0.0502	0.00497	0.683	20
BRCA	cg27045756	6	NA	28971967	rs142403264	6	29245760	C	T	0.511928	-0.00240976	0.00075554	0.00143	-0.632077	0.0304081	5.74e-96	0.00381245	0.00120932	0.00162	0.0069	0.683	20
BRCA	cg14341467	10	NA	121201554	rs1109488	10	121199647	C	T	0.471173	-0.00214369	0.000757324	0.00465	-0.254303	0.0311705	3.39e-16	0.00842967	0.00315219	0.00749	0.00749	0.683	20
BRCA	cg04248979	5	NA	178358274	rs145482299	5	178222013	G	A	0.0725646	0.00458993	0.0015696	0.00345	-0.609286	0.0581072	1.01e-25	-0.00753329	0.00267444	0.00485	0.00893	0.682	13
BRCA	cg21241889	9	NA	123690658	rs10818484	9	123661194	C	T	0.358847	0.00183589	0.000790944	0.0203	0.526033	0.0324493	4.22e-59	0.00349007	0.00151894	0.0216	0.00915	0.681	20
BRCA	cg19915738	19	NA	44952730	rs926053	19	44952075	C	G	0.0854871	0.00420833	0.00120721	0.00049	0.311824	0.0527755	3.45e-09	0.0134959	0.00449504	0.00268	0.00268	0.68	6
BRCA	cg22084563	17	NA	7255046	rs9899849	17	7234983	A	G	0.210736	-0.00322514	0.00087969	0.000246	-0.671786	0.0348622	9.64e-83	0.00480084	0.00133297	0.000316	0.00616	0.677	20
BRCA	cg23771366	11	NA	86510998	rs72969422	11	86510623	T	C	0.121272	-0.00405608	0.00113389	0.000347	-0.397264	0.0483337	2.05e-16	0.01021	0.00311285	0.00104	0.00104	0.677	20
BRCA	cg26638505	2	NA	31806183	rs2754530	2	31803403	T	C	0.302187	-0.00270357	0.000817097	0.000937	0.223576	0.0353498	2.54e-10	-0.0120924	0.00412458	0.00337	0.00337	0.677	20
BRCA	cg18971434	6	NA	28829398	rs3129102	6	29205336	T	C	0.166998	0.00376219	0.00106147	0.000394	-0.23621	0.0446064	1.19e-07	-0.0159273	0.00540744	0.00322	0.00398	0.676	3
BRCA	cg08762424	6	NA	31275881	rs114854895	6	31283342	G	C	0.110338	-0.00257047	0.00152924	0.0928	1.65977	0.0576048	1.47e-182	-0.00154869	0.000922923	0.0933	0.0091	0.675	20
BRCA	cg11019088	3	NA	99462341	rs73150300	3	99424120	A	C	0.055666	0.00494798	0.00141836	0.000486	0.388303	0.0642253	1.49e-09	0.0127426	0.00421715	0.00251	0.00937	0.674	10
BRCA	cg26114352	4	NA	8495623	rs2386228	4	8491336	T	C	0.493042	-0.00199832	0.000757421	0.00833	-0.342079	0.0324356	5.28e-26	0.00584169	0.0022824	0.0105	0.00732	0.673	20
BRCA	cg11296826	1	NA	40236125	rs79473113	1	40020020	A	C	0.0407555	-0.00286587	0.00187487	0.126	0.59623	0.0832632	8.02e-13	-0.00480665	0.00321539	0.135	0.00136	0.672	5
BRCA	cg01684562	6	NA	80713632	rs239556	6	80720742	A	T	0.441352	0.00255105	0.000766916	0.00088	-0.24234	0.0324396	7.99e-14	-0.0105267	0.00346417	0.00238	0.00238	0.672	12
BRCA	cg16608348	1	NA	214724481	rs3806315	1	214724668	G	A	0.411531	0.00266467	0.000771073	0.000549	-0.255307	0.0329441	9.21e-15	-0.0104371	0.00330686	0.0016	0.0037	0.671	20
BRCA	cg06857708	5	NA	77890684	rs1441710	5	77883756	C	G	0.507952	-0.0024242	0.000756693	0.00136	0.240788	0.0320196	5.48e-14	-0.0100678	0.00341586	0.0032	0.00197	0.671	11
BRCA	cg02773041	1	NA	40204384	rs12094291	1	40226046	A	G	0.356859	0.00297386	0.000781105	0.000141	0.645703	0.0306531	1.67e-98	0.00460562	0.0012293	0.000179	0.000246	0.668	20
BRCA	cg20943251	7	NA	94059900	rs9649190	7	94069696	T	C	0.285288	0.00286393	0.000825629	0.000523	-0.595148	0.0331402	4.12e-72	-0.00481213	0.00141291	0.00066	0.00689	0.667	20
BRCA	cg20424709	10	NA	37940673	rs4934908	10	38015360	C	T	0.100398	-0.00242248	0.00135121	0.073	-0.769781	0.0540106	4.33e-46	0.00314697	0.00176915	0.0753	0.00196	0.667	3
BRCA	cg10596925	17	NA	11923892	rs3764432	17	11910224	C	A	0.257455	0.00288	0.000858388	0.000793	-0.328527	0.0365957	2.78e-19	-0.0087664	0.00278936	0.00167	0.00167	0.666	12
BRCA	cg15423357	2	NA	25149977	rs10182458	2	25150641	G	A	0.465209	-0.00235736	0.000757381	0.00186	0.751282	0.0299402	5.97e-139	-0.00313778	0.00101584	0.00201	0.000321	0.666	20
BRCA	cg00826902	1	NA	3563954	rs12027041	1	3591448	C	G	0.410537	-0.00226014	0.000769424	0.00331	0.247805	0.0326323	3.11e-14	-0.00912064	0.00332916	0.00615	0.00615	0.665	5
BRCA	cg06224893	2	NA	25526639	rs34635462	2	25526632	T	C	0.398608	-0.00189442	0.000775505	0.0146	-0.750515	0.0292436	2.93e-145	0.00252416	0.00103797	0.015	0.00655	0.665	20
BRCA	cg24838240	19	NA	14721367	rs8111607	19	14718826	T	G	0.341948	-0.00307296	0.000801383	0.000126	0.229295	0.0330735	4.12e-12	-0.0134018	0.00399396	0.000792	0.000792	0.665	10
BRCA	cg05492839	6	NA	80657430	rs239540	6	80673329	T	A	0.0735586	0.00372256	0.00150698	0.0135	0.845416	0.063992	7.55e-40	0.00440323	0.00181342	0.0152	0.00439	0.664	20
BRCA	cg15081220	20	NA	49640143	rs6020919	20	49640177	G	C	0.477137	-0.00306953	0.000773695	7.27e-05	0.389811	0.0303986	1.21e-37	-0.00787441	0.00207762	0.000151	0.000151	0.661	13
BRCA	cg12193277	22	NA	39547181	rs139390	22	39532853	A	G	0.411531	-0.00299847	0.00077281	0.000104	0.204204	0.0336808	1.34e-09	-0.0146837	0.0044931	0.00108	0.00108	0.66	6
BRCA	cg27084654	3	NA	141118615	rs13098180	3	141091595	A	T	0.382704	0.00358915	0.000785829	4.94e-06	-0.271805	0.0341892	1.86e-15	-0.0132049	0.00333431	7.49e-05	7.49e-05	0.659	17
BRCA	cg00009292	1	NA	50882082	rs6676515	1	50861987	A	G	0.497018	-0.00239066	0.000756053	0.00157	0.258047	0.0318176	5.05e-16	-0.00926444	0.00314472	0.00322	0.00322	0.656	20
BRCA	cg15823160	1	NA	10555257	rs1188528	1	10547687	G	A	0.291252	-0.00313639	0.000816983	0.000124	0.305934	0.0338399	1.56e-19	-0.0102519	0.00290125	0.00041	0.00041	0.655	20
BRCA	cg07365741	6	NA	170478434	rs28479658	6	170487828	A	G	0.311133	0.000379873	0.000841886	0.652	-1.32539	0.0217308	0	-0.000286612	0.000635216	0.652	0.00997	0.654	20
BRCA	cg00376553	7	NA	100073281	rs67163493	7	100023838	T	C	0.192843	0.00323799	0.000955135	0.000699	-0.390423	0.0397497	9.05e-23	-0.00829354	0.00258803	0.00135	0.00806	0.653	15
BRCA	cg23052055	1	NA	3606042	rs3765761	1	3630476	T	C	0.164016	-0.00172621	0.000981717	0.0787	0.567023	0.0423417	6.77e-41	-0.00304434	0.00174621	0.0813	0.00782	0.652	10
BRCA	cg04346806	7	NA	100660545	rs12539994	7	100659983	T	G	0.207753	0.00278736	0.000962621	0.00378	0.465762	0.039995	2.42e-31	0.00598452	0.0021297	0.00495	0.00495	0.651	20
BRCA	cg16537028	16	NA	84853380	rs931536	16	84853352	G	C	0.180915	0.00377682	0.00101388	0.000195	-0.268982	0.0436665	7.28e-10	-0.0140412	0.00440496	0.00143	0.00143	0.651	5
BRCA	cg18515655	7	NA	100026757	rs11771241	7	99994785	A	G	0.192843	0.00325699	0.000955325	0.000651	-0.709099	0.0372472	8.32e-81	-0.00459314	0.00136867	0.000791	0.00135	0.65	20
BRCA	cg17250082	6	NA	31275875	rs114854895	6	31283342	G	C	0.110338	-0.00257047	0.00152924	0.0928	1.54236	0.0591037	4.06e-150	-0.00166658	0.000993548	0.0935	0.00537	0.649	20
BRCA	cg00017475	9	NA	136131707	rs8176725	9	136132617	A	G	0.114314	-0.00183121	0.00134514	0.173	-0.529599	0.0527415	1e-23	0.00345773	0.00256316	0.177	0.00693	0.648	20
BRCA	cg05202729	10	NA	133837125	rs9419257	10	133831989	A	G	0.230616	-0.00244826	0.00089602	0.00629	0.219423	0.040221	4.89e-08	-0.0111577	0.00456708	0.0146	0.00183	0.647	4
BRCA	cg16059665	5	NA	81576371	rs226198	5	81573992	C	T	0.234592	-0.00296444	0.000876995	0.000724	-0.212792	0.0369564	8.52e-09	0.0139312	0.00477908	0.00356	0.00356	0.645	10
BRCA	cg25382128	12	NA	54346509	rs1838173	12	54342822	T	C	0.139165	-0.00370437	0.00109524	0.000719	0.920812	0.0431369	4.22e-101	-0.00402294	0.00120427	0.000836	0.00482	0.645	20
BRCA	cg20240791	1	NA	226068334	rs360092	1	226063446	C	A	0.341948	0.00196594	0.000785737	0.0123	-0.387703	0.0342809	1.18e-29	-0.00507074	0.00207565	0.0146	0.00663	0.645	20
BRCA	cg00428598	17	NA	7153814	rs929229	17	7105399	A	G	0.357853	-0.0015116	0.000787128	0.0548	-0.214479	0.033247	1.11e-10	0.00704778	0.00382911	0.0657	0.00627	0.643	16
BRCA	cg00477157	2	NA	203879925	rs6709618	2	203818575	A	G	0.0497018	-0.00431078	0.00161898	0.00775	-0.566196	0.0671332	3.34e-17	0.00761358	0.00299851	0.0111	0.00977	0.642	20
BRCA	cg07233700	1	NA	28261706	rs11247727	1	28263134	A	G	0.275348	0.00259792	0.000844993	0.00211	0.648765	0.0350707	2.11e-76	0.00400441	0.00132033	0.00242	0.00329	0.642	20
BRCA	cg22861286	1	NA	54757003	rs35527464	1	54769868	T	C	0.178926	0.00271865	0.000937409	0.00373	0.263907	0.040372	6.28e-11	0.0103015	0.00388594	0.00803	0.00711	0.64	8
BRCA	cg11453546	21	NA	43990049	rs116974550	21	43987814	A	G	0.136183	-0.0013939	0.00110747	0.208	-1.13452	0.0379585	2.78e-196	0.00122863	0.000977022	0.209	0.00905	0.639	20
BRCA	cg24053715	22	NA	38214548	rs5750501	22	38215597	A	G	0.360835	-0.00244397	0.000800431	0.00226	0.498822	0.0347129	7.99e-47	-0.00489948	0.00164047	0.00282	0.00122	0.639	20
BRCA	cg02061173	5	NA	77805555	rs1005993	5	77815461	G	A	0.262425	-0.00256049	0.000847403	0.00251	0.283776	0.0351532	6.88e-16	-0.00902293	0.0031885	0.00466	0.00466	0.637	19
BRCA	cg04058799	7	NA	151547969	rs6975127	7	151545886	T	C	0.198807	0.00272805	0.000989529	0.00583	-0.337851	0.0413087	2.87e-16	-0.00807471	0.00309082	0.00899	0.00899	0.635	5
BRCA	cg26679405	11	NA	66247800	rs17580784	11	66214859	A	T	0.242545	-0.00265052	0.000884657	0.00273	-0.27751	0.037275	9.7e-14	0.00955108	0.0034363	0.00544	0.00544	0.635	13
BRCA	cg26034531	1	NA	99469577	rs3913779	1	99573292	A	G	0.498012	-0.00109913	0.000759987	0.148	-0.780532	0.0293305	4.98e-156	0.00140818	0.000975115	0.149	0.00749	0.634	20
BRCA	cg23085049	12	NA	54780195	rs11170900	12	54829504	T	C	0.122266	-0.00392241	0.0011691	0.000793	0.524159	0.049109	1.36e-26	-0.00748324	0.00233803	0.00137	0.00137	0.633	6
BRCA	cg12936121	6	NA	10382738	rs668495	6	10382559	G	A	0.281312	0.00249903	0.000844136	0.00307	0.190183	0.0355653	8.92e-08	0.0131401	0.00507335	0.0096	0.0096	0.632	10
BRCA	cg26380291	10	NA	114787843	rs11196183	10	114750264	A	G	0.146123	0.00418487	0.0010822	0.00011	0.313082	0.0464679	1.61e-11	0.0133667	0.00398547	0.000797	0.000797	0.632	3
BRCA	cg00175403	1	NA	12223543	rs590368	1	12223451	A	G	0.379722	0.00164999	0.000774082	0.033	-0.39474	0.0336401	8.51e-32	-0.00417994	0.00199308	0.036	0.00723	0.631	20
BRCA	cg03509193	11	NA	129309495	rs6590387	11	129309511	T	A	0.310139	0.00195699	0.000838181	0.0196	0.817866	0.0333028	3.51e-133	0.0023928	0.00102946	0.0201	0.00656	0.63	20
BRCA	cg02078626	1	NA	44063259	rs143832821	1	44052083	T	C	0.027833	-0.00652353	0.00231764	0.00488	-0.888076	0.105959	5.23e-17	0.00734569	0.00275297	0.00762	0.00498	0.629	11
BRCA	cg10802414	1	NA	155252776	rs1052176	1	155260383	T	G	0.280318	0.00373625	0.00085704	1.3e-05	0.439179	0.0351124	6.77e-36	0.00850735	0.0020666	3.84e-05	5.19e-05	0.629	20
BRCA	cg14356550	1	NA	18808102	rs61760672	1	18813746	C	T	0.132207	-0.00141195	0.0010789	0.191	-0.752822	0.0438011	3.31e-66	0.00187554	0.00143729	0.192	0.00501	0.628	20
BRCA	cg14382719	9	NA	124291856	rs9775994	9	124317454	T	C	0.168986	-0.00334588	0.00101268	0.000953	0.24929	0.0436446	1.12e-08	-0.0134216	0.00469292	0.00424	0.00424	0.627	6
BRCA	cg12584718	7	NA	100028402	rs73405353	7	100091215	A	G	0.195825	0.00348117	0.000959811	0.000287	0.349134	0.038252	7.03e-20	0.00997087	0.00295822	0.00075	0.00149	0.624	12
BRCA	cg10715272	1	NA	39981410	rs79473113	1	40020020	A	C	0.0407555	-0.00286587	0.00187487	0.126	0.610542	0.0830715	1.99e-13	-0.00469398	0.00313654	0.135	0.00192	0.623	5
BRCA	cg26123414	11	NA	69490316	rs678653	11	69466737	C	G	0.341948	-0.00279439	0.000789435	0.000401	-0.249235	0.0333977	8.48e-14	0.0112119	0.00350569	0.00138	0.00202	0.623	8
BRCA	cg16006724	18	NA	44335109	rs8087201	18	44342475	T	C	0.507952	-0.00305171	0.000756018	5.42e-05	0.407815	0.0314244	1.64e-38	-0.00748307	0.00194143	0.000116	0.00252	0.622	20
BRCA	cg13855924	6	NA	39281183	rs34179517	6	39281456	C	A	0.124254	0.00406359	0.00116303	0.000476	0.664929	0.0488191	3.03e-42	0.00611131	0.00180574	0.000713	0.00032	0.619	20
BRCA	cg19869422	17	NA	2186014	rs9899330	17	2185827	A	T	0.238569	0.00283107	0.00092907	0.00231	0.353693	0.0390893	1.45e-19	0.00800431	0.00277173	0.00388	0.00388	0.619	20
BRCA	cg12912872	11	NA	330536	rs6598039	11	330973	T	C	0.406561	0.00265709	0.00076354	0.000501	-0.524573	0.0314916	2.67e-62	-0.00506524	0.00148697	0.000658	0.00236	0.618	9
BRCA	cg23228279	1	NA	7757374	rs3011928	1	7752828	A	G	0.455268	0.00234131	0.000762995	0.00215	0.580862	0.0310063	2.63e-78	0.00403075	0.00133106	0.00246	0.0049	0.617	20
BRCA	cg24983858	10	NA	80887603	rs4979845	10	80890674	C	T	0.132207	0.0059282	0.00103556	1.04e-08	1.09307	0.0403441	1.17e-161	0.00542344	0.000968303	2.13e-08	4.18e-07	0.617	5
BRCA	cg16528597	1	NA	145013480	rs10494240	1	145551515	G	A	0.328032	0.00235992	0.000799313	0.00315	-0.368693	0.0340228	2.31e-27	-0.00640077	0.00224699	0.00439	0.00372	0.616	14
BRCA	cg02916147	16	NA	25227102	rs146206983	16	25210408	T	C	0.0367793	-0.00786661	0.00225986	0.0005	0.593392	0.103499	9.85e-09	-0.013257	0.00445538	0.00293	0.00433	0.614	4
BRCA	cg27410952	3	NA	98620265	rs79664284	3	98686834	T	G	0.0447316	0.00488048	0.00165061	0.00311	-0.423136	0.0648516	6.81e-11	-0.0115341	0.00428275	0.00708	0.00708	0.614	13
BRCA	cg18574813	11	NA	72381308	rs878277	11	72370260	A	G	0.151093	0.00275294	0.0010646	0.00971	0.754954	0.0438674	2.24e-66	0.0036465	0.00142598	0.0106	0.0088	0.614	20
BRCA	cg26816564	1	NA	7831052	rs12084927	1	7902474	T	C	0.15507	-0.0038747	0.00104338	0.000204	0.535588	0.0433089	3.96e-35	-0.00723448	0.00203404	0.000376	0.0011	0.614	20
BRCA	cg12683342	6	NA	28557518	rs144258653	6	28596059	A	C	0.0129225	0.00742049	0.00336391	0.0274	0.950369	0.152688	4.84e-10	0.00780801	0.0037553	0.0376	0.0041	0.613	4
BRCA	cg02698668	19	NA	44261472	rs4251831	19	44169738	G	C	0.309145	0.000664146	0.000826102	0.421	-0.219496	0.0350546	3.81e-10	-0.00302578	0.00379453	0.425	0.00787	0.612	8
BRCA	cg23829380	13	NA	113674654	rs2993302	13	113674559	A	G	0.493042	0.0021246	0.000761172	0.00525	-0.263935	0.0308133	1.07e-17	-0.00804971	0.00303319	0.00796	0.00633	0.612	11
BRCA	cg01878708	2	NA	227555410	rs2396388	2	227557041	C	T	0.121272	0.00229341	0.00117456	0.0509	0.458056	0.0499952	5.09e-20	0.00500683	0.00262181	0.0562	0.00576	0.611	5
BRCA	cg13439596	1	NA	17746491	rs111932154	1	17757221	G	T	0.360835	0.00222552	0.000785414	0.0046	0.227365	0.0332205	7.69e-12	0.00978831	0.00373877	0.00884	0.00791	0.606	11
BRCA	cg24024505	6	NA	28829401	rs142403264	6	29245760	C	T	0.511928	-0.00240976	0.00075554	0.00143	0.230832	0.0327123	1.71e-12	-0.0104395	0.00359193	0.00366	0.00226	0.605	10
BRCA	cg15613012	6	NA	28887742	rs6933825	6	27890631	G	A	0.144135	0.00415634	0.00113392	0.000247	-0.332245	0.047031	1.61e-12	-0.0125099	0.00384497	0.00114	0.000379	0.603	20
BRCA	cg01860370	7	NA	158785768	rs2730242	7	158820090	A	G	0.336978	-0.00232985	0.000826815	0.00483	0.303546	0.0353131	8.27e-18	-0.00767544	0.00286648	0.00741	0.00741	0.603	20
BRCA	cg09033219	17	NA	73714598	rs9910627	17	73655529	C	T	0.410537	-0.00223904	0.000772606	0.00376	-0.185334	0.0327041	1.45e-08	0.0120811	0.0046822	0.00987	0.00987	0.602	7
BRCA	cg11139102	7	NA	100073936	rs6953749	7	100000941	T	C	0.192843	0.00324289	0.000955312	0.000687	-0.619239	0.0387585	1.85e-57	-0.0052369	0.00157716	0.000899	0.000258	0.599	20
BRCA	cg00920572	12	NA	54349349	rs1443510	12	54340841	C	T	0.143141	-0.00381562	0.00108223	0.000422	0.317476	0.0446585	1.17e-12	-0.0120186	0.00380506	0.00159	0.00159	0.599	9
BRCA	cg20773800	7	NA	99934006	rs28495773	7	99943583	T	A	0.17495	0.00347704	0.000986651	0.000425	1.08706	0.0352198	3.52e-209	0.00319857	0.00091353	0.000463	0.00127	0.598	20
BRCA	cg24373253	1	NA	99469634	rs3913779	1	99573292	A	G	0.498012	-0.00109913	0.000759987	0.148	-0.807105	0.0288942	1.06e-171	0.00136182	0.000942882	0.149	0.00982	0.598	20
BRCA	cg05606136	19	NA	18336056	rs62120388	19	18316961	T	C	0.358847	-0.00252516	0.00080941	0.00181	-0.250875	0.0344426	3.24e-13	0.0100654	0.00350983	0.00413	0.00465	0.597	20
BRCA	cg20566897	11	NA	313527	rs6598042	11	324635	A	G	0.419483	0.00277481	0.000762301	0.000273	-0.221895	0.033051	1.9e-11	-0.0125051	0.00390786	0.00137	0.00928	0.596	7
BRCA	cg20073050	4	NA	106395643	rs7655890	4	106140501	G	T	0.32008	0.00189041	0.00081385	0.0202	-0.218888	0.033274	4.76e-11	-0.00863643	0.00394309	0.0285	0.00702	0.592	20
BRCA	cg04352803	2	NA	36824275	rs5003670	2	36820220	C	T	0.383698	0.00249641	0.000793451	0.00165	-0.206157	0.0332064	5.35e-10	-0.0121093	0.00431479	0.00501	0.00501	0.589	20
BRCA	cg08591886	16	NA	81111003	rs1563075	16	81107748	C	T	0.0884692	0.00242675	0.00138729	0.0802	-1.13551	0.0571744	8.95e-88	-0.00213715	0.00122646	0.0814	0.00436	0.588	20
BRCA	cg23667466	7	NA	100026434	rs4074838	7	100032665	A	G	0.192843	0.00316994	0.000955312	0.000906	0.653835	0.03757	7.81e-68	0.00484823	0.00148741	0.00112	0.000404	0.588	20
BRCA	cg20268992	11	NA	113953621	rs74454950	11	113966612	A	G	0.0318091	0.00489882	0.00173139	0.00466	-0.800765	0.0795756	8.06e-24	-0.00611768	0.00224601	0.00645	0.00723	0.586	11
BRCA	cg21692434	1	NA	162219640	rs6677052	1	162219739	G	A	0.168986	0.00358556	0.00103083	0.000505	-0.855036	0.0434889	4.65e-86	-0.00419346	0.00122432	0.000614	0.00505	0.585	20
BRCA	cg12713012	4	NA	3471816	rs13104157	4	3366950	T	C	0.413519	0.000926507	0.000768219	0.228	0.299524	0.032337	2e-20	0.00309326	0.00258645	0.232	0.00995	0.584	20
BRCA	cg08912051	6	NA	30227783	rs141152243	6	29905029	G	A	0.0447316	0.00609677	0.00184264	0.000937	0.522727	0.0786285	2.97e-11	0.0116634	0.0039375	0.00306	0.0037	0.584	9
BRCA	cg11286122	11	NA	118477406	rs7125115	11	118478330	A	G	0.380716	0.00229282	0.00078471	0.00348	-0.229875	0.0340909	1.55e-11	-0.0099742	0.00372034	0.00734	0.00734	0.584	11
BRCA	cg07394400	1	NA	17752023	rs4920606	1	17748288	A	G	0.352883	0.00220612	0.000787549	0.00509	0.27373	0.0337938	5.5e-16	0.00805947	0.00304429	0.00811	0.00944	0.583	19
BRCA	cg07625630	6	NA	31382118	rs3132092	6	31342076	T	C	0.0944334	0.0041312	0.00136116	0.0024	-0.300966	0.056148	8.31e-08	-0.0137265	0.0051973	0.00826	0.00826	0.583	3
BRCA	cg15271054	20	NA	62077647	rs4809562	20	62075203	C	T	0.131213	0.00364423	0.00107365	0.000688	-0.684536	0.0450637	4.09e-52	-0.00532365	0.00160711	0.000924	0.00282	0.582	20
BRCA	cg27095915	6	NA	1624442	rs2012025	6	1626544	A	G	0.402584	0.00144107	0.000775685	0.0632	0.479657	0.0315019	2.37e-52	0.00300438	0.00162916	0.0652	0.0098	0.582	20
BRCA	cg10329579	1	NA	17754830	rs12122129	1	17772148	A	G	0.354871	0.00232673	0.000786919	0.00311	-0.291128	0.0323589	2.32e-19	-0.00799212	0.00284523	0.00497	0.00633	0.581	20
BRCA	cg06950634	11	NA	304351	rs7937786	11	332857	A	C	0.415507	-0.00276017	0.000775328	0.000371	-0.29504	0.0337744	2.42e-18	0.00935524	0.00283771	0.000978	0.00376	0.578	8
BRCA	cg10792727	6	NA	12013467	rs9470720	6	12003004	C	T	0.116302	-0.00304023	0.00119887	0.0112	0.628869	0.049669	9.7e-37	-0.00483444	0.00194425	0.0129	0.00878	0.578	20
BRCA	cg03178042	16	NA	68544012	rs12919831	16	68529792	G	C	0.473161	-0.00185827	0.000761993	0.0147	0.309138	0.0329679	6.79e-21	-0.00601113	0.00254689	0.0183	0.003	0.574	20
BRCA	cg07242267	20	NA	33460843	rs8122889	20	33424151	A	G	0.439364	-0.00237284	0.000778827	0.00231	-0.196394	0.0321408	9.94e-10	0.012082	0.00443124	0.0064	0.0064	0.573	14
BRCA	cg07276962	2	NA	45159145	rs7569203	2	45154418	C	A	0.314115	0.0026069	0.000820223	0.00148	0.192296	0.0347456	3.12e-08	0.0135567	0.00491874	0.00585	0.00585	0.572	7
BRCA	cg17968037	7	NA	100024898	rs28629346	7	100044551	C	T	0.195825	0.003227	0.000954794	0.000725	-0.628931	0.0395069	4.64e-57	-0.00513093	0.00155196	0.000946	0.000307	0.57	20
BRCA	cg19768442	20	NA	62076131	rs4809565	20	62085978	T	C	0.287276	0.00255912	0.000827851	0.00199	-0.196474	0.0356021	3.42e-08	-0.0130252	0.00482956	0.007	0.007	0.57	4
BRCA	cg11635197	11	NA	66193993	rs11227506	11	66279546	C	T	0.300199	-0.00257195	0.000830551	0.00196	-0.223794	0.0354191	2.64e-10	0.0114925	0.00413298	0.00542	0.00542	0.57	4
BRCA	cg04226366	20	NA	61561020	rs1883848	20	61528306	G	A	0.387674	-0.00187495	0.000772107	0.0152	0.526616	0.0322373	5.51e-60	-0.00356037	0.00148228	0.0163	0.00432	0.566	20
BRCA	cg04204831	5	NA	6583394	rs13160312	5	6592190	G	A	0.210736	0.0027842	0.000932805	0.00284	0.424972	0.0398159	1.36e-26	0.00655149	0.00227919	0.00405	0.00226	0.564	20
BRCA	cg06382028	17	NA	5676269	rs4985685	17	5669796	C	G	0.464215	-0.00218921	0.000761947	0.00406	-0.338648	0.0323318	1.14e-25	0.00646456	0.00233308	0.00559	0.00559	0.564	20
BRCA	cg19229077	17	NA	997374	rs4968160	17	998784	G	A	0.150099	-0.00365272	0.00114929	0.00148	0.449338	0.0486476	2.54e-20	-0.00812911	0.00270492	0.00265	0.0079	0.563	7
BRCA	cg02079741	2	NA	25390424	rs7590512	2	25406403	T	C	0.200795	0.0028986	0.00098464	0.00324	-0.404177	0.0424119	1.58e-21	-0.00717161	0.00254975	0.00491	0.0067	0.562	20
BRCA	cg01829889	14	NA	79032495	rs10132376	14	79032392	T	C	0.0337972	-0.00492615	0.00240249	0.0403	-1.95658	0.0815695	3.83e-127	0.00251773	0.00123238	0.0411	0.00915	0.56	20
BRCA	cg01127300	22	NA	38614796	rs4821752	22	38579394	G	A	0.328032	-0.00282338	0.000813324	0.000518	0.250883	0.0353788	1.33e-12	-0.0112538	0.00360944	0.00182	0.00473	0.56	18
BRCA	cg23726566	6	NA	7051754	rs7769136	6	7052225	T	C	0.143141	-0.00252131	0.00108606	0.0203	0.620315	0.0467809	3.95e-40	-0.00406456	0.00177745	0.0222	0.00843	0.559	20
BRCA	cg23926148	11	NA	304037	rs7937786	11	332857	A	C	0.415507	-0.00276017	0.000775328	0.000371	-0.263883	0.0340555	9.29e-15	0.0104598	0.00323341	0.00122	0.00161	0.557	6
BRCA	cg12527440	19	NA	13908134	rs12611231	19	13911902	G	A	0.184891	-0.00397786	0.000970456	4.15e-05	-0.466728	0.0412474	1.1e-29	0.00852287	0.0022115	0.000116	0.000974	0.554	20
BRCA	cg01198111	7	NA	92032975	rs4727273	7	92006929	G	A	0.084493	-0.00555072	0.00134181	3.52e-05	-1.2002	0.0541925	1.12e-108	0.00462483	0.00113732	4.77e-05	0.00361	0.554	20
BRCA	cg26666804	11	NA	75141627	rs571632	11	75124132	C	T	0.427435	-0.00220343	0.000769636	0.0042	0.195019	0.0321555	1.32e-09	-0.0112985	0.00436408	0.00963	0.00963	0.554	3
BRCA	cg00515669	19	NA	44307449	rs62116990	19	44301608	A	G	0.409543	0.00254257	0.000763425	0.000867	-0.305708	0.0324248	4.17e-21	-0.00831699	0.00264846	0.00169	0.00733	0.554	20
BRCA	cg05683203	13	NA	111670642	rs7986981	13	111679288	G	T	0.300199	-0.0025292	0.000816044	0.00194	0.302186	0.0349998	5.93e-18	-0.00836968	0.00286919	0.00353	0.00353	0.552	20
BRCA	cg07589064	11	NA	65585931	rs112971520	11	65641496	A	G	0.0775348	0.00328011	0.00149716	0.0285	0.34775	0.0595064	5.1e-09	0.00943238	0.00459789	0.0402	0.00544	0.55	20
BRCA	cg11955198	11	NA	1918783	rs7102920	11	1917872	G	A	0.485089	-0.00218456	0.000760142	0.00405	0.292077	0.0331475	1.24e-18	-0.0074794	0.00273747	0.00629	0.00391	0.549	20
BRCA	cg23141851	3	NA	14615941	rs6798424	3	14648833	G	T	0.0934394	-0.00479574	0.00129216	0.000206	0.346249	0.058778	3.84e-09	-0.0138506	0.0044108	0.00169	0.00266	0.547	5
BRCA	cg22929787	5	NA	141737266	rs10061008	5	141744512	A	G	0.33499	-0.00334192	0.000798022	2.82e-05	-0.255917	0.0330943	1.05e-14	0.0130586	0.00354618	0.000231	0.000579	0.547	15
BRCA	cg11988722	20	NA	33416959	rs6142276	20	33620332	C	T	0.486083	-0.00238666	0.000763219	0.00177	-0.193907	0.0330308	4.35e-09	0.0123083	0.0044596	0.00578	0.00578	0.546	12
BRCA	cg08179530	6	NA	36648295	rs3176320	6	36646788	G	A	0.336978	0.00236713	0.000806472	0.00333	0.203995	0.0331504	7.57e-10	0.0116039	0.00438009	0.00807	0.00807	0.544	14
BRCA	cg14136781	9	NA	124087974	rs398720	9	124095271	A	C	0.209742	0.00272273	0.000908268	0.00272	-0.424672	0.0381806	9.73e-29	-0.00641137	0.00221507	0.0038	0.00816	0.543	20
BRCA	cg27608154	2	NA	111881810	rs73954941	2	111890379	G	T	0.0705765	0.00710108	0.00154444	4.27e-06	-1.50991	0.0610033	3e-135	-0.00470298	0.00104037	6.17e-06	0.000152	0.542	11
BRCA	cg03878208	11	NA	72483293	rs77106637	11	72478320	A	G	0.173956	0.00294348	0.000995575	0.00311	0.849712	0.0406424	4.62e-97	0.00346409	0.00118332	0.00342	0.00701	0.538	20
BRCA	cg23587532	11	NA	790669	rs7107271	11	784775	G	T	0.473161	-0.00235453	0.000763649	0.00205	0.227725	0.0328736	4.29e-12	-0.0103394	0.00367054	0.00485	0.00594	0.538	20
BRCA	cg04538289	11	NA	72305989	rs382163	11	72292796	T	C	0.299205	0.00133796	0.000822949	0.104	-0.42489	0.0349875	6.17e-34	-0.00314896	0.00195413	0.107	0.00285	0.538	20
BRCA	cg24170529	20	NA	48956351	rs62203522	20	48958144	A	G	0.192843	0.00346689	0.000971398	0.000358	-0.401665	0.0420658	1.32e-21	-0.0086313	0.00258184	0.000829	0.000739	0.536	20
BRCA	cg19502266	11	NA	816594	rs6597978	11	817286	G	C	0.44831	-0.00316107	0.000766046	3.68e-05	-0.362436	0.033106	6.81e-28	0.00872173	0.00225876	0.000113	0.000961	0.535	20
BRCA	cg05726668	16	NA	68732104	rs3114398	16	68706933	G	A	0.262425	-0.00266474	0.000860936	0.00197	-0.208366	0.0372861	2.29e-08	0.0127887	0.00472327	0.00678	0.00678	0.535	9
BRCA	cg03417975	17	NA	44259482	rs62057144	17	43901558	G	A	0.239563	-0.00358888	0.00090415	7.21e-05	0.269233	0.0392438	6.86e-12	-0.01333	0.00387983	0.000591	0.000591	0.535	15
BRCA	cg07639694	17	NA	7254909	rs3809823	17	7234299	G	C	0.212724	-0.00322659	0.000880317	0.000247	-0.843537	0.0331437	6.9e-143	0.00382507	0.00105437	0.000286	0.0044	0.535	20
BRCA	cg17942617	5	NA	81327376	rs4293895	5	81425592	C	T	0.230616	-0.00315711	0.000867975	0.000275	0.383634	0.0373082	8.42e-25	-0.00822948	0.00239988	0.000606	0.00388	0.534	20
BRCA	cg09907170	2	NA	111877177	rs73954941	2	111890379	G	T	0.0705765	0.00710108	0.00154444	4.27e-06	0.813862	0.0651452	8.15e-36	0.00872516	0.00202211	1.6e-05	9.63e-05	0.534	7
BRCA	cg17054360	7	NA	91510326	rs1122308	7	91617607	A	C	0.382704	0.00240266	0.000777163	0.00199	0.186939	0.0335815	2.6e-08	0.0128526	0.00475541	0.00688	0.00688	0.533	4
BRCA	cg07429038	7	NA	138482826	rs6945259	7	138485954	G	T	0.38171	-0.000742536	0.000773859	0.337	-0.464572	0.0334368	6.89e-44	0.00159832	0.00166971	0.338	0.00542	0.531	20
BRCA	cg02416781	5	NA	82331856	rs80293647	5	82332254	G	A	0.026839	-0.00633784	0.00217072	0.0035	-0.792705	0.0894909	8.15e-19	0.00799521	0.00288329	0.00556	0.00556	0.53	9
BRCA	cg11748187	10	NA	114713108	rs7094463	10	114711983	A	G	0.456262	-0.00196957	0.000759572	0.00951	-0.316051	0.0318955	3.81e-23	0.00623181	0.00248425	0.0121	0.00221	0.53	18
BRCA	cg01961447	22	NA	38221095	rs5750501	22	38215597	A	G	0.360835	-0.00244397	0.000800431	0.00226	-0.281249	0.0343198	2.51e-16	0.0086897	0.00303711	0.00422	0.00422	0.529	20
BRCA	cg23351853	3	NA	182510881	rs74661186	3	182516522	C	T	0.0636183	-0.00453661	0.00146432	0.00195	0.330431	0.0603926	4.47e-08	-0.0137294	0.00509266	0.00702	0.00702	0.528	6
BRCA	cg17804348	1	NA	3649473	rs12757620	1	3540024	G	T	0.428429	-0.00171566	0.000764528	0.0248	0.206597	0.0332852	5.41e-10	-0.00830438	0.00393501	0.0348	0.00914	0.527	8
BRCA	cg03164928	16	NA	89005932	rs3809591	16	88994656	T	C	0.354871	0.00255949	0.000783752	0.00109	0.555775	0.0317044	8.47e-69	0.00460526	0.00143446	0.00133	0.00829	0.525	20
BRCA	cg01827761	1	NA	18806854	rs1360920	1	18805698	T	C	0.151093	-0.00214911	0.0010062	0.0327	-0.557112	0.0418328	1.83e-40	0.00385759	0.00182918	0.035	0.00361	0.525	20
BRCA	cg00605270	1	NA	28261552	rs34884228	1	28255704	C	G	0.272366	0.002828	0.000844354	0.00081	0.454188	0.035876	9.86e-37	0.0062265	0.001923	0.0012	0.0036	0.525	20
BRCA	cg13663945	5	NA	81600712	rs862245	5	81585737	C	A	0.298211	-0.00229969	0.000822598	0.00518	0.252447	0.036248	3.3e-12	-0.00910959	0.00351123	0.00948	0.00948	0.52	20
BRCA	cg24939811	11	NA	45793222	rs10769170	11	45813232	T	C	0.404573	0.00206565	0.00079801	0.00964	-0.483704	0.0327392	2.14e-49	-0.00427048	0.00167492	0.0108	0.00394	0.518	20
BRCA	cg10210594	1	NA	208132787	rs2785632	1	208132904	C	G	0.40159	-0.00212521	0.000781857	0.00656	0.364034	0.0326207	6.43e-29	-0.00583794	0.00221055	0.00827	0.00421	0.515	20
BRCA	cg05164926	17	NA	7255624	rs8081264	17	7235316	C	G	0.210736	-0.00327259	0.000878995	0.000197	-0.984538	0.0308849	5.45e-223	0.00332399	0.000898868	0.000217	0.000861	0.515	20
BRCA	cg03666441	17	NA	7254671	rs9899849	17	7234983	A	G	0.210736	-0.00322514	0.00087969	0.000246	-0.751087	0.034312	3.24e-106	0.00429396	0.00118754	0.000299	0.00103	0.515	20
BRCA	cg00415782	6	NA	168980554	rs6455536	6	168976450	T	C	0.388668	-0.00207053	0.000777284	0.00773	-0.372363	0.031905	1.79e-31	0.00556051	0.00214112	0.0094	0.00534	0.514	20
BRCA	cg03102898	8	NA	36427309	rs7835510	8	36427319	G	A	0.0914513	-0.0010591	0.0013197	0.422	-1.28354	0.0540914	1.81e-124	0.00082514	0.00102876	0.423	0.000837	0.514	20
BRCA	cg18633340	19	NA	39929516	rs1865090	19	39932023	C	T	0.204771	-0.00269651	0.0010307	0.00889	-1.08247	0.0421295	1.37e-145	0.00249107	0.000957097	0.00925	0.00173	0.514	20
BRCA	cg27107076	2	NA	25050844	rs55701159	2	25139596	G	T	0.10338	-0.00206253	0.00119694	0.0849	-0.797553	0.0475267	3.35e-63	0.00258607	0.00150866	0.0865	0.0018	0.513	20
BRCA	cg06636551	8	NA	101224915	rs2439454	8	101218406	T	C	0.360835	0.00212634	0.000787537	0.00693	1.07186	0.0253416	0	0.00198379	0.000736234	0.00705	0.00539	0.513	20
BRCA	cg23332955	17	NA	77904095	rs4476208	17	77907009	C	T	0.304175	-0.00200534	0.000814227	0.0138	0.304826	0.03429	6.13e-19	-0.00657864	0.00277174	0.0176	0.00534	0.512	10
BRCA	cg00394844	19	NA	18343302	rs1075403	19	18384950	T	G	0.360835	0.00231149	0.000784543	0.00322	-0.24745	0.0331552	8.43e-14	-0.00934124	0.00340862	0.00613	0.00613	0.512	20
BRCA	cg20893579	22	NA	38215064	rs5995502	22	38217935	C	T	0.365805	-0.00251292	0.000796729	0.00161	0.477967	0.034755	4.92e-43	-0.00525752	0.00171019	0.00211	0.00335	0.509	20
BRCA	cg01412404	3	NA	14289162	rs73031113	3	14289163	A	G	0.132207	0.00272718	0.00111058	0.0141	-1.78194	0.0283649	0	-0.00153046	0.000623718	0.0141	0.000643	0.509	20
BRCA	cg04054921	11	NA	1918276	rs7102920	11	1917872	G	A	0.485089	-0.00218456	0.000760142	0.00405	0.352752	0.0328193	6.03e-27	-0.00619291	0.00223059	0.0055	0.000738	0.509	20
BRCA	cg03982355	17	NA	7255542	rs8081264	17	7235316	C	G	0.210736	-0.00327259	0.000878995	0.000197	-0.279562	0.0269661	3.5e-25	0.0117061	0.00334079	0.000458	0.00391	0.508	12
BRCA	cg10224600	17	NA	43975063	rs112197756	17	44154105	G	A	0.240557	-0.00360692	0.000903894	6.6e-05	0.30095	0.0390667	1.32e-14	-0.0119851	0.00338251	0.000395	0.000395	0.507	17
BRCA	cg11475788	11	NA	790761	rs61876744	11	820754	T	C	0.423459	-0.00295213	0.000771518	0.00013	0.212819	0.0333349	1.72e-10	-0.0138716	0.00422649	0.00103	0.00433	0.504	6
BRCA	cg24530480	8	NA	1008155	rs1669692	8	546851	C	G	0.0149105	0.00301766	0.00315004	0.338	-1.66609	0.129534	7.35e-38	-0.00181122	0.00189591	0.339	0.00947	0.502	14
BRCA	cg13306870	22	NA	39527583	rs139394	22	39538214	A	C	0.411531	-0.00301589	0.00077011	9e-05	1.31994	0.0157383	0	-0.00228487	0.000584079	9.16e-05	0.00524	0.502	20
BRCA	cg22633036	10	NA	123355576	rs2901293	10	123212302	G	A	0.483101	-0.000847707	0.000755216	0.262	1.15291	0.0210619	0	-0.000735276	0.00065519	0.262	0.000184	0.501	20
BRCA	cg14006905	9	NA	36736771	rs10738976	9	36736811	T	C	0.32008	-0.00190837	0.000813904	0.019	-0.245659	0.0342853	7.77e-13	0.00776837	0.00348603	0.0259	0.00698	0.501	4
BRCA	cg01860897	1	NA	90309605	rs7542239	1	90312742	G	A	0.256461	-0.00063391	0.000855432	0.459	0.565825	0.0359116	6.24e-56	-0.00112033	0.0015135	0.459	0.0087	0.5	8
BRCA	cg10748355	3	NA	62861796	rs7650464	3	62822091	T	C	0.256461	-0.00259343	0.000879464	0.00319	0.217626	0.0380741	1.09e-08	-0.0119169	0.00454729	0.00878	0.00857	0.499	8
BRCA	cg18566515	10	NA	123356236	rs2901293	10	123212302	G	A	0.483101	-0.000847707	0.000755216	0.262	1.14059	0.0216673	0	-0.000743218	0.000662278	0.262	0.00205	0.499	20
BRCA	cg26838691	2	NA	24397539	rs10192600	2	24396680	G	A	0.300199	-0.00305336	0.000819571	0.000195	-0.578476	0.0293025	9.49e-87	0.00527828	0.00144178	0.000251	0.000705	0.497	20
BRCA	cg19076895	6	NA	7633299	rs6922113	6	7637904	T	C	0.307157	0.00249573	0.000807781	0.002	-0.351181	0.0335919	1.4e-25	-0.00710668	0.00239853	0.00305	0.00475	0.494	20
BRCA	cg02210151	10	NA	123356041	rs2901293	10	123212302	G	A	0.483101	-0.000847707	0.000755216	0.262	1.20079	0.019561	0	-0.000705958	0.000629038	0.262	0.00141	0.493	20
BRCA	cg07044115	10	NA	123100181	rs2901293	10	123212302	G	A	0.483101	-0.000847707	0.000755216	0.262	1.22959	0.0183493	0	-0.000689422	0.000614288	0.262	3.4e-05	0.493	20
BRCA	cg07663732	19	NA	41882741	rs34503210	19	41879783	A	G	0.412525	0.00175655	0.000779071	0.0242	0.394949	0.0330318	5.99e-33	0.00444754	0.00200735	0.0267	0.00779	0.492	17
BRCA	cg06521357	4	NA	3486380	rs10007398	4	3523863	G	A	0.400596	-0.00233563	0.000770842	0.00245	-0.201631	0.0326034	6.24e-10	0.0115837	0.00425722	0.00651	0.00648	0.49	20
BRCA	cg01418618	19	NA	12377078	rs11880217	19	12418795	T	C	0.16998	0.00206808	0.00101193	0.041	0.627597	0.0446528	7.18e-45	0.00329524	0.00162934	0.0431	0.00382	0.489	20
BRCA	cg06791446	10	NA	123355268	rs2901293	10	123212302	G	A	0.483101	-0.000847707	0.000755216	0.262	1.21689	0.0188313	0	-0.000696618	0.000620705	0.262	0.00181	0.488	20
BRCA	cg09527270	2	NA	25390385	rs76645364	2	25393388	G	A	0.204771	0.00303183	0.000980449	0.00199	-0.513813	0.0412381	1.24e-35	-0.00590065	0.00196607	0.00269	0.00307	0.487	20
BRCA	cg10372770	19	NA	12377156	rs115658986	19	12419477	A	G	0.16998	0.00210118	0.00101291	0.038	0.667965	0.0444607	5.13e-51	0.00314564	0.0015308	0.0399	0.00448	0.487	20
BRCA	cg03070187	19	NA	6739184	rs173174	19	6740026	A	C	0.32505	-0.0023404	0.000814161	0.00405	0.267089	0.0355519	5.79e-14	-0.00876262	0.00326381	0.00726	0.00726	0.487	6
BRCA	cg17938612	4	NA	4860698	rs112564802	4	4870137	T	A	0.0626243	0.00512496	0.00169229	0.00246	0.537518	0.0696025	1.14e-14	0.00953449	0.00338176	0.00481	0.000294	0.486	20
BRCA	cg20063906	11	NA	85929769	rs9971532	11	85929490	A	G	0.33996	-0.00265033	0.000818732	0.00121	0.393347	0.0345597	5.16e-30	-0.00673789	0.002164	0.00185	0.00587	0.485	20
BRCA	cg27191906	6	NA	29140126	rs3129102	6	29205336	T	C	0.166998	0.00376219	0.00106147	0.000394	0.338225	0.0444676	2.82e-14	0.0111233	0.00346236	0.00132	0.00132	0.485	4
BRCA	cg21537623	7	NA	100113388	rs6957928	7	100014313	A	G	0.192843	0.0032266	0.000955106	0.000729	-0.227005	0.0392521	7.33e-09	-0.0142138	0.00487267	0.00353	0.00353	0.485	5
BRCA	cg00154950	8	NA	3974030	rs2081356	8	3971254	G	T	0.257455	-0.00233065	0.000846196	0.00588	-0.717067	0.0345297	8.67e-96	0.00325025	0.00119041	0.00633	0.00524	0.484	20
BRCA	cg22678136	15	NA	25093521	rs10048019	15	25106252	T	C	0.483101	0.00228022	0.000764156	0.00285	0.302611	0.0324818	1.2e-20	0.00753515	0.00265158	0.00449	0.00635	0.484	13
BRCA	cg08079806	11	NA	65635512	rs594689	11	65635559	G	A	0.493042	0.0024227	0.000755706	0.00135	0.311987	0.0323513	5.23e-22	0.00776539	0.00255257	0.00235	0.00235	0.483	20
BRCA	cg22339091	1	NA	28261690	rs11247724	1	28251738	T	G	0.270378	0.00285097	0.000844665	0.000737	0.426803	0.0362609	5.55e-32	0.00667983	0.00205881	0.00118	0.00217	0.482	20
BRCA	cg18816098	19	NA	18335182	rs11666265	19	18292282	T	C	0.280318	0.00279081	0.000838255	0.000871	0.268098	0.0357091	6.01e-14	0.0104097	0.00342031	0.00234	0.00234	0.482	20
BRCA	cg22162848	17	NA	73717736	rs820221	17	73685302	T	C	0.363817	-0.00249342	0.000792267	0.00165	0.347689	0.0340269	1.65e-24	-0.00717141	0.0023843	0.00263	0.00263	0.481	16
BRCA	cg15106136	17	NA	79531978	rs11150796	17	79529126	C	T	0.237575	-0.00282617	0.000902946	0.00175	0.34296	0.037371	4.43e-20	-0.00824052	0.00278172	0.00305	0.00305	0.481	20
BRCA	cg00092443	20	NA	46578370	rs144106075	20	46578227	A	C	0.0198807	0.00312555	0.00248214	0.208	-2.50846	0.0786391	2.81e-223	-0.001246	0.000990278	0.208	0.00532	0.481	12
BRCA	cg15935791	1	NA	178062438	rs1855174	1	178063040	A	G	0.186879	-0.00294922	0.000971246	0.00239	0.312615	0.0419344	9e-14	-0.00943403	0.00335469	0.00492	0.00492	0.478	20
BRCA	cg15072306	17	NA	43922875	rs112480703	17	44189799	C	T	0.238569	-0.00363614	0.000912594	6.77e-05	-0.21775	0.0388059	2.01e-08	0.0166987	0.00514011	0.00116	0.00116	0.477	10
BRCA	cg07746998	6	NA	152126785	rs523736	6	152123895	G	A	0.468191	0.000356198	0.000764938	0.641	-0.286431	0.0322859	7.2e-19	-0.00124357	0.00267426	0.642	0.00785	0.477	16
BRCA	cg00779294	3	NA	87325752	rs1497411	3	87349897	T	C	0.0477137	0.00077512	0.00173836	0.656	-2.40099	0.0567201	0	-0.000322833	0.000724058	0.656	0.00432	0.476	20
BRCA	cg01066157	6	NA	152451023	rs2881823	6	152472631	G	A	0.0477137	0.00237719	0.00196949	0.227	-0.937432	0.0784286	6.29e-33	-0.00253585	0.00211163	0.23	0.00482	0.475	7
BRCA	cg02339078	5	NA	90679543	rs12110065	5	90718474	G	A	0.141153	-0.00367361	0.00105226	0.000481	0.51884	0.0436641	1.46e-32	-0.00708043	0.00211382	0.000809	0.00265	0.474	20
BRCA	cg07416664	22	NA	38221485	rs7290169	22	38218701	A	G	0.363817	-0.0024556	0.000797551	0.00208	-0.603788	0.0334942	1.2e-72	0.00406699	0.00134004	0.00241	0.00477	0.472	20
BRCA	cg01485075	19	NA	22817371	rs7245540	19	22881504	G	C	0.138171	0.00330452	0.00118506	0.0053	0.619699	0.0522689	2e-32	0.00533246	0.0019645	0.00664	0.00664	0.47	10
BRCA	cg15677087	20	NA	61584850	rs1054866	20	61571208	C	A	0.287276	-0.00165772	0.000818139	0.0427	-0.65283	0.0332709	1.01e-85	0.00253928	0.00125988	0.0439	0.00943	0.47	20
BRCA	cg17265693	17	NA	7166490	rs8067500	17	7172631	C	T	0.370775	-0.00144503	0.00077724	0.063	-0.626096	0.0321246	1.35e-84	0.002308	0.00124704	0.0642	0.00868	0.469	20
BRCA	cg19311218	19	NA	44952417	rs11882340	19	44940392	T	C	0.084493	0.00420999	0.00120531	0.000478	0.408626	0.0529237	1.15e-14	0.0103028	0.00323745	0.00146	0.00146	0.467	11
BRCA	cg02949574	10	NA	50824106	rs77066892	10	50729564	A	G	0.0159046	0.00105037	0.00342531	0.759	-3.56584	0.126593	1.45e-174	-0.000294565	0.000960647	0.759	0.00785	0.467	17
BRCA	cg14215390	20	NA	34359568	rs148527013	20	34358652	A	C	0.10835	0.0036945	0.00124461	0.00299	0.583886	0.0549725	2.37e-26	0.00632743	0.00221328	0.00425	0.00275	0.465	20
BRCA	cg02845204	11	NA	71259439	rs10792769	11	71259822	G	A	0.136183	-0.00253833	0.00121796	0.0372	0.551729	0.0527606	1.36e-25	-0.00460068	0.00225095	0.041	0.00655	0.463	14
BRCA	cg24660199	11	NA	802935	rs11246316	11	805712	A	G	0.505964	-0.00303535	0.0007591	6.37e-05	-0.25298	0.0318719	2.06e-15	0.0119984	0.00335988	0.000356	0.000356	0.461	20
BRCA	cg04717802	22	NA	42394638	rs28715885	22	42441091	G	T	0.187873	0.00109312	0.000936405	0.243	0.492943	0.0402678	1.86e-34	0.00221754	0.00190824	0.245	0.00519	0.461	20
BRCA	cg19255818	11	NA	66330936	rs75683511	11	66275026	G	A	0.239563	-0.00269261	0.000887726	0.00242	0.224336	0.0378489	3.08e-09	-0.0120026	0.00444517	0.00693	0.00693	0.458	5
BRCA	cg18376288	1	NA	8181555	rs12117182	1	8141713	A	G	0.471173	0.00219282	0.000761726	0.00399	0.39629	0.0321162	5.57e-35	0.00553337	0.00197376	0.00506	0.0061	0.458	20
BRCA	cg22410435	22	NA	38221618	rs5750501	22	38215597	A	G	0.360835	-0.00244397	0.000800431	0.00226	-0.387806	0.0343225	1.33e-29	0.00630204	0.00213803	0.0032	0.0032	0.457	20
BRCA	cg15208524	1	NA	10270712	rs61784580	1	10270496	A	G	0.282306	-0.0023002	0.000845549	0.00652	0.667284	0.0324542	6.16e-94	-0.00344711	0.00127819	0.007	0.0034	0.457	20
BRCA	cg23668028	22	NA	38479708	rs8135665	22	38476276	T	C	0.218688	0.00342091	0.000943201	0.000287	0.40533	0.0397861	2.25e-24	0.00843981	0.00247006	0.000634	0.000534	0.456	20
BRCA	cg06082804	10	NA	123277057	rs1896422	10	123210812	G	A	0.481113	-0.000942023	0.000756792	0.213	0.551466	0.0315091	1.39e-68	-0.00170822	0.00137579	0.214	0.00181	0.455	20
BRCA	cg01546563	8	NA	11567189	rs2409813	8	11570224	G	A	0.0984095	0.00283225	0.00133741	0.0342	0.799995	0.0539207	8.51e-50	0.00354033	0.00168872	0.036	0.00866	0.455	20
BRCA	cg02622846	11	NA	88096346	rs72968619	11	88104516	A	G	0.138171	-0.00183258	0.00110615	0.0976	-1.78395	0.0275157	0	0.00102726	0.000620259	0.0977	0.00371	0.454	20
BRCA	cg21023831	2	NA	218769784	rs3791936	2	218768422	G	T	0.360835	-0.000311293	0.000786217	0.692	-0.926958	0.0281273	3.49e-238	0.000335822	0.00084823	0.692	0.00968	0.454	20
BRCA	cg09470059	1	NA	182361507	rs1925829	1	182370774	A	G	0.206759	-0.00295776	0.000888178	0.000868	0.20184	0.0370064	4.92e-08	-0.014654	0.00515579	0.00448	0.00448	0.454	3
BRCA	cg21388753	2	NA	24367569	rs11125444	2	24367205	G	T	0.405567	-0.0027532	0.000770247	0.000351	-0.565288	0.0320403	1.15e-69	0.00487044	0.00139026	0.00046	0.00183	0.453	20
BRCA	cg15025640	3	NA	14183669	rs2733531	3	14185479	G	T	0.247515	0.000925947	0.000890042	0.298	-0.351039	0.0379563	2.28e-20	-0.00263773	0.00255144	0.301	0.00454	0.453	20
BRCA	cg06608359	6	NA	28831300	rs148696809	6	28934352	C	T	0.0695825	-0.00117276	0.00117356	0.318	-0.950211	0.048681	7.55e-85	0.00123421	0.00123667	0.318	0.00277	0.452	20
BRCA	cg09164108	5	NA	43007320	rs13169690	5	43013954	A	C	0.276342	0.000847242	0.000814936	0.299	0.981058	0.0292004	1.83e-247	0.0008636	0.000831068	0.299	0.00446	0.451	20
BRCA	cg06051716	6	NA	169225783	rs4315988	6	169215249	A	G	0.457256	-0.00195356	0.000762671	0.0104	-0.235349	0.0333177	1.62e-12	0.00830069	0.00344708	0.016	0.00312	0.449	16
BRCA	cg02550691	17	NA	7255736	rs3809823	17	7234299	G	C	0.212724	-0.00322659	0.000880317	0.000247	-0.984995	0.0307076	9.35e-226	0.00327574	0.000899543	0.000271	0.00126	0.448	20
BRCA	cg09055519	11	NA	1918755	rs7102920	11	1917872	G	A	0.485089	-0.00218456	0.000760142	0.00405	0.270547	0.0329621	2.25e-16	-0.0080746	0.0029769	0.00668	0.000408	0.447	20
BRCA	cg25310361	22	NA	38221670	rs139856	22	38291874	T	C	0.362823	-0.0024279	0.000794975	0.00226	-0.374154	0.0342962	1.04e-27	0.00648904	0.00220641	0.00327	0.00327	0.444	20
BRCA	cg16302441	2	NA	25391830	rs4665769	2	25403310	T	C	0.199801	0.00292968	0.000985709	0.00296	0.374063	0.0424622	1.26e-18	0.00783205	0.00278108	0.00486	0.00317	0.443	20
BRCA	cg09736934	20	NA	32232543	rs56300310	20	32161440	C	A	0.16004	0.00120505	0.00100487	0.23	-0.359164	0.0433462	1.17e-16	-0.00335515	0.00282695	0.235	0.00754	0.442	20
BRCA	cg18568145	1	NA	155225764	rs1076556	1	155234821	G	A	0.275348	0.00367168	0.000864702	2.17e-05	0.226514	0.0368324	7.75e-10	0.0162095	0.00463896	0.000475	0.000475	0.441	12
BRCA	cg06850241	22	NA	41845214	rs79009	22	41860864	C	A	0.220676	0.000546379	0.00094195	0.562	-0.917081	0.0387263	5.65e-124	-0.000595781	0.00102743	0.562	0.00142	0.441	20
BRCA	cg07703391	1	NA	40226045	rs7547787	1	40220806	A	G	0.356859	0.00299549	0.000780962	0.000125	-1.32922	0.0146062	0	-0.00225357	0.000588056	0.000127	0.00274	0.441	20
BRCA	cg09641376	6	NA	29520965	rs149543464	6	30400763	A	G	0.082505	-0.00083559	0.00108	0.439	0.489428	0.0458364	1.29e-26	-0.00170728	0.00221244	0.44	0.00335	0.439	8
BRCA	cg16273546	10	NA	123070392	rs1896422	10	123210812	G	A	0.481113	-0.000942023	0.000756792	0.213	-1.03365	0.0249747	0	0.000911356	0.000732486	0.213	0.00331	0.436	20
BRCA	cg01095658	14	NA	68036318	rs3742871	14	68036214	C	G	0.478131	-0.000983329	0.000769488	0.201	-0.958671	0.0269706	9.91e-277	0.00102572	0.00080318	0.202	0.00187	0.435	20
BRCA	cg25052156	10	NA	123355454	rs1896422	10	123210812	G	A	0.481113	-0.000942023	0.000756792	0.213	1.2058	0.0194295	0	-0.000781243	0.000627753	0.213	0.00205	0.434	20
BRCA	cg08899523	10	NA	123244591	rs1896422	10	123210812	G	A	0.481113	-0.000942023	0.000756792	0.213	-1.25188	0.0173509	0	0.000752487	0.000604614	0.213	1.45e-05	0.434	20
BRCA	cg16984944	3	NA	99979425	rs4928163	3	99943675	A	G	0.272366	-0.00270018	0.000879142	0.00213	0.232014	0.0381908	1.24e-09	-0.011638	0.0042459	0.00613	0.00613	0.433	3
BRCA	cg06994420	2	NA	66672553	rs1519103	2	66677881	G	T	0.326044	-0.00216084	0.000803229	0.00714	-0.26738	0.0339883	3.64e-15	0.00808153	0.00317487	0.0109	0.00916	0.433	6
BRCA	cg02085507	19	NA	6739192	rs173174	19	6740026	A	C	0.32505	-0.0023404	0.000814161	0.00405	0.322953	0.034672	1.22e-20	-0.00724688	0.00263831	0.00602	0.00602	0.432	10
BRCA	cg19761014	17	NA	28927070	rs426434	17	28925353	T	C	0.115308	0.00126761	0.00115641	0.273	1.0562	0.0449212	3.05e-122	0.00120016	0.00109607	0.274	0.00652	0.432	13
BRCA	cg04949981	3	NA	46796026	rs6784788	3	46866408	C	A	0.0198807	-0.0069271	0.00235012	0.0032	0.665583	0.0966169	5.62e-12	-0.0104076	0.00384055	0.00673	0.00558	0.429	20
BRCA	cg16653991	10	NA	123244536	rs1896422	10	123210812	G	A	0.481113	-0.000942023	0.000756792	0.213	-1.21695	0.0189299	0	0.000774085	0.000621993	0.213	0.00571	0.428	20
BRCA	cg03056766	5	NA	77656305	rs56373295	5	77785740	A	C	0.248509	-0.00219896	0.000873992	0.0119	0.522023	0.0351416	6.47e-50	-0.00421238	0.00169808	0.0131	0.00933	0.427	20
BRCA	cg23248910	10	NA	123270070	rs1896422	10	123210812	G	A	0.481113	-0.000942023	0.000756792	0.213	1.04053	0.0247008	0	-0.00090533	0.000727631	0.213	0.00783	0.425	20
BRCA	cg07019303	12	NA	11859760	rs11054423	12	11859731	G	A	0.355865	0.00259239	0.000789976	0.00103	-0.241907	0.0325097	9.99e-14	-0.0107165	0.00356909	0.00268	0.00268	0.423	18
BRCA	cg01248855	17	NA	29234505	rs56318904	17	29252051	T	C	0.107356	0.000750186	0.00122496	0.54	-2.0575	0.0240848	0	-0.00036461	0.000595379	0.54	0.000996	0.422	13
BRCA	cg22744587	11	NA	129321693	rs12223897	11	129321693	T	C	0.0944334	-0.00365491	0.0013702	0.00764	-1.90448	0.0425092	0	0.00191911	0.000720736	0.00775	0.00372	0.421	20
BRCA	cg00794400	1	NA	17746510	rs4920606	1	17748288	A	G	0.352883	0.00220612	0.000787549	0.00509	0.262656	0.0333553	3.42e-15	0.00839927	0.00318248	0.00831	0.00964	0.421	14
BRCA	cg26981201	5	NA	90679533	rs1541674	5	90660447	C	T	0.143141	-0.00389376	0.00105061	0.00021	1.22806	0.0386968	5.04e-221	-0.00317066	0.000861318	0.000232	0.0017	0.42	20
BRCA	cg25256661	17	NA	7137939	rs402514	17	7158203	T	G	0.364811	-0.00157524	0.000775713	0.0423	0.90185	0.0270176	2.67e-244	-0.00174668	0.000861725	0.0427	0.00722	0.418	20
BRCA	cg11430259	10	NA	123355748	rs2901293	10	123212302	G	A	0.483101	-0.000847707	0.000755216	0.262	1.00313	0.0251605	0	-0.000845062	0.000753158	0.262	0.00631	0.418	20
BRCA	cg09146183	22	NA	38610376	rs2267375	22	38601231	G	T	0.424453	-0.00227584	0.000769497	0.0031	-0.268487	0.0334114	9.3e-16	0.00847654	0.003054	0.00551	0.00551	0.416	20
BRCA	cg00966925	22	NA	38476308	rs8135665	22	38476276	T	C	0.218688	0.00342091	0.000943201	0.000287	0.429689	0.0401867	1.11e-26	0.00796136	0.00231793	0.000593	0.000352	0.415	20
BRCA	cg10736303	7	NA	158050299	rs4909162	7	158058663	T	C	0.0337972	0.00190398	0.00204443	0.352	-3.42132	0.0438994	0	-0.000556505	0.000597599	0.352	0.00667	0.414	20
BRCA	cg25671438	17	NA	7240223	rs9899849	17	7234983	A	G	0.210736	-0.00322514	0.00087969	0.000246	0.756661	0.0339833	7.96e-110	-0.00426233	0.00117825	0.000297	0.00252	0.413	20
BRCA	cg13707729	10	NA	123326490	rs1896422	10	123210812	G	A	0.481113	-0.000942023	0.000756792	0.213	0.832771	0.0288033	8.35e-184	-0.00113119	0.000909605	0.214	0.00165	0.412	20
BRCA	cg27314116	5	NA	6583850	rs555016	5	6583526	G	C	0.43837	0.00197192	0.000766892	0.0101	-0.600751	0.0314611	2.78e-81	-0.00328242	0.00128808	0.0108	0.00338	0.412	20
BRCA	cg01138706	2	NA	218768580	rs3791935	2	218768581	A	G	0.122266	0.000174126	0.00113411	0.878	-1.87537	0.0243045	0	-9.28e-05	0.000604741	0.878	0.00797	0.411	20
BRCA	cg19179910	6	NA	30955358	rs114310831	6	30965425	G	A	0.0487078	0.00467537	0.00178195	0.0087	-2.2769	0.0522915	0	-0.00205339	0.000784041	0.00882	0.00201	0.409	20
BRCA	cg13607226	9	NA	124262699	rs871672	9	124241603	C	G	0.293241	0.00282401	0.000814855	0.000529	1.18825	0.0240819	0	0.00237661	0.00068745	0.000546	0.000801	0.409	20
BRCA	cg17090593	2	NA	73144410	rs71416768	2	73144411	C	G	0.156064	-0.00278848	0.00104524	0.00764	0.792003	0.0399885	2.66e-87	-0.00352079	0.00133166	0.0082	0.007	0.409	20
BRCA	cg08260658	5	NA	132155330	rs6877026	5	132155295	A	G	0.124254	0.000120177	0.00104909	0.909	0.797446	0.0444889	7.58e-72	0.000150702	0.00131559	0.909	0.00646	0.407	20
BRCA	cg26927634	16	NA	89004858	rs522145	16	88963856	A	C	0.209742	-0.00171453	0.00101179	0.0902	-0.248861	0.0450941	3.42e-08	0.00688951	0.00425303	0.105	0.00805	0.407	9
BRCA	cg08212685	5	NA	81268071	rs324914	5	81389950	C	T	0.229622	-0.00308238	0.000868042	0.000384	1.23257	0.0262977	0	-0.00250077	0.000706272	0.000399	0.0002	0.406	20
BRCA	cg08322034	6	NA	80657412	rs186915	6	80683536	T	C	0.0735586	0.00356314	0.00151324	0.0185	0.745134	0.0626593	1.3e-32	0.00478188	0.00207026	0.0209	0.0089	0.405	16
BRCA	cg17934790	19	NA	14693742	rs4072516	19	14725135	T	G	0.340954	-0.00314618	0.00079785	8.04e-05	0.245054	0.0332143	1.61e-13	-0.0128387	0.00369167	0.000506	0.00195	0.404	13
BRCA	cg18507732	14	NA	65345681	rs7143541	14	65419777	T	G	0.128231	0.00390611	0.00126682	0.00205	-0.30974	0.0532252	5.91e-09	-0.0126109	0.00462858	0.00644	0.00644	0.404	9
BRCA	cg18147280	1	NA	10574359	rs67488812	1	10614804	G	A	0.313121	-0.00355339	0.000807084	1.07e-05	0.429372	0.034054	1.89e-36	-0.00827578	0.00199099	3.23e-05	0.000293	0.402	20
BRCA	cg06386478	8	NA	19460136	rs7828030	8	19471568	A	C	0.0695825	0.00473744	0.00133736	0.000397	0.840201	0.0542001	3.37e-54	0.00563846	0.00163274	0.000554	0.00414	0.402	20
BRCA	cg04227237	6	NA	52529066	rs1000810	6	52534931	C	T	0.285288	-0.00250411	0.000853224	0.00334	0.235319	0.0355188	3.47e-11	-0.0106413	0.00396565	0.00729	0.00729	0.402	5
BRCA	cg11503396	2	NA	25419761	rs2384092	2	25402891	C	T	0.199801	0.00292989	0.000985952	0.00296	0.578034	0.0411351	7.48e-45	0.00506872	0.00174342	0.00365	0.00305	0.4	20
BRCA	cg25899154	11	NA	72897143	rs11235676	11	72908553	T	C	0.125249	-0.000797921	0.00102753	0.437	-1.01346	0.0406281	2.43e-137	0.000787324	0.00101437	0.438	0.00601	0.399	20
BRCA	cg20102019	20	NA	17592922	rs6080761	20	17629162	A	G	0.437376	0.00116711	0.0007649	0.127	-0.817337	0.0291635	7.83e-173	-0.00142794	0.00093723	0.128	0.00222	0.399	20
BRCA	cg12940522	20	NA	62073153	rs7273219	20	62075336	G	A	0.259443	-0.00179038	0.000835036	0.032	0.309256	0.0342544	1.75e-19	-0.00578931	0.00277524	0.037	0.00955	0.398	20
BRCA	cg15124820	3	NA	126703827	rs68140350	3	126402969	G	A	0.0447316	-0.00233939	0.00188746	0.215	0.697112	0.0856629	4.02e-16	-0.00335583	0.00273877	0.22	0.00965	0.396	20
BRCA	cg27125439	10	NA	29311888	rs1775944	10	29071504	A	G	0.0785288	0.00426489	0.00137102	0.00187	0.324938	0.0562219	7.49e-09	0.0131252	0.00479166	0.00616	0.00752	0.395	8
BRCA	cg06891043	17	NA	7186718	rs5435	17	7187123	T	C	0.393638	-0.00191864	0.000783185	0.0143	-0.478999	0.0334187	1.36e-46	0.00400552	0.00165876	0.0157	0.00902	0.394	20
BRCA	cg26614154	1	NA	156893605	rs945508	1	156907081	T	C	0.44831	0.00224342	0.000758802	0.00311	0.328313	0.0318786	7.13e-25	0.00683317	0.00240456	0.00449	0.00449	0.392	20
BRCA	cg02917321	22	NA	38215204	rs8138029	22	38220964	T	C	0.363817	-0.00247132	0.000797914	0.00195	0.628936	0.0337794	2.26e-77	-0.00392937	0.00128611	0.00225	0.00148	0.392	20
BRCA	cg12795893	12	NA	57038757	rs77344413	12	57087692	T	G	0.0109344	0.0125218	0.00306667	4.44e-05	0.977659	0.141221	4.42e-12	0.0128079	0.0036417	0.000436	0.000436	0.392	4
BRCA	cg17551192	11	NA	65638483	rs570387	11	65637076	C	T	0.505964	-0.00250858	0.000754508	0.000885	-0.219772	0.032421	1.21e-11	0.0114145	0.00382386	0.00284	0.00284	0.391	14
BRCA	cg18113790	11	NA	75141722	rs478668	11	75118671	T	C	0.427435	-0.00222795	0.000769705	0.0038	0.226542	0.0309944	2.69e-13	-0.0098346	0.00365435	0.00712	0.00712	0.39	7
BRCA	cg06137072	3	NA	141087187	rs13098180	3	141091595	A	T	0.382704	0.00358915	0.000785829	4.94e-06	-0.217766	0.0340811	1.66e-10	-0.0164817	0.0044357	0.000203	0.000203	0.39	8
BRCA	cg08684066	4	NA	89299173	rs28694742	4	89299174	A	G	0.17992	-0.000533339	0.000965912	0.581	-1.38379	0.0315906	0	0.000385419	0.000698075	0.581	0.00299	0.39	20
BRCA	cg17410650	12	NA	54324560	rs10783613	12	54321966	G	T	0.337972	-0.0029383	0.00081195	0.000296	0.485759	0.0335296	1.45e-47	-0.00604888	0.00172287	0.000447	0.00248	0.388	20
BRCA	cg21827809	1	NA	3575147	rs12757620	1	3540024	G	T	0.428429	-0.00171566	0.000764528	0.0248	0.300598	0.0333309	1.91e-19	-0.00570749	0.00262091	0.0294	0.00987	0.387	14
BRCA	cg27288595	3	NA	141094238	rs9846396	3	141140968	T	C	0.420477	0.00361751	0.000765201	2.27e-06	-0.238784	0.0332455	6.85e-13	-0.0151497	0.00383645	7.85e-05	0.000385	0.386	15
BRCA	cg16971273	6	NA	29634336	rs2747421	6	29645118	C	G	0.188867	-0.00058025	0.000877652	0.509	0.259505	0.0373968	3.94e-12	-0.00223599	0.00339734	0.51	0.00819	0.385	9
BRCA	cg09769104	2	NA	24387250	rs6714652	2	24383059	C	T	0.379722	-0.00284115	0.000781908	0.000279	-0.36871	0.0333123	1.79e-28	0.00770565	0.00223201	0.000556	0.000451	0.384	20
BRCA	cg11322797	5	NA	132155450	rs11742040	5	132178700	A	G	0.158052	-7.86e-06	0.000990462	0.994	0.716926	0.0425569	1.12e-63	-1.1e-05	0.00138154	0.994	0.00597	0.383	20
BRCA	cg03970086	16	NA	88974840	rs1673932	16	88987861	C	T	0.337972	0.00212949	0.000786955	0.00681	0.537987	0.0316316	7.18e-65	0.00395826	0.00148118	0.00753	0.00713	0.382	20
BRCA	cg13334819	7	NA	99746414	rs11771139	7	99736059	A	G	0.275348	-0.00204985	0.000838336	0.0145	-0.974329	0.0300615	1.91e-230	0.00210386	0.000862869	0.0148	0.00925	0.38	20
BRCA	cg01140616	14	NA	57518666	rs10151276	14	57518535	C	T	0.353877	-0.00337541	0.000779134	1.48e-05	0.368109	0.0338528	1.54e-27	-0.00916959	0.00227839	5.71e-05	0.000423	0.379	20
BRCA	cg02230254	11	NA	65586170	rs11227318	11	65592935	A	C	0.487078	-0.00205382	0.000755736	0.00657	-0.274538	0.0322097	1.55e-17	0.007481	0.00288929	0.00962	0.00962	0.378	20
BRCA	cg03873281	5	NA	131608955	rs162881	5	131608794	G	T	0.112326	-0.000645926	0.00126633	0.61	0.912199	0.0551967	2.37e-61	-0.000708098	0.00138888	0.61	0.00407	0.377	20
BRCA	cg04660147	20	NA	62716443	rs6122248	20	62751120	C	T	0.341948	-0.00269556	0.00079408	0.000687	-0.365104	0.0338024	3.4e-27	0.00738299	0.00227982	0.0012	0.00857	0.377	20
BRCA	cg10236452	1	NA	208132590	rs2785632	1	208132904	C	G	0.40159	-0.00212521	0.000781857	0.00656	0.337956	0.0328098	7.01e-25	-0.00628842	0.00239268	0.00858	0.00858	0.375	20
BRCA	cg04570735	19	NA	18334849	rs11666033	19	18334805	T	C	0.284294	0.00284741	0.000836118	0.00066	0.567238	0.0355129	1.98e-57	0.00501978	0.00150715	0.000866	0.00134	0.374	20
BRCA	cg16269418	1	NA	155043883	rs3766916	1	155049402	T	C	0.40159	-0.00101901	0.000767894	0.185	0.378011	0.0325375	3.35e-31	-0.00269572	0.00204462	0.187	0.00609	0.373	20
BRCA	cg22371591	4	NA	4860590	rs76418652	4	4869337	T	G	0.0636183	0.00527172	0.00169425	0.00186	0.400668	0.0676535	3.17e-09	0.0131573	0.00477665	0.00588	0.00588	0.373	8
BRCA	cg18912006	12	NA	123335444	rs10847910	12	123345736	C	G	0.0636183	-0.0039372	0.00174789	0.0243	-2.42468	0.0559366	0	0.0016238	0.000721847	0.0245	0.00741	0.373	20
BRCA	cg08533745	12	NA	28124011	rs7958401	12	28316290	A	G	0.305169	-0.00339973	0.000817257	3.18e-05	-0.206377	0.0344874	2.18e-09	0.0164734	0.00482286	0.000636	0.000636	0.372	13
BRCA	cg17470251	8	NA	19459996	rs7828030	8	19471568	A	C	0.0695825	0.00473744	0.00133736	0.000397	1.06141	0.0525851	1.34e-90	0.00446335	0.00127924	0.000485	0.00292	0.371	20
BRCA	cg06521852	22	NA	38141419	rs11089854	22	38148882	A	G	0.335984	-0.0017284	0.000826638	0.0365	0.442789	0.0356141	1.73e-35	-0.00390344	0.0018931	0.0392	0.00611	0.37	20
BRCA	cg11241750	5	NA	125694354	rs10519905	5	125690163	G	C	0.185885	-0.00143594	0.000968045	0.138	0.848007	0.0394065	1.02e-102	-0.00169331	0.00114426	0.139	0.00356	0.368	20
BRCA	cg01431340	6	NA	110680085	rs3757351	6	110735630	G	A	0.421471	-0.00168267	0.00076641	0.0281	-0.531645	0.0315241	8.18e-64	0.00316503	0.00145375	0.0295	0.00147	0.367	20
BRCA	cg26682900	12	NA	123344689	rs839362	12	123277170	G	A	0.0854871	-0.00446764	0.00157924	0.00467	0.420555	0.066756	2.98e-10	-0.0106232	0.00411637	0.00986	0.00986	0.367	15
BRCA	cg09576415	20	NA	62059559	rs4809555	20	62053199	A	G	0.324056	-0.00219193	0.000797827	0.00601	-0.323134	0.0319639	5.02e-24	0.00678335	0.00255858	0.00802	0.00802	0.365	20
BRCA	cg03575189	17	NA	44344142	rs188710438	17	43573649	T	C	0.241551	-0.00368265	0.000903024	4.54e-05	-0.261844	0.0405127	1.02e-10	0.0140643	0.00407784	0.000563	0.000563	0.364	16
BRCA	cg01517384	6	NA	31323856	rs3819282	6	31322855	T	C	0.0626243	-0.00357182	0.00165868	0.0313	1.47496	0.0672263	1.07e-106	-0.00242164	0.00112996	0.0321	0.00553	0.364	20
BRCA	cg18741404	6	NA	29894253	rs1611432	6	29893501	A	T	0.263419	-0.00217513	0.000967594	0.0246	0.542884	0.0369848	8.84e-49	-0.00400662	0.0018031	0.0263	0.00254	0.364	20
BRCA	cg10637955	2	NA	201675829	rs11688852	2	201683986	G	T	0.447316	0.00249809	0.000764386	0.00108	-0.268003	0.0320132	5.68e-17	-0.00932113	0.00306178	0.00233	0.0081	0.364	20
BRCA	cg25003697	17	NA	79453611	rs11871781	17	79466845	A	G	0.241551	0.00151541	0.00087336	0.0827	0.364076	0.0380904	1.2e-21	0.00416235	0.00243805	0.0878	0.00581	0.362	20
BRCA	cg12290671	7	NA	99195819	rs1581492	7	99186826	A	G	0.104374	-0.00260318	0.00134662	0.0532	-1.11729	0.0533176	1.68e-97	0.00232991	0.00121037	0.0542	0.00495	0.362	20
BRCA	cg01758799	11	NA	1446346	rs11606681	11	1446304	C	T	0.307157	0.00104193	0.000808914	0.198	0.89382	0.0302107	2.25e-192	0.0011657	0.000905865	0.198	0.00676	0.362	20
BRCA	cg24876969	6	NA	28971902	rs142403264	6	29245760	C	T	0.511928	-0.00240976	0.00075554	0.00143	-0.316467	0.0320244	4.98e-23	0.00761457	0.00250869	0.0024	0.00313	0.36	20
BRCA	cg16187659	11	NA	308167	rs7937786	11	332857	A	C	0.415507	-0.00276017	0.000775328	0.000371	-0.256551	0.0340062	4.55e-14	0.0107588	0.0033417	0.00128	0.00128	0.358	7
BRCA	cg08198193	5	NA	81146787	rs17242130	5	81154906	C	A	0.0934394	-0.00416911	0.00122821	0.000688	-0.291346	0.0522407	2.45e-08	0.0143098	0.00493511	0.00374	0.00374	0.356	7
BRCA	cg05019671	5	NA	77943786	rs6883793	5	77917525	C	A	0.488072	-0.0024428	0.000761852	0.00134	-0.186701	0.0323159	7.59e-09	0.013084	0.00466692	0.00505	0.00505	0.356	5
BRCA	cg11830800	12	NA	41087520	rs7967298	12	41087838	C	G	0.357853	-0.000377026	0.000792281	0.634	-0.719324	0.0309586	2.02e-119	0.000524139	0.00110166	0.634	0.00438	0.355	20
BRCA	cg10493736	16	NA	88023582	rs72631404	16	87988255	T	C	0.190855	-0.00263975	0.00101669	0.00942	0.686886	0.0407869	1.22e-63	-0.00384307	0.00149763	0.0103	0.00737	0.355	20
BRCA	cg26325806	11	NA	790142	rs4963153	11	791462	A	G	0.455268	0.00267405	0.000760327	0.000436	-0.541731	0.031124	7.49e-68	-0.00493612	0.00143188	0.000566	0.00352	0.354	20
BRCA	cg09764761	17	NA	44105544	rs111541901	17	43994358	T	C	0.239563	-0.00358165	0.000904541	7.51e-05	-0.755136	0.0378172	1.04e-88	0.00474305	0.00122118	0.000103	0.000496	0.353	20
BRCA	cg06719487	1	NA	10489962	rs475549	1	10487408	A	G	0.492048	-0.00207807	0.000757461	0.00608	-0.21349	0.0330188	1.01e-10	0.00973381	0.00385417	0.0116	0.00947	0.352	13
BRCA	cg22361543	1	NA	7757378	rs947414	1	7747979	G	A	0.456262	0.00245902	0.000762187	0.00125	0.217908	0.0315646	5.07e-12	0.0112847	0.00386086	0.00347	0.00347	0.352	11
BRCA	cg00025211	1	NA	145588627	rs2449411	1	145708698	C	T	0.352883	-0.00217822	0.000790417	0.00586	-0.312975	0.0339501	3.01e-20	0.00695973	0.00263592	0.00828	0.00923	0.351	16
BRCA	cg10337079	11	NA	2158697	rs11603378	11	2165173	G	T	0.248509	-0.00257536	0.000869435	0.00306	0.49935	0.0355356	7.48e-45	-0.00515742	0.0017794	0.00375	0.000314	0.35	20
BRCA	cg09460490	13	NA	113829357	rs9549353	13	113843427	A	G	0.201789	-0.00255832	0.000953029	0.00727	0.603798	0.0406542	6.75e-50	-0.00423705	0.00160396	0.00825	0.00825	0.35	18
BRCA	cg10549753	12	NA	95226786	rs10745704	12	95226936	G	A	0.254473	-0.00154256	0.000851885	0.0702	-0.964392	0.0303352	8.57e-222	0.00159952	0.000884771	0.0706	0.0016	0.349	20
BRCA	cg21333589	4	NA	87468622	rs7661844	4	87468625	C	T	0.463221	0.00229682	0.000756422	0.00239	-0.475703	0.0311852	1.55e-52	-0.00482826	0.00162131	0.0029	0.00366	0.349	20
BRCA	cg22774211	1	NA	120439014	rs10127888	1	120498250	G	C	0.110338	0.00296428	0.00122033	0.0151	-0.544353	0.0532774	1.66e-24	-0.00544551	0.00230428	0.0181	0.00869	0.348	9
BRCA	cg20699076	19	NA	10206568	rs55752217	19	10218434	T	C	0.488072	0.000891411	0.00076253	0.242	0.569547	0.0316432	1.98e-72	0.00156512	0.00134166	0.243	0.00766	0.348	20
BRCA	cg24613691	5	NA	132155460	rs6877026	5	132155295	A	G	0.124254	0.000120177	0.00104909	0.909	0.793301	0.0443727	1.75e-71	0.00015149	0.00132246	0.909	0.00376	0.347	20
BRCA	cg13029400	3	NA	141087190	rs13098180	3	141091595	A	T	0.382704	0.00358915	0.000785829	4.94e-06	-0.236111	0.0342696	5.59e-12	-0.0152011	0.0039931	0.000141	0.000141	0.346	8
BRCA	cg11117266	17	NA	43971461	rs112073200	17	44201791	C	G	0.240557	-0.00354159	0.000904527	9.03e-05	-0.263893	0.0391486	1.58e-11	0.0134206	0.0039639	0.00071	0.00071	0.345	14
BRCA	cg21932513	1	NA	17751974	rs6688886	1	17753639	A	G	0.351889	0.00222129	0.000787288	0.00478	0.257006	0.0340119	4.15e-14	0.00864295	0.00326988	0.00821	0.00821	0.344	9
BRCA	cg22900229	2	NA	25391773	rs4665775	2	25407121	G	A	0.199801	0.0029253	0.000985081	0.00298	0.319433	0.0426837	7.22e-14	0.00915779	0.00331776	0.00578	0.00578	0.343	17
BRCA	cg16151795	11	NA	1918450	rs7102920	11	1917872	G	A	0.485089	-0.00218456	0.000760142	0.00405	0.334167	0.0328124	2.33e-24	-0.00653733	0.00236357	0.00568	0.000246	0.343	20
BRCA	cg21593952	3	NA	46801208	rs140207621	3	46714743	T	C	0.0159046	-0.00625717	0.00257069	0.0149	0.803599	0.105507	2.61e-14	-0.00778643	0.00335835	0.0204	0.00418	0.343	20
BRCA	cg17764572	10	NA	9450199	rs10905559	10	9468621	G	A	0.502982	0.00175337	0.000757393	0.0206	-0.264635	0.03317	1.49e-15	-0.00662562	0.00298008	0.0262	0.00983	0.343	10
BRCA	cg21327887	17	NA	43971928	rs199502	17	44862347	A	G	0.232604	-0.00298097	0.000925249	0.00127	0.246366	0.0386537	1.85e-10	-0.0120998	0.00420813	0.00404	0.00404	0.342	16
BRCA	cg27659974	2	NA	172430816	rs72885966	2	172430631	G	A	0.239563	0.00256428	0.000899527	0.00436	0.240088	0.038299	3.64e-10	0.0106806	0.00411586	0.00946	0.00946	0.342	11
BRCA	cg09200294	15	NA	45998079	rs8033024	15	45998096	A	G	0.394632	-0.00191368	0.000775774	0.0136	0.380784	0.0325689	1.41e-31	-0.00502563	0.00208216	0.0158	0.00228	0.341	20
BRCA	cg24075332	6	NA	151712594	rs3900024	6	151706570	G	A	0.228628	-0.00290111	0.000893969	0.00117	0.907226	0.0338359	2.31e-158	-0.00319778	0.000992579	0.00127	1.68e-06	0.34	20
BRCA	cg13689699	9	NA	137225311	rs3818734	9	137225373	A	T	0.302187	-0.00237823	0.000823517	0.00388	-0.399643	0.0346313	8.3e-31	0.00595089	0.00212418	0.00509	0.00509	0.339	20
BRCA	cg07538946	5	NA	131705188	rs200838	5	131710399	A	C	0.444334	0.00387527	0.000756572	3.02e-07	0.360171	0.0310322	3.83e-31	0.0107595	0.00229606	2.78e-06	0.000488	0.339	20
BRCA	cg14480035	9	NA	13705641	rs721577	9	13659321	G	C	0.305169	0.0024492	0.00081396	0.00262	0.208163	0.034561	1.71e-09	0.0117658	0.004371	0.00711	0.00711	0.339	19
BRCA	cg13513766	9	NA	124261246	rs17417602	9	124255900	C	T	0.338966	0.00277295	0.000794784	0.000485	0.206956	0.0331748	4.42e-10	0.0133987	0.00440016	0.00233	0.00233	0.338	10
BRCA	cg25310700	10	NA	5702083	rs9423906	10	5722020	T	C	0.26839	-2.54e-05	0.000876728	0.977	0.219783	0.0370966	3.13e-09	-0.000115387	0.00398911	0.977	0.00479	0.336	10
BRCA	cg10215330	20	NA	62046270	rs6062448	20	62059249	A	G	0.279324	-0.00229857	0.000811319	0.00461	-0.207742	0.0326083	1.88e-10	0.0110645	0.00427417	0.00963	0.00963	0.335	19
BRCA	cg09820827	13	NA	112022972	rs1183185	13	112039822	T	C	0.321074	-0.00299429	0.00082195	0.00027	-0.205265	0.034772	3.57e-09	0.0145874	0.00470544	0.00193	0.00193	0.334	9
BRCA	cg20028291	20	NA	49411856	rs75819927	20	49407624	A	G	0.0328032	-0.00730825	0.00257207	0.00449	0.980523	0.128908	2.82e-14	-0.00745342	0.00280021	0.00777	0.00777	0.334	9
BRCA	cg16166968	1	NA	120439036	rs835575	1	120456563	T	G	0.110338	0.00297957	0.00121445	0.0142	-0.557137	0.0533167	1.47e-25	-0.005348	0.00223908	0.0169	0.00803	0.333	8
BRCA	cg18232861	5	NA	132155555	rs11738148	5	132181434	G	A	0.144135	-6.17e-06	0.00099437	0.995	0.613366	0.0435845	5.56e-45	-1.01e-05	0.00162117	0.995	0.00859	0.333	20
BRCA	cg13277040	20	NA	62716332	rs6122248	20	62751120	C	T	0.341948	-0.00269556	0.00079408	0.000687	-0.274458	0.0337579	4.29e-16	0.00982139	0.00313533	0.00173	0.00729	0.332	20
BRCA	cg25511807	11	NA	102401438	rs11568818	11	102401661	C	T	0.439364	0.00254058	0.000758228	0.000806	0.489832	0.0318411	2.11e-53	0.00518664	0.00158423	0.00106	0.00635	0.33	20
BRCA	cg21705961	17	NA	44060775	rs17689882	17	43906828	A	G	0.238569	-0.00365249	0.000904852	5.42e-05	-0.736163	0.0364129	6.92e-91	0.00496152	0.00125341	7.54e-05	0.00558	0.328	20
BRCA	cg27520104	10	NA	3172590	rs2306311	10	3176389	T	C	0.293241	0.00148059	0.000804192	0.0656	-0.666418	0.0337317	7.07e-87	-0.00222171	0.00121197	0.0668	0.00628	0.327	20
BRCA	cg14190522	9	NA	124344221	rs657239	9	124330141	C	T	0.171968	-0.00317918	0.000996761	0.00143	0.569129	0.042339	3.42e-41	-0.00558604	0.00180001	0.00191	0.00118	0.327	20
BRCA	cg16124934	14	NA	75389480	rs2159906	14	75390912	A	C	0.373757	-0.00127469	0.000785293	0.105	-0.611556	0.0320003	2.05e-81	0.00208434	0.00128871	0.106	0.00477	0.327	20
BRCA	cg13565129	6	NA	28601419	rs4455662	6	28340529	G	A	0.390656	0.00144769	0.000769946	0.0601	0.239115	0.0335565	1.04e-12	0.00605437	0.00333019	0.0691	0.00743	0.325	20
BRCA	cg03490567	7	NA	43944817	rs11770438	7	43953928	C	G	0.142147	0.00205474	0.00112573	0.068	0.85631	0.0463831	4.2e-76	0.00239953	0.00132104	0.0693	0.00373	0.322	20
BRCA	cg12283302	20	NA	62113045	rs310619	20	62127521	A	G	0.360835	-0.00124179	0.00080152	0.121	-0.308507	0.0331739	1.41e-20	0.00402516	0.00263387	0.126	0.00166	0.322	7
BRCA	cg11405475	1	NA	203830200	rs60622947	1	203852963	T	C	0.241551	-0.00147774	0.000898141	0.0999	0.527774	0.0380223	8.3e-44	-0.00279995	0.00171367	0.102	0.00363	0.322	20
BRCA	cg20455175	11	NA	304191	rs7937786	11	332857	A	C	0.415507	-0.00276017	0.000775328	0.000371	-0.261742	0.0336764	7.71e-15	0.0105454	0.00325813	0.00121	0.0045	0.322	7
BRCA	cg23202277	17	NA	43971911	rs112995313	17	43795768	C	T	0.239563	-0.00359934	0.000904388	6.9e-05	0.405064	0.0375729	4.24e-27	-0.00888586	0.00237999	0.000189	0.00188	0.321	20
BRCA	cg27195326	12	NA	41087459	rs1816855	12	41103526	A	G	0.357853	-0.000363	0.000791757	0.647	-0.749734	0.0306861	7.74e-132	0.000484172	0.00105624	0.647	0.000338	0.32	20
BRCA	cg16060189	10	NA	94350577	rs11187078	10	94340705	G	C	0.364811	0.00214731	0.000795816	0.00697	0.481876	0.0330656	4.15e-48	0.00445615	0.00167956	0.00797	2.87e-05	0.319	20
BRCA	cg13032057	6	NA	30922803	rs145463269	6	30211185	G	A	0.0447316	0.00510204	0.00189143	0.00699	-0.525779	0.0781369	1.71e-11	-0.00970377	0.00387567	0.0123	0.00405	0.319	9
BRCA	cg00267207	12	NA	14849579	rs3811173	12	14849580	A	G	0.139165	-0.00299745	0.00104049	0.00397	-1.81909	0.021407	0	0.00164777	0.000572312	0.00399	0.00788	0.319	20
BRCA	cg09236382	11	NA	6676366	rs12294943	11	6679132	C	T	0.16004	0.000653181	0.00104993	0.534	-0.675361	0.0442321	1.24e-52	-0.000967158	0.00155591	0.534	0.00994	0.318	20
BRCA	cg19040266	5	NA	131723239	rs200838	5	131710399	A	C	0.444334	0.00387527	0.000756572	3.02e-07	-0.348672	0.030522	3.19e-30	-0.0111144	0.00237801	2.96e-06	8.25e-06	0.318	20
BRCA	cg06998765	14	NA	75389618	rs2159906	14	75390912	A	C	0.373757	-0.00127469	0.000785293	0.105	-0.7952	0.0307738	3.14e-147	0.00160298	0.000989488	0.105	0.00328	0.317	20
BRCA	cg09324706	12	NA	114395457	rs4767173	12	114395442	C	T	0.483101	0.00134746	0.000758684	0.0757	0.983234	0.0257565	0	0.00137044	0.000772456	0.076	0.00868	0.316	20
BRCA	cg24832985	5	NA	81148310	rs56272813	5	81131073	G	A	0.0884692	-0.00522149	0.00128277	4.69e-05	0.373323	0.0546871	8.7e-12	-0.0139865	0.00400056	0.000472	0.00312	0.316	18
BRCA	cg07879739	22	NA	38221187	rs7290169	22	38218701	A	G	0.363817	-0.0024556	0.000797551	0.00208	-0.304353	0.0345601	1.29e-18	0.00806826	0.00277602	0.00366	0.00366	0.314	20
BRCA	cg13276631	3	NA	46872239	rs75357702	3	46758380	C	T	0.0208748	-0.00852281	0.00236288	0.00031	0.58787	0.0965401	1.13e-09	-0.0144978	0.0046716	0.00191	0.00103	0.313	8
BRCA	cg08065408	6	NA	29520774	rs149543464	6	30400763	A	G	0.082505	-0.00083559	0.00108	0.439	0.588705	0.0449641	3.62e-39	-0.00141937	0.00183774	0.44	0.00881	0.313	10
BRCA	cg05868564	11	NA	123351497	rs2846059	11	123351341	T	C	0.269384	-0.00213788	0.000837653	0.0107	0.257604	0.0359643	7.91e-13	-0.00829909	0.00345196	0.0162	0.00994	0.311	9
BRCA	cg26956157	16	NA	89036698	rs2636950	16	88992195	C	T	0.390656	0.00210868	0.000767625	0.00601	-0.25883	0.0330302	4.65e-15	-0.00814697	0.0031427	0.00953	0.00832	0.31	20
BRCA	cg19829353	6	NA	139496770	rs13195460	6	139496782	G	T	0.146123	-0.00190737	0.000993774	0.0549	0.821862	0.0394318	1.78e-96	-0.00232079	0.00121429	0.056	0.00648	0.309	20
BRCA	cg14530290	10	NA	80853985	rs1250003	10	80846814	C	T	0.414513	0.00422416	0.000773289	4.69e-08	-0.307076	0.0330184	1.4e-20	-0.0137561	0.0029205	2.47e-06	1.86e-05	0.307	19
BRCA	cg23197862	8	NA	135732917	rs13262791	8	135729915	C	G	0.126243	0.00126586	0.00105206	0.229	0.417986	0.0460835	1.19e-19	0.00302847	0.00253902	0.233	0.000837	0.307	20
BRCA	cg04833845	19	NA	44286076	rs10426528	19	44299298	T	C	0.388668	0.00240266	0.000765664	0.0017	-0.196591	0.0333429	3.72e-09	-0.0122216	0.00441197	0.0056	0.0056	0.306	10
BRCA	cg27378180	15	NA	76005446	rs12908447	15	75994847	G	C	0.430417	0.00233047	0.000769437	0.00246	0.195786	0.0324606	1.62e-09	0.0119031	0.00439767	0.0068	0.0068	0.306	5
BRCA	cg14707231	5	NA	43001138	rs11742691	5	43021875	T	G	0.5	-0.000948646	0.000756097	0.21	0.25256	0.0326445	1.02e-14	-0.00375612	0.00303284	0.216	0.00954	0.305	20
BRCA	cg04999945	16	NA	10973382	rs12596540	16	10970476	G	A	0.23161	-0.00243747	0.000879437	0.00558	0.279705	0.0373254	6.7e-14	-0.00871443	0.00335232	0.00934	0.00934	0.303	11
BRCA	cg05040210	1	NA	18807594	rs1360920	1	18805698	T	C	0.151093	-0.00214911	0.0010062	0.0327	-1.05733	0.037479	4.25e-175	0.00203258	0.000954366	0.0332	0.00623	0.303	20
BRCA	cg04821375	17	NA	7227662	rs8081264	17	7235316	C	G	0.210736	-0.00327259	0.000878995	0.000197	0.266948	0.0367465	3.74e-13	-0.0122593	0.00370001	0.000922	0.00747	0.303	11
BRCA	cg09876992	22	NA	42470868	rs133367	22	42463366	C	T	0.413519	0.00270183	0.000771502	0.000462	0.195354	0.0327525	2.45e-09	0.0138304	0.00457966	0.00253	0.00253	0.303	11
BRCA	cg23762722	17	NA	43817897	rs62062279	17	44093964	C	T	0.240557	-0.00362084	0.000904103	6.2e-05	-0.607982	0.0371663	3.79e-60	0.00595551	0.00153097	0.0001	0.00242	0.302	20
BRCA	cg22577606	7	NA	91763103	rs10953069	7	91922541	C	T	0.083499	-0.00529859	0.00137157	0.000112	1.51999	0.0527157	8.11e-183	-0.00348594	0.000910418	0.000129	0.00382	0.301	20
BRCA	cg03733026	22	NA	29445468	rs13054095	22	29406219	T	A	0.0228628	0.0118956	0.002667	8.18e-06	-1.53812	0.142026	2.49e-27	-0.00773386	0.00187523	3.72e-05	0.000339	0.301	11
BRCA	cg12129983	11	NA	69462660	rs9344	11	69462910	A	G	0.497018	0.00302313	0.000761461	7.18e-05	-0.346542	0.031591	5.35e-28	-0.0087237	0.0023368	0.000189	0.000179	0.3	13
BRCA	cg23998083	1	NA	46997184	rs116078607	1	46999238	A	G	0.207753	-0.00199179	0.000952898	0.0366	-0.314666	0.0418731	5.7e-14	0.00632985	0.00314325	0.044	0.00577	0.3	20
BRCA	cg00377358	20	NA	61639277	rs2427462	20	61591049	T	C	0.492048	0.00193694	0.000761115	0.0109	0.355736	0.0325268	7.69e-28	0.00544488	0.00219671	0.0132	0.00464	0.299	20
BRCA	cg15952840	8	NA	11451312	rs77314514	8	11451467	A	G	0.0367793	0.00758827	0.00187914	5.39e-05	-0.442792	0.0807581	4.18e-08	-0.0171373	0.00527062	0.00115	0.00115	0.298	6
BRCA	cg05832509	7	NA	99515080	rs2572023	7	99474427	A	G	0.514911	0.00318445	0.000755883	2.52e-05	-0.198257	0.0310595	1.73e-10	-0.0160622	0.00456818	0.000438	0.000438	0.298	12
BRCA	cg26221543	3	NA	14615956	rs6798424	3	14648833	G	T	0.0934394	-0.00479574	0.00129216	0.000206	0.361702	0.0585821	6.65e-10	-0.0132588	0.00416819	0.00147	0.0023	0.298	6
BRCA	cg00417151	20	NA	17598356	rs6080761	20	17629162	A	G	0.437376	0.00116711	0.0007649	0.127	-0.487625	0.0325695	1.12e-50	-0.00239346	0.00157675	0.129	0.00685	0.298	20
BRCA	cg25247887	10	NA	44882599	rs11592974	10	44877501	C	T	0.190855	0.00308301	0.000939406	0.00103	-0.313698	0.039866	3.58e-15	-0.00982796	0.00324464	0.00245	0.00245	0.295	6
BRCA	cg06679265	12	NA	57040204	rs146900373	12	57063046	A	G	0.0109344	0.0120979	0.0030535	7.43e-05	4.56846	0.114841	0	0.00264814	0.000671694	8.06e-05	0.00257	0.295	14
BRCA	cg25197181	6	NA	28778382	rs142403264	6	29245760	C	T	0.511928	-0.00240976	0.00075554	0.00143	0.181225	0.0326325	2.8e-08	-0.0132971	0.00480771	0.00568	0.00568	0.293	10
BRCA	cg15697575	3	NA	156784781	rs10936058	3	156784535	T	C	0.343936	-0.00163313	0.000809584	0.0437	-1.06031	0.0286358	4.15e-300	0.00154024	0.000764667	0.044	0.00935	0.293	20
BRCA	cg21972741	5	NA	435613	rs11740891	5	435626	G	A	0.455268	-0.00217009	0.000760873	0.00434	0.375726	0.031983	7.26e-32	-0.00577572	0.0020839	0.00558	0.00415	0.293	20
BRCA	cg04515524	19	NA	17489148	rs7247270	19	17488957	T	G	0.0974155	-0.00143127	0.00138113	0.3	2.12735	0.0365004	0	-0.000672795	0.000649328	0.3	0.00624	0.292	20
BRCA	cg03407547	17	NA	7255461	rs35776863	17	7226957	A	G	0.189861	-0.00293981	0.00090271	0.00113	-0.211516	0.0367381	8.54e-09	0.0138988	0.00490326	0.00459	0.00459	0.292	4
BRCA	cg05855948	18	NA	24234966	rs1370903	18	24234799	C	A	0.461233	0.00186637	0.000766727	0.0149	0.964417	0.0266839	4.92e-286	0.00193523	0.000796817	0.0152	0.00386	0.291	20
BRCA	cg02554274	11	NA	788180	rs7942159	11	822622	A	G	0.426441	-0.00300203	0.000773093	0.000103	0.188181	0.0340684	3.32e-08	-0.0159529	0.00502184	0.00149	0.0059	0.288	15
BRCA	cg08360599	3	NA	141087261	rs13098180	3	141091595	A	T	0.382704	0.00358915	0.000785829	4.94e-06	-0.222884	0.0341804	6.99e-11	-0.0161032	0.00430456	0.000183	0.000183	0.287	7
BRCA	cg06874403	10	NA	21799047	rs7098100	10	21834536	A	G	0.355865	0.00418824	0.000797668	1.52e-07	0.210893	0.0347889	1.34e-09	0.0198595	0.00500384	7.22e-05	7.22e-05	0.286	20
BRCA	cg23596567	17	NA	11901585	rs28918118	17	11965544	T	C	0.0248509	0.00514047	0.00232631	0.0271	-0.87714	0.100218	2.09e-18	-0.00586049	0.00273537	0.0322	0.00272	0.283	8
BRCA	cg26855812	12	NA	96336499	rs4762256	12	96349832	C	T	0.245527	0.00236468	0.000863101	0.00615	0.527725	0.0343341	2.59e-53	0.00448089	0.00166129	0.00699	0.00253	0.283	20
BRCA	cg21370924	3	NA	141087313	rs13098180	3	141091595	A	T	0.382704	0.00358915	0.000785829	4.94e-06	-0.234809	0.0345775	1.12e-11	-0.0152854	0.00403321	0.000151	0.000151	0.283	8
BRCA	cg13780516	9	NA	124262551	rs871669	9	124240842	T	C	0.296223	0.00275138	0.000814689	0.000732	0.44344	0.0341359	1.39e-38	0.00620463	0.00189827	0.00108	0.0011	0.282	20
BRCA	cg16641055	16	NA	88846292	rs73251038	16	88845931	T	C	0.234592	0.00156552	0.000879084	0.0749	-0.794048	0.0368571	6.03e-103	-0.00197157	0.00111087	0.0759	0.00643	0.282	20
BRCA	cg24591105	1	NA	230415225	rs6698963	1	230415025	G	A	0.455268	-0.00151633	0.000757965	0.0454	-0.412306	0.0321513	1.2e-37	0.00367768	0.00186059	0.0481	0.00927	0.281	20
BRCA	cg17646820	3	NA	66848679	rs13096599	3	66848809	C	T	0.178926	0.00105079	0.000969109	0.278	1.30126	0.0327681	0	0.000807517	0.000745024	0.278	0.00231	0.281	20
BRCA	cg26757472	16	NA	86387131	rs1728376	16	86379009	A	C	0.158052	-0.000956052	0.00104189	0.359	-0.51275	0.0429224	6.81e-33	0.00186456	0.00203795	0.36	0.00372	0.279	20
BRCA	cg25351996	5	NA	131563782	rs12521097	5	131575338	A	G	0.4334	0.00348275	0.00075745	4.27e-06	-0.248757	0.0305963	4.28e-16	-0.0140006	0.00349815	6.27e-05	6.27e-05	0.277	20
BRCA	cg20198768	6	NA	29635579	rs2747429	6	29648377	C	T	0.188867	-0.00067791	0.000877778	0.44	0.744075	0.0354843	1.25e-97	-0.000911078	0.00118049	0.44	0.00377	0.276	20
BRCA	cg21875845	11	NA	3078852	rs450817	11	3056712	G	A	0.394632	-0.00187392	0.000773941	0.0155	-0.282108	0.0323883	3.03e-18	0.00664256	0.00284745	0.0197	0.00418	0.276	20
BRCA	cg15966229	18	NA	44337664	rs8087201	18	44342475	T	C	0.507952	-0.00305171	0.000756018	5.42e-05	-0.27551	0.0320742	8.72e-18	0.0110766	0.00303195	0.000259	0.000259	0.275	20
BRCA	cg15936446	5	NA	42952369	rs3893725	5	42951941	G	A	0.387674	0.000505052	0.000766273	0.51	-0.375346	0.0323449	3.91e-31	-0.00134556	0.0020448	0.511	0.0094	0.274	20
BRCA	cg21182715	12	NA	95567919	rs10859844	12	95573040	G	T	0.333996	-0.00240902	0.000790534	0.00231	-0.220111	0.0333465	4.09e-11	0.0109446	0.00395579	0.00566	0.00566	0.273	9
BRCA	cg10770076	3	NA	100210880	rs6763178	3	100220049	A	G	0.16501	0.00253802	0.00101787	0.0127	-1.02223	0.0438328	2.71e-120	-0.00248283	0.00100141	0.0132	2.41e-05	0.272	20
BRCA	cg10647703	6	NA	29708958	rs1362126	6	29691019	A	G	0.439364	0.00115404	0.000772835	0.135	0.606069	0.0314562	1.01e-82	0.00190414	0.00127898	0.137	0.00725	0.272	20
BRCA	cg10234998	6	NA	29601491	rs149851804	6	29622760	A	G	0.054672	0.00224637	0.00159222	0.158	0.69404	0.0676491	1.07e-24	0.00323666	0.00231572	0.162	0.00795	0.271	11
BRCA	cg13269645	6	NA	28864832	rs148696809	6	28934352	C	T	0.0695825	-0.00117276	0.00117356	0.318	1.01512	0.0454327	1.4e-110	-0.00115529	0.00115724	0.318	0.00431	0.271	20
BRCA	cg24997140	11	NA	86572390	rs74568188	11	86572402	A	C	0.126243	-0.00391327	0.00110731	0.000409	0.301269	0.047259	1.83e-10	-0.0129893	0.00420249	0.002	0.002	0.27	8
BRCA	cg04459545	19	NA	17375685	rs8112782	19	17374726	C	G	0.172962	-0.00232119	0.00101874	0.0227	0.295371	0.0441108	2.14e-11	-0.00785856	0.00364322	0.031	0.00181	0.27	8
BRCA	cg01710897	15	NA	91497902	rs8041774	15	91499813	A	G	0.203777	-0.00321122	0.000935944	0.000601	0.310017	0.0405651	2.13e-14	-0.0103582	0.00330929	0.00175	0.00175	0.27	20
BRCA	cg15975171	5	NA	1239687	rs2853693	5	1250463	C	T	0.319085	0.0019624	0.000791445	0.0132	0.498659	0.0333987	2.09e-50	0.00393535	0.00160888	0.0144	0.00239	0.27	10
BRCA	cg09233782	19	NA	18343636	rs12460047	19	18346228	A	G	0.287276	0.0027468	0.00084858	0.00121	0.341006	0.0353242	4.75e-22	0.00805499	0.00262463	0.00215	0.00777	0.269	20
BRCA	cg12423553	21	NA	47541643	rs2236492	21	47551164	A	G	0.166004	-0.0031334	0.00102783	0.0023	-0.236051	0.0416577	1.46e-08	0.0132743	0.00494444	0.00726	0.00726	0.269	10
BRCA	cg10783149	14	NA	55707866	rs17128438	14	55858297	T	C	0.0149105	0.0158653	0.00483569	0.00103	-1.29061	0.213851	1.59e-09	-0.0122929	0.0042647	0.00395	0.00395	0.269	8
BRCA	cg11201654	6	NA	29690766	rs2735059	6	29695854	A	G	0.481113	0.00174104	0.000763314	0.0226	0.889153	0.0274825	1.24e-229	0.00195809	0.000860604	0.0229	0.00409	0.269	20
BRCA	cg22509504	17	NA	19322114	rs12602013	17	19362790	A	C	0.266402	0.00257711	0.000829188	0.00188	-0.195489	0.0354222	3.41e-08	-0.0131829	0.00486798	0.00677	0.00677	0.267	3
BRCA	cg24937747	5	NA	1882902	rs6876836	5	1882900	C	T	0.262425	-0.00124875	0.000909376	0.17	-0.329712	0.0406091	4.69e-16	0.0037874	0.00279726	0.176	0.00787	0.266	9
BRCA	cg09379755	3	NA	62861925	rs11130901	3	62873406	G	A	0.520875	0.00145609	0.000757635	0.0546	-0.383014	0.0321283	9.16e-33	-0.00380166	0.00200363	0.0578	0.00445	0.266	20
BRCA	cg02451508	20	NA	17595472	rs6080761	20	17629162	A	G	0.437376	0.00116711	0.0007649	0.127	-0.633647	0.0315277	7.67e-90	-0.00184189	0.00121061	0.128	0.00138	0.266	20
BRCA	cg04204221	2	NA	121279483	rs115623144	2	121280121	T	C	0.0467197	0.00161827	0.00181594	0.373	-0.979663	0.0773261	8.76e-37	-0.00165186	0.00185822	0.374	0.00243	0.264	19
BRCA	cg09667013	22	NA	42394590	rs9607869	22	42418110	A	T	0.281312	0.00137634	0.00082677	0.096	0.592221	0.0339199	2.92e-68	0.00232403	0.00140238	0.0975	0.00689	0.263	20
BRCA	cg21230535	21	NA	47556290	rs17357592	21	47542779	T	C	0.188867	-0.00280129	0.000950256	0.0032	-0.253814	0.0393151	1.08e-10	0.0110368	0.00411576	0.00733	0.00733	0.262	17
BRCA	cg03954353	17	NA	43715162	rs113790915	17	43810782	C	G	0.239563	-0.00358771	0.000904241	7.26e-05	0.504387	0.0385659	4.37e-39	-0.00711301	0.00187343	0.000147	0.00608	0.261	20
BRCA	cg08451469	6	NA	29711588	rs885945	6	29696852	T	C	0.186879	-0.000865002	0.00087959	0.325	-1.02524	0.0317852	2.97e-228	0.000843707	0.000858334	0.326	0.00547	0.261	20
BRCA	cg05772917	17	NA	44027251	rs112155389	17	43758078	A	G	0.239563	-0.0035945	0.000904204	7.03e-05	0.303643	0.0394199	1.33e-14	-0.0118379	0.00335104	0.000411	0.000411	0.261	17
BRCA	cg06902929	6	NA	32123258	rs138950925	6	31226075	C	T	0.0526839	0.00650789	0.00181589	0.000339	-0.439671	0.0732786	1.97e-09	-0.0148017	0.00481079	0.00209	0.00209	0.259	10
BRCA	cg00937691	6	NA	29796105	rs145043018	6	29751401	C	G	0.290258	0.000304388	0.00080231	0.704	-0.535089	0.0336849	8.03e-57	-0.000568855	0.00149982	0.704	0.00376	0.258	20
BRCA	cg19825988	3	NA	141146295	rs724016	3	141105570	G	A	0.423459	0.00366882	0.000761448	1.45e-06	0.192188	0.0323539	2.85e-09	0.0190897	0.00510147	0.000183	0.000183	0.258	3
BRCA	cg00688402	20	NA	61591209	rs2427462	20	61591049	T	C	0.492048	0.00193694	0.000761115	0.0109	-1.1678	0.0215117	0	-0.00165862	0.000652467	0.011	0.00236	0.258	20
BRCA	cg09848074	7	NA	139172610	rs6977197	7	139173139	C	T	0.120278	0.00254178	0.00114086	0.0259	-0.324851	0.0488112	2.83e-11	-0.00782445	0.00370351	0.0346	0.00956	0.258	12
BRCA	cg08022543	3	NA	195929544	rs76531186	3	195934884	C	A	0.258449	-0.00128893	0.000848044	0.129	0.433638	0.0353403	1.31e-34	-0.00297236	0.0019706	0.131	0.00661	0.257	20
BRCA	cg11427534	5	NA	132155233	rs11738148	5	132181434	G	A	0.144135	-6.17e-06	0.00099437	0.995	0.932366	0.0415792	2.3e-111	-6.62e-06	0.0010665	0.995	0.00212	0.257	20
BRCA	cg06046490	11	NA	320940	rs6598042	11	324635	A	G	0.419483	0.00277481	0.000762301	0.000273	0.584298	0.0313122	1.04e-77	0.00474896	0.00132923	0.000353	0.00383	0.257	14
BRCA	cg06576557	20	NA	31828749	rs6059171	20	31818704	A	G	0.228628	0.0032971	0.000853138	0.000111	0.261615	0.0345265	3.53e-14	0.0126029	0.00366072	0.000576	0.000137	0.256	11
BRCA	cg14901243	19	NA	13951845	rs62122064	19	13950206	G	A	0.232604	-0.00314453	0.000917717	0.000611	-0.299737	0.0384835	6.77e-15	0.010491	0.00334492	0.00171	0.00171	0.256	19
BRCA	cg14035860	14	NA	55707715	rs75141260	14	55736417	G	A	0.0149105	0.0154293	0.00473004	0.00111	-1.31117	0.219169	2.2e-09	-0.0117676	0.00410891	0.00418	0.00418	0.255	9
BRCA	cg21082868	6	NA	22828849	rs11757211	6	22737762	T	G	0.055666	-0.00503342	0.00185919	0.00678	0.46508	0.0805087	7.62e-09	-0.0108227	0.00441481	0.0142	0.00778	0.254	9
BRCA	cg08106288	2	NA	220007315	rs57040597	2	219997423	G	A	0.0417495	0.00321145	0.00200876	0.11	-2.95326	0.069756	0	-0.00108743	0.000680669	0.11	0.00654	0.254	20
BRCA	cg24674445	1	NA	156076363	rs915179	1	156078249	G	A	0.383698	0.000673597	0.000769608	0.381	1.099	0.0240226	0	0.000612918	0.000700408	0.382	0.00311	0.253	20
BRCA	cg00147172	22	NA	46423604	rs4072455	22	46422938	C	T	0.303181	0.00176423	0.000815963	0.0306	0.679928	0.0319824	2.69e-100	0.00259473	0.00120626	0.0315	0.00791	0.253	20
BRCA	cg00314115	2	NA	121280002	rs115623144	2	121280121	T	C	0.0467197	0.00161827	0.00181594	0.373	-1.04799	0.0769706	3.24e-42	-0.00154417	0.00173649	0.374	0.00936	0.253	19
BRCA	cg17330252	12	NA	69809627	rs34946242	12	69775107	C	T	0.0457256	-0.00103553	0.00188692	0.583	-0.875378	0.0772579	9.26e-30	0.00118295	0.00215808	0.584	0.00244	0.252	19
BRCA	cg01388598	10	NA	79166065	rs35806	10	79165830	G	A	0.402584	0.00183167	0.000769872	0.0174	-0.250973	0.0322498	7.13e-15	-0.00729828	0.0032077	0.0229	0.00347	0.251	17
BRCA	cg25310676	1	NA	10575953	rs602601	1	10567058	C	T	0.472167	-0.00227356	0.000758949	0.00274	0.262567	0.0326756	9.32e-16	-0.00865897	0.00308483	0.005	0.005	0.25	20
BRCA	cg07475394	17	NA	79466438	rs11871781	17	79466845	A	G	0.241551	0.00151541	0.00087336	0.0827	0.644247	0.0368546	2.01e-68	0.00235222	0.00136229	0.0842	0.00672	0.25	20
BRCA	cg25024717	12	NA	54324583	rs7138907	12	54324576	C	T	0.338966	-0.00292928	0.000809508	0.000296	0.341737	0.0335526	2.31e-24	-0.00857174	0.00251386	0.00065	0.00424	0.248	16
BRCA	cg26191576	14	NA	75389716	rs2159906	14	75390912	A	C	0.373757	-0.00127469	0.000785293	0.105	-0.580089	0.0325187	3.54e-71	0.0021974	0.00135934	0.106	0.00292	0.247	20
BRCA	cg09310112	19	NA	4969989	rs12609484	19	4970593	T	G	0.306163	0.00114071	0.000818829	0.164	0.298503	0.0341497	2.31e-18	0.00382144	0.00277774	0.169	0.00709	0.247	20
BRCA	cg14999934	19	NA	4362037	rs10407203	19	4354810	A	G	0.455268	-0.00216349	0.000762462	0.00455	-0.197063	0.031567	4.3e-10	0.0109787	0.00425006	0.00979	0.00979	0.246	12
BRCA	cg16313393	20	NA	49636733	rs6063583	20	49652148	T	C	0.404573	-0.00299103	0.000784271	0.000137	-0.327276	0.0325742	9.46e-24	0.00913917	0.0025632	0.000363	0.000363	0.245	11
BRCA	cg15232539	8	NA	19459672	rs13261887	8	19461590	T	A	0.0745527	0.00434945	0.00130569	0.000865	0.946974	0.0534308	2.77e-70	0.004593	0.00140294	0.00106	0.00595	0.243	20
BRCA	cg18982073	17	NA	42275458	rs2521602	17	42336424	A	G	0.0188867	0.00778326	0.00256575	0.00242	0.727292	0.106878	1.01e-11	0.0107017	0.00386247	0.00559	0.00559	0.242	5
BRCA	cg21313071	20	NA	49640589	rs6063583	20	49652148	T	C	0.404573	-0.00299103	0.000784271	0.000137	-0.191967	0.0327546	4.61e-09	0.015581	0.00487428	0.00139	0.00139	0.242	3
BRCA	cg03834261	12	NA	96336532	rs4762643	12	96343753	T	C	0.244533	0.00217762	0.000864641	0.0118	0.878098	0.0323026	1.02e-162	0.00247993	0.000988892	0.0121	0.000902	0.239	20
BRCA	cg20683267	5	NA	3301621	rs3884534	5	3301209	G	A	0.484095	0.00267	0.000758575	0.000432	-0.265746	0.0328607	6.11e-16	-0.0100472	0.00311316	0.00125	0.00962	0.239	7
BRCA	cg26038465	22	NA	38610514	rs5756932	22	38546118	T	C	0.365805	-0.00239081	0.000792705	0.00256	-0.282636	0.0347292	4.01e-16	0.00845897	0.00299109	0.00468	0.00468	0.239	20
BRCA	cg06627628	2	NA	24431161	rs2303291	2	24431184	T	C	0.259443	-0.00296933	0.000854136	0.000508	-0.704808	0.0341435	1.14e-94	0.00421296	0.00122894	0.000608	0.009	0.239	20
BRCA	cg13670957	19	NA	18329801	rs4458132	19	18336360	T	A	0.363817	-0.00286609	0.000808852	0.000395	-0.559632	0.0321956	1.12e-67	0.00512138	0.00147505	0.000517	0.000961	0.238	20
BRCA	cg13225565	14	NA	93106414	rs734206	14	93108464	C	T	0.301193	-0.00298643	0.000828374	0.000312	-1.20816	0.0264571	0	0.00247188	0.000687783	0.000326	0.00325	0.238	20
BRCA	cg10808810	19	NA	18429665	rs76378167	19	18433714	A	G	0.082505	-0.00115271	0.00158576	0.467	1.604	0.0644394	9.17e-137	-0.000718647	0.00098905	0.467	0.0061	0.237	18
BRCA	cg06834313	12	NA	108851556	rs12427082	12	108849271	G	A	0.180915	0.00166832	0.00110108	0.13	-0.880059	0.045749	1.82e-82	-0.00189569	0.00125502	0.131	0.00958	0.237	20
BRCA	cg10237419	4	NA	110224235	rs10013655	4	110237105	G	T	0.489066	-0.00241474	0.000761967	0.00153	-0.263532	0.0325267	5.41e-16	0.00916299	0.00310468	0.00316	0.00316	0.237	11
BRCA	cg25132241	14	NA	92396859	rs2498827	14	92376372	G	A	0.430417	-0.00107699	0.000764422	0.159	0.193399	0.0334265	7.22e-09	-0.00556875	0.00406806	0.171	0.00966	0.236	16
BRCA	cg19985056	5	NA	56595244	rs13176773	5	56594919	T	G	0.0735586	0.000638935	0.00137134	0.641	1.94992	0.0477519	0	0.000327672	0.000703326	0.641	0.000238	0.236	20
BRCA	cg03249590	12	NA	57040199	rs146900373	12	57063046	A	G	0.0109344	0.0120979	0.0030535	7.43e-05	5.35797	0.0906824	0	0.00225793	0.000571178	7.71e-05	0.000947	0.235	14
BRCA	cg03610228	10	NA	21799395	rs11012730	10	21811487	A	G	0.375746	0.00465138	0.000795183	4.93e-09	0.296004	0.0346241	1.24e-17	0.0157139	0.00325503	1.38e-06	1.38e-06	0.235	20
BRCA	cg13293729	6	NA	28911902	rs142403264	6	29245760	C	T	0.511928	-0.00240976	0.00075554	0.00143	0.579288	0.0310403	1e-77	-0.00415987	0.00132317	0.00167	0.00352	0.235	20
BRCA	cg08525145	1	NA	155911361	rs7521292	1	155941685	T	A	0.279324	0.00250093	0.000854502	0.00343	-0.279688	0.0340371	2.08e-16	-0.00894186	0.00324321	0.00583	0.00583	0.234	20
BRCA	cg24496847	20	NA	31045114	rs6141285	20	30892434	G	A	0.349901	0.00163044	0.000780846	0.0368	0.443127	0.0322056	4.48e-43	0.0036794	0.0017823	0.039	0.00536	0.233	20
BRCA	cg14278614	1	NA	7740806	rs34535455	1	7740810	A	G	0.158052	-0.00288961	0.00102418	0.00478	-0.768288	0.0419402	5.88e-75	0.0037611	0.00134879	0.0053	0.00746	0.233	20
BRCA	cg20047329	11	NA	788688	rs10902207	11	726814	G	C	0.214712	-0.00141911	0.000900487	0.115	0.274578	0.0382341	6.89e-13	-0.00516833	0.00335757	0.124	0.00187	0.231	20
BRCA	cg21318380	20	NA	49620366	rs6020918	20	49639463	T	C	0.419483	0.00300027	0.000773539	0.000105	0.277628	0.0317445	2.22e-18	0.0108068	0.00304795	0.000392	0.000392	0.231	13
BRCA	cg05650055	11	NA	69063136	rs7103126	11	69063393	C	T	0.168986	2.01e-05	0.00101991	0.984	-0.839361	0.0397233	4.2e-99	-2.39e-05	0.0012151	0.984	0.00706	0.23	20
BRCA	cg01505556	6	NA	30174125	rs144447022	6	29244219	T	G	0.0695825	-0.000889568	0.00117313	0.448	-0.537234	0.0501355	8.6e-27	0.00165583	0.00218911	0.449	0.00645	0.23	20
BRCA	cg09243576	3	NA	46850588	rs72899433	3	46789269	C	G	0.0258449	-0.00792015	0.00225604	0.000447	1.14937	0.0995829	8.12e-31	-0.00689086	0.00205164	0.000783	0.000656	0.229	20
BRCA	cg18878992	17	NA	43974344	rs112155389	17	43758078	A	G	0.239563	-0.0035945	0.000904204	7.03e-05	0.783971	0.0364289	9.99e-103	-0.00458499	0.00117288	9.26e-05	0.00201	0.229	20
BRCA	cg19142181	20	NA	61591066	rs2427462	20	61591049	T	C	0.492048	0.00193694	0.000761115	0.0109	-0.934377	0.0275002	4.86e-253	-0.00207297	0.000816851	0.0112	0.00219	0.228	20
BRCA	cg05468064	22	NA	46423449	rs4072455	22	46422938	C	T	0.303181	0.00176423	0.000815963	0.0306	0.669679	0.0325601	5.37e-94	0.00263444	0.00122515	0.0315	0.00881	0.228	20
BRCA	cg08312152	14	NA	92418138	rs1040617	14	92432308	G	A	0.39662	0.00218345	0.000762302	0.00418	-0.247089	0.0323514	2.21e-14	-0.00883669	0.00329494	0.00732	0.00732	0.227	10
BRCA	cg08596817	11	NA	320929	rs6598042	11	324635	A	G	0.419483	0.00277481	0.000762301	0.000273	0.507518	0.0319828	1.05e-56	0.00546741	0.00154103	0.000388	0.004	0.227	11
BRCA	cg22524980	12	NA	115893200	rs1634142	12	115720102	C	T	0.389662	0.00284596	0.000782266	0.000275	-0.240671	0.0344876	2.98e-12	-0.0118251	0.00366554	0.00126	0.00017	0.226	20
BRCA	cg08500872	16	NA	87990909	rs28427460	16	88082568	C	G	0.450298	-0.00230188	0.000764494	0.0026	0.210162	0.0325605	1.09e-10	-0.0109529	0.00401398	0.00636	0.00636	0.226	18
BRCA	cg21620969	11	NA	802895	rs7479101	11	802115	A	G	0.377734	-0.00229807	0.000809115	0.00451	-0.217813	0.0346504	3.26e-10	0.0105507	0.00407631	0.00965	0.00965	0.226	5
BRCA	cg03888645	22	NA	41183474	rs138305	22	41193574	G	A	0.346918	0.00312748	0.000799898	9.24e-05	-0.286111	0.034618	1.4e-16	-0.010931	0.00309282	0.000409	0.000409	0.226	20
BRCA	cg17895511	13	NA	113819409	rs2476326	13	113828412	C	T	0.203777	-0.00257261	0.000952136	0.00689	-0.53832	0.0409543	1.83e-39	0.00477896	0.0018057	0.00813	0.00813	0.225	17
BRCA	cg10685359	4	NA	87814065	rs10021790	4	87772240	C	T	0.349901	0.00159726	0.000785762	0.0421	-0.872203	0.029122	4.4e-197	-0.00183129	0.000902966	0.0426	0.00605	0.225	20
BRCA	cg13694664	9	NA	117039406	rs10513241	9	117037820	G	A	0.373757	8.29e-05	0.000787906	0.916	0.298244	0.0330534	1.83e-19	0.000277906	0.002642	0.916	0.00642	0.224	20
BRCA	cg12038298	11	NA	1951814	rs540710	11	1947575	A	C	0.37674	-0.00362218	0.000792759	4.9e-06	-0.179904	0.033859	1.08e-07	0.020134	0.00581179	0.000532	0.000532	0.223	14
BRCA	cg18636739	12	NA	10870175	rs7304148	12	10870231	C	T	0.265408	-0.00277389	0.000852162	0.00113	-0.366427	0.0355423	6.38e-25	0.0075701	0.00243876	0.00191	0.000635	0.223	12
BRCA	cg27406070	6	NA	29575566	rs149851804	6	29622760	A	G	0.054672	0.00224637	0.00159222	0.158	-1.69169	0.0584303	2.63e-184	-0.00132789	0.000942318	0.159	0.00143	0.223	18
BRCA	cg06316104	6	NA	29796985	rs147376303	6	29752020	C	T	0.290258	0.000304092	0.000802312	0.705	-0.835656	0.0305372	7.12e-165	-0.000363896	0.000960191	0.705	0.000917	0.223	20
BRCA	cg27028750	5	NA	1349422	rs31489	5	1342714	A	C	0.408549	0.00171848	0.00076827	0.0253	-0.664719	0.031735	2.04e-97	-0.00258527	0.00116235	0.0261	0.00747	0.221	20
BRCA	cg10429091	6	NA	28861423	rs3129102	6	29205336	T	C	0.166998	0.00376219	0.00106147	0.000394	-0.279345	0.0446456	3.93e-10	-0.0134679	0.00436715	0.00204	0.00393	0.221	11
BRCA	cg06290221	3	NA	182075561	rs2607947	3	182233472	C	T	0.0675944	0.00403957	0.00145412	0.00547	-0.649058	0.0610011	1.94e-26	-0.00622374	0.00231546	0.00719	0.00719	0.219	5
BRCA	cg12732162	10	NA	123413924	rs4752575	10	123407187	A	G	0.114314	0.010196	0.00118985	1.04e-17	0.303069	0.0537607	1.73e-08	0.0336425	0.00714337	2.48e-06	2.48e-06	0.218	4
BRCA	cg13732302	17	NA	44222207	rs150592114	17	44333331	G	A	0.239563	-0.0035068	0.000931827	0.000168	-0.267766	0.0384667	3.38e-12	0.0130965	0.00395603	0.000931	0.000931	0.218	20
BRCA	cg00433866	6	NA	29623646	rs2747429	6	29648377	C	T	0.188867	-0.00067791	0.000877778	0.44	0.543096	0.0370298	1.06e-48	-0.00124823	0.00161849	0.441	0.00673	0.217	20
BRCA	cg21214508	17	NA	44248233	rs199525	17	44847834	G	T	0.220676	-0.003071	0.000920363	0.000848	-0.339021	0.0403303	4.24e-17	0.00905844	0.00292082	0.00193	0.00771	0.217	20
BRCA	cg15049101	10	NA	123353889	rs1896422	10	123210812	G	A	0.481113	-0.000942023	0.000756792	0.213	0.516908	0.0317156	1.02e-59	-0.00182242	0.00146834	0.215	1.9e-11	0.215	20
BRCA	cg08523029	5	NA	130500466	rs7734432	5	130505171	T	G	0.220676	-0.00194477	0.000928449	0.0362	-0.932242	0.0380145	8.33e-133	0.00208612	0.000999558	0.0369	0.00723	0.215	20
BRCA	cg25840354	4	NA	38784158	rs7663239	4	38785850	G	T	0.0656064	0.00140008	0.00179932	0.437	1.73869	0.0945143	1.41e-75	0.00080525	0.0010358	0.437	0.00609	0.215	20
BRCA	cg04459447	8	NA	135487401	rs67816129	8	135496810	T	A	0.199801	0.0012557	0.000906996	0.166	-1.45225	0.0223677	0	-0.000864658	0.000624687	0.166	0.00989	0.214	20
BRCA	cg09092093	5	NA	58335954	rs72770683	5	58339046	G	A	0.336978	-0.00284927	0.000815663	0.000477	0.277987	0.0349764	1.9e-15	-0.0102497	0.00320507	0.00138	0.00138	0.213	12
BRCA	cg05143842	17	NA	77904236	rs3743	17	77909626	A	G	0.305169	-0.00199152	0.000817852	0.0149	0.420744	0.0341415	6.77e-35	-0.00473333	0.00198141	0.0169	0.00761	0.213	18
BRCA	cg17188567	12	NA	81649347	rs11114746	12	81467827	G	A	0.313121	-0.00259392	0.000830101	0.00178	0.194148	0.0353125	3.84e-08	-0.0133605	0.00491794	0.00659	0.00659	0.213	9
BRCA	cg13016775	3	NA	100053096	rs35945684	3	100059666	C	T	0.347913	-0.00303443	0.000802201	0.000155	-0.470324	0.0324382	1.23e-47	0.00645179	0.00176272	0.000252	1.23e-05	0.211	20
BRCA	cg11604379	6	NA	29945039	rs183708053	6	29931418	T	C	0.0357853	0.00574054	0.00194569	0.00317	0.862822	0.0800291	4.22e-27	0.00665321	0.00233794	0.00443	0.0035	0.21	17
BRCA	cg07380021	1	NA	206755252	rs4845111	1	206751308	C	T	0.235586	0.00264407	0.000880568	0.00268	0.29487	0.0374424	3.4e-15	0.0089669	0.00319599	0.00502	0.00502	0.21	7
BRCA	cg09524658	3	NA	129272656	rs2170774	3	129279570	C	T	0.140159	-0.00319105	0.00112515	0.00457	-0.49147	0.0476871	6.61e-25	0.00649287	0.00237446	0.00625	0.00625	0.21	20
BRCA	cg05800416	8	NA	19460097	rs34267078	8	19476502	T	C	0.0735586	0.00433577	0.00132543	0.00107	0.803264	0.0537405	1.63e-50	0.00539769	0.00168911	0.0014	0.00151	0.21	20
BRCA	cg04742282	6	NA	28911873	rs142403264	6	29245760	C	T	0.511928	-0.00240976	0.00075554	0.00143	0.629411	0.0306767	1.5e-93	-0.0038286	0.00121481	0.00162	0.0069	0.208	20
BRCA	cg04066265	8	NA	19460243	rs7003381	8	19457965	G	A	0.0745527	0.00419651	0.00129821	0.00123	0.709282	0.0536723	7.18e-40	0.00591656	0.00188428	0.00169	0.00268	0.208	20
BRCA	cg14597862	5	NA	1300309	rs2736105	5	1299756	T	C	0.475149	0.00203581	0.000761019	0.00747	-0.199493	0.0324614	7.97e-10	-0.0102049	0.00416051	0.0142	0.00481	0.208	6
BRCA	cg04730047	3	NA	99979355	rs68094410	3	100008618	A	G	0.272366	-0.00264238	0.000879766	0.00267	0.239812	0.0380085	2.8e-10	-0.0110185	0.00406302	0.00669	0.00669	0.208	3
BRCA	cg10504390	18	NA	12947632	rs3976787	18	12971894	T	C	0.409543	0.00164627	0.0007737	0.0334	-0.443482	0.031906	6.37e-44	-0.00371215	0.00176493	0.0354	0.00177	0.208	20
BRCA	cg23659289	17	NA	43472725	rs112454267	17	44005329	A	G	0.240557	-0.00361803	0.000903831	6.25e-05	0.369741	0.039436	6.87e-21	-0.00978531	0.00265798	0.000232	0.00189	0.207	12
BRCA	cg20935165	2	NA	172972840	rs2016394	2	172972971	A	G	0.45825	-0.00273428	0.000758179	0.000311	0.362784	0.0318233	4.18e-30	-0.00753694	0.00219197	0.000585	0.00594	0.207	11
BRCA	cg17782000	19	NA	18303124	rs8109807	19	18308508	T	C	0.370775	-0.00245265	0.000805002	0.00231	-0.586697	0.0337229	8.61e-68	0.00418044	0.00139297	0.00269	0.00488	0.206	20
BRCA	cg09959112	16	NA	10973301	rs11074933	16	10976566	A	G	0.228628	-0.00230364	0.000881866	0.009	0.36718	0.0371856	5.38e-23	-0.00627387	0.00248435	0.0116	0.00127	0.206	20
BRCA	cg22999525	2	NA	24300821	rs10184713	2	24285088	A	G	0.139165	-0.00155548	0.00108306	0.151	-0.394577	0.04503	1.91e-18	0.00394215	0.00278149	0.156	0.00678	0.205	20
BRCA	cg12033273	1	NA	155247785	rs61092432	1	155222729	C	T	0.270378	0.00331839	0.000876574	0.000153	0.246658	0.0368615	2.21e-11	0.0134534	0.00408311	0.000985	0.00216	0.205	20
BRCA	cg15697902	19	NA	14676213	rs34574327	19	14710128	A	G	0.345924	-0.00271988	0.00080159	0.000691	0.22169	0.0332077	2.46e-11	-0.0122688	0.00405606	0.00249	0.00132	0.204	4
BRCA	cg13791131	11	NA	2161892	rs3741212	11	2161858	A	G	0.319085	-0.00152823	0.000811431	0.0596	0.259894	0.0336853	1.21e-14	-0.0058802	0.00321384	0.0673	0.00424	0.204	16
BRCA	cg12034943	19	NA	18811790	rs2003476	19	18806668	C	T	0.422465	-0.0025755	0.000773332	0.000867	-0.311052	0.0321374	3.71e-22	0.00827997	0.00262925	0.00164	0.00375	0.204	20
BRCA	cg23558213	22	NA	41215939	rs11703643	22	41224393	C	G	0.478131	-0.00240517	0.000757102	0.00149	-0.246035	0.033003	8.99e-14	0.00977572	0.00334496	0.00347	0.00558	0.204	20
BRCA	cg00891649	17	NA	43972573	rs112003140	17	43980998	A	G	0.239563	-0.00360577	0.000903949	6.64e-05	-0.722577	0.0377015	7.15e-82	0.00499015	0.00127781	9.41e-05	0.00616	0.204	20
BRCA	cg09336589	17	NA	7107939	rs929229	17	7105399	A	G	0.357853	-0.0015116	0.000787128	0.0548	-0.693195	0.0317354	9.06e-106	0.00218063	0.00113989	0.0557	0.00686	0.203	20
BRCA	cg04517722	19	NA	17905589	rs10854161	19	17905619	G	A	0.277336	-0.000226995	0.000847218	0.789	1.02139	0.0324573	2.33e-217	-0.000222241	0.000829506	0.789	0.00495	0.203	20
BRCA	cg16744531	19	NA	17905626	rs10854161	19	17905619	G	A	0.277336	-0.000226995	0.000847218	0.789	1.10184	0.031018	2.2e-276	-0.000206014	0.000768934	0.789	0.00949	0.202	20
BRCA	cg20667480	17	NA	77916768	rs894872	17	77910974	G	T	0.305169	-0.00203423	0.000818963	0.013	-0.575639	0.0334387	2.06e-66	0.00353386	0.00143744	0.014	0.00466	0.202	20
BRCA	cg18770763	11	NA	724525	rs7936322	11	745884	C	T	0.550696	-0.00239843	0.000758103	0.00156	-0.236567	0.0320445	1.55e-13	0.0101385	0.00348647	0.00364	0.00614	0.201	20
BRCA	cg22608507	12	NA	123379308	rs12369710	12	123298742	T	C	0.0904573	-0.00544042	0.00148876	0.000258	-0.405047	0.0644803	3.35e-10	0.0134316	0.00425222	0.00158	0.00158	0.2	14
BRCA	cg11255208	17	NA	42275334	rs2521602	17	42336424	A	G	0.0188867	0.00778326	0.00256575	0.00242	0.687251	0.105959	8.81e-11	0.0113252	0.0041215	0.006	0.006	0.2	6
BRCA	cg06498964	11	NA	1981264	rs217236	11	1981259	C	T	0.423459	-0.00261469	0.00077367	0.000726	0.83329	0.0303595	7.46e-166	-0.00313779	0.000935464	0.000796	1.68e-05	0.2	20
BRCA	cg14159342	1	NA	3624292	rs1122723	1	3594105	G	A	0.416501	-0.00233117	0.00076324	0.00226	-0.313247	0.0325579	6.5e-22	0.00744195	0.00255637	0.0036	0.00442	0.199	6
BRCA	cg09406989	16	NA	68772469	rs12923775	16	68756450	C	T	0.425447	-0.00226231	0.000768812	0.00325	0.62204	0.0320858	9.98e-84	-0.00363692	0.00125011	0.00362	0.00992	0.199	20
BRCA	cg01741372	11	NA	783889	rs7104929	11	784340	G	C	0.445328	0.0024812	0.000759327	0.00108	1.18339	0.0196564	0	0.00209669	0.000642598	0.0011	0.00121	0.199	20
BRCA	cg01879723	3	NA	141119262	rs34169305	3	141071293	T	C	0.307157	0.00282045	0.000809552	0.000494	-0.206533	0.0353223	5e-09	-0.0136562	0.00456279	0.00276	0.00276	0.198	10
BRCA	cg16520312	17	NA	43971471	rs113790915	17	43810782	C	G	0.239563	-0.00358771	0.000904241	7.26e-05	-0.593264	0.038115	1.26e-54	0.00604741	0.00157292	0.000121	0.000322	0.198	20
BRCA	cg19823683	11	NA	69500973	rs1192923	11	69504277	T	A	0.352883	-0.00255264	0.000784132	0.00113	0.205628	0.0332791	6.46e-10	-0.0124139	0.00431023	0.00398	0.00398	0.198	4
BRCA	cg24801230	17	NA	43978533	rs111751251	17	44042951	T	C	0.238569	-0.00363628	0.000919896	7.72e-05	-1.59366	0.0181566	0	0.00228172	0.000577807	7.85e-05	0.00465	0.196	20
BRCA	cg14247180	22	NA	38513725	rs4821747	22	38538856	C	T	0.362823	-0.00249222	0.00078931	0.00159	-0.730548	0.0316973	1.55e-117	0.00341144	0.00109053	0.00176	0.000396	0.196	20
BRCA	cg11386080	6	NA	56112392	rs7757985	6	56108509	A	G	0.379722	-0.00160735	0.000784663	0.0405	-0.281298	0.0336783	6.68e-17	0.00571405	0.0028721	0.0466	0.00725	0.195	20
BRCA	cg05501285	5	NA	131563764	rs10479000	5	131607402	C	T	0.423459	0.00376603	0.000758897	6.96e-07	-0.211152	0.0308957	8.24e-12	-0.0178356	0.00444162	5.93e-05	5.93e-05	0.195	20
BRCA	cg11073024	6	NA	28891819	rs142403264	6	29245760	C	T	0.511928	-0.00240976	0.00075554	0.00143	0.215034	0.0323299	2.91e-11	-0.0112064	0.00389667	0.00403	0.00659	0.195	20
BRCA	cg12604352	17	NA	44073915	rs112310745	17	44082432	A	G	0.240557	-0.00357392	0.000909524	8.51e-05	-0.333165	0.0394187	2.86e-17	0.0107272	0.00301056	0.000366	0.000366	0.194	18
BRCA	cg02895948	1	NA	208204062	rs3811386	1	208204399	G	T	0.402584	-0.00190679	0.000764138	0.0126	0.573432	0.0304275	3.18e-79	-0.00332522	0.0013442	0.0134	0.00353	0.194	20
BRCA	cg25664054	17	NA	36813786	rs7215949	17	36823139	T	C	0.240557	-0.00295089	0.000879706	0.000795	-0.28072	0.0387254	4.2e-13	0.0105119	0.003453	0.00233	0.00998	0.194	9
BRCA	cg01837375	19	NA	13031108	rs2967890	19	13040647	G	A	0.212724	0.00207308	0.000885333	0.0192	-0.328034	0.039068	4.6e-17	-0.00631971	0.00280189	0.0241	0.00616	0.192	13
BRCA	cg07148458	17	NA	7254301	rs3809823	17	7234299	G	C	0.212724	-0.00322659	0.000880317	0.000247	-1.17802	0.0267656	0	0.00273899	0.000749872	0.00026	0.00291	0.192	20
BRCA	cg07907506	3	NA	100210582	rs6763178	3	100220049	A	G	0.16501	0.00253802	0.00101787	0.0127	-1.07265	0.0430264	3.52e-137	-0.00236612	0.000953665	0.0131	0.000103	0.191	20
BRCA	cg24805360	5	NA	77930038	rs9293757	5	77924020	T	C	0.371769	-0.00267257	0.000801815	0.000859	-1.2999	0.0201244	0	0.00205598	0.000617649	0.000872	0.000163	0.189	20
BRCA	cg00395296	22	NA	42481778	rs5758574	22	42481400	G	C	0.463221	-0.00228977	0.000758365	0.00253	0.291366	0.0325437	3.46e-19	-0.00785874	0.00274682	0.00422	0.00459	0.189	20
BRCA	cg03611487	11	NA	19737237	rs2278132	11	19735987	G	A	0.494036	-0.00134247	0.000756734	0.0761	-0.364153	0.0324686	3.42e-29	0.00368655	0.0021039	0.0797	0.00597	0.187	18
BRCA	cg24766041	19	NA	17375445	rs9749201	19	17372922	A	G	0.220676	-0.00215918	0.000926964	0.0198	0.236257	0.0389987	1.38e-09	-0.00913912	0.00420357	0.0297	0.00133	0.186	9
BRCA	cg02613624	11	NA	2154386	rs11042735	11	2147076	A	G	0.0984095	0.00332833	0.00135505	0.014	0.534601	0.0628424	1.78e-17	0.00622582	0.00263823	0.0183	0.00963	0.185	13
BRCA	cg17319956	12	NA	115671392	rs12426128	12	115672148	G	A	0.256461	0.00110583	0.000879406	0.209	-0.532892	0.0366547	6.94e-48	-0.00207515	0.00165641	0.21	0.00306	0.185	20
BRCA	cg01355876	5	NA	131281439	rs4493667	5	131247218	T	G	0.213718	-0.00185616	0.000957932	0.0527	-0.474344	0.0410409	6.74e-31	0.00391311	0.00204767	0.056	0.00243	0.185	20
BRCA	cg14956327	6	NA	110737053	rs9374176	6	110737247	T	C	0.40159	-0.00159629	0.0007679	0.0376	-0.661264	0.0310862	2.06e-100	0.002414	0.00116679	0.0386	0.00742	0.184	20
BRCA	cg21960279	19	NA	17905606	rs10854161	19	17905619	G	A	0.277336	-0.000226995	0.000847218	0.789	0.980607	0.0331453	2.32e-192	-0.000231484	0.000864008	0.789	0.00717	0.184	20
BRCA	cg12710480	20	NA	32254216	rs3746461	20	32245869	G	C	0.488072	0.00130537	0.000759463	0.0856	-0.642921	0.0310136	1.85e-95	-0.00203037	0.00118532	0.0867	0.00412	0.184	20
BRCA	cg13634681	15	NA	63050577	rs140718507	15	63065471	G	C	0.228628	0.00249704	0.000870769	0.00414	0.258778	0.0377568	7.19e-12	0.00964935	0.00364758	0.00816	0.00816	0.183	14
BRCA	cg17736285	17	NA	44347643	rs9912530	17	44836302	T	C	0.300199	-0.00260307	0.00084743	0.00213	-0.273446	0.0360705	3.43e-14	0.0095195	0.00334382	0.00441	0.00441	0.181	20
BRCA	cg08403419	1	NA	155911238	rs6670493	1	155956903	C	G	0.249503	0.00239265	0.000858304	0.00531	-0.265249	0.0367852	5.56e-13	-0.00902039	0.00346923	0.00932	0.00932	0.181	20
BRCA	cg06032337	6	NA	29648468	rs385492	6	29649547	T	C	0.489066	-0.00103546	0.000757984	0.172	1.27106	0.0158653	0	-0.000814643	0.000596427	0.172	0.0067	0.18	20
BRCA	cg26209169	5	NA	1316264	rs402710	5	1320722	T	C	0.332008	0.00253405	0.00079356	0.00141	0.635519	0.0326346	1.83e-84	0.00398737	0.00126536	0.00163	0.00803	0.18	20
BRCA	cg02340083	1	NA	50882006	rs2653901	1	50877526	T	A	0.469185	0.00220986	0.00075709	0.00351	-0.207659	0.0314232	3.88e-11	-0.0106418	0.00398563	0.00758	0.00758	0.18	9
BRCA	cg12835048	10	NA	123357606	rs7091556	10	123208157	A	C	0.508946	0.000881788	0.000758071	0.245	0.285472	0.0320286	4.97e-19	0.00308888	0.00267802	0.249	0.000385	0.18	17
BRCA	cg24360617	22	NA	39353495	rs17370615	22	39350222	A	G	0.287276	-0.00283441	0.000843036	0.000773	0.203391	0.0357809	1.31e-08	-0.0139358	0.00481566	0.00381	0.00381	0.179	3
BRCA	cg12698607	22	NA	17660636	rs8139115	22	17658776	A	C	0.252485	0.00279597	0.000845575	0.000944	0.480141	0.035513	1.19e-41	0.00582323	0.001813	0.00132	0.00969	0.179	20
BRCA	cg16024904	19	NA	17905718	rs10854161	19	17905619	G	A	0.277336	-0.000226995	0.000847218	0.789	0.70567	0.0363533	6.18e-84	-0.000321673	0.0012007	0.789	0.00817	0.179	20
BRCA	cg03785828	5	NA	81573306	rs226205	5	81593654	C	T	0.234592	-0.0029166	0.000877995	0.000894	-0.596438	0.0370865	3.39e-58	0.00489003	0.00150314	0.00114	0.00908	0.178	20
BRCA	cg04714110	10	NA	21799143	rs11012730	10	21811487	A	G	0.375746	0.00465138	0.000795183	4.93e-09	0.269565	0.034516	5.72e-15	0.0172551	0.00368554	2.84e-06	1.22e-05	0.178	20
BRCA	cg22286936	6	NA	50683593	rs76300509	6	50683619	C	G	0.0377734	0.00819863	0.00187968	1.29e-05	0.613813	0.0689267	5.32e-19	0.0133569	0.00340989	8.96e-05	0.000444	0.178	20
BRCA	cg17503389	5	NA	90575422	rs4019302	5	90578758	G	C	0.11829	-0.00162425	0.00118355	0.17	0.794403	0.0481897	4.71e-61	-0.00204462	0.00149501	0.171	0.00575	0.177	20
BRCA	cg03759229	6	NA	28601417	rs149963	6	28017132	A	G	0.369781	0.00176119	0.000776173	0.0233	0.22409	0.0341761	5.49e-11	0.0078593	0.0036652	0.032	0.00388	0.177	20
BRCA	cg11624060	5	NA	1316038	rs381949	5	1322468	A	G	0.405567	0.00172456	0.000767052	0.0246	0.561694	0.0320352	7.93e-69	0.00307028	0.00137679	0.0257	0.00204	0.176	20
BRCA	cg13803915	1	NA	10490063	rs524150	1	10492940	G	C	0.493042	-0.00223097	0.000757227	0.00322	-0.431513	0.0322874	9.72e-41	0.00517011	0.00179695	0.00401	0.00594	0.176	20
BRCA	cg19697537	19	NA	18337358	rs62120394	19	18338709	A	G	0.289264	0.00297255	0.00083559	0.000375	0.474182	0.0355331	1.27e-40	0.0062688	0.00182371	0.000587	0.00399	0.175	20
BRCA	cg07639520	12	NA	116354949	rs11067836	12	116354673	C	T	0.420477	-0.00276495	0.000771714	0.00034	0.355746	0.0321598	1.92e-28	-0.00777226	0.00228023	0.000653	0.00284	0.174	20
BRCA	cg01059385	22	NA	42394853	rs4822081	22	42406788	T	C	0.279324	0.00128064	0.000826505	0.121	0.481565	0.034673	7.41e-44	0.00265933	0.00172694	0.124	0.00648	0.174	20
BRCA	cg18228076	17	NA	43983362	rs111751251	17	44042951	T	C	0.238569	-0.00363628	0.000919896	7.72e-05	-1.48391	0.0233966	0	0.00245047	0.000621116	7.97e-05	0.00444	0.172	20
BRCA	cg08339189	9	NA	124260498	rs7039932	9	124292328	T	G	0.2833	0.00287703	0.000816205	0.000424	0.234699	0.0340788	5.7e-12	0.0122584	0.00390671	0.0017	0.0017	0.172	15
BRCA	cg24425727	6	NA	36645648	rs2395655	6	36645696	G	A	0.379722	0.0029055	0.000778623	0.00019	-0.921574	0.0286891	2.12e-226	-0.00315276	0.000850565	0.00021	0.0063	0.172	20
BRCA	cg24697433	6	NA	28876508	rs3129102	6	29205336	T	C	0.166998	0.00376219	0.00106147	0.000394	-1.39135	0.0327495	0	-0.00270399	0.000765557	0.000412	1.77e-05	0.172	20
BRCA	cg04074321	10	NA	88296423	rs11815998	10	88302428	T	C	0.0775348	-0.00424913	0.00144215	0.00322	0.345346	0.056482	9.7e-10	-0.012304	0.00463553	0.00795	0.00795	0.171	12
BRCA	cg23690528	7	NA	94285270	rs1878588	7	94264048	A	G	0.287276	0.00252928	0.000828167	0.00226	0.191312	0.0349375	4.35e-08	0.0132207	0.00495665	0.00765	0.00765	0.17	6
BRCA	cg05775862	10	NA	31026101	rs10740832	10	31025975	A	C	0.0884692	-0.00473339	0.00140493	0.000754	2.12333	0.047164	0	-0.00222923	0.000663514	0.00078	0.0012	0.17	20
BRCA	cg22863889	1	NA	155910967	rs12407800	1	155760742	C	A	0.290258	0.00285523	0.000832891	0.000608	-0.291657	0.0348018	5.27e-17	-0.00978968	0.0030854	0.00151	0.00151	0.17	20
BRCA	cg05727186	17	NA	43697356	rs62056789	17	43975415	C	A	0.239563	-0.00361272	0.000903837	6.41e-05	-0.495264	0.0392465	1.65e-36	0.00729453	0.00191432	0.000139	0.00725	0.17	17
BRCA	cg14298020	6	NA	29712462	rs113795410	6	29728209	C	A	0.196819	-0.00187562	0.000980099	0.0557	-0.626702	0.0406263	1.09e-53	0.00299284	0.00157589	0.0575	0.00663	0.17	20
BRCA	cg08431931	22	NA	42394659	rs28715885	22	42441091	G	T	0.187873	0.00109312	0.000936405	0.243	0.532413	0.0403057	7.75e-40	0.00205314	0.00176565	0.245	0.00281	0.169	20
BRCA	cg11322849	11	NA	2182783	rs11602347	11	2176852	G	C	0.389662	-0.00208823	0.000779985	0.00742	0.339686	0.0325374	1.63e-25	-0.00614753	0.0023705	0.0095	0.00447	0.169	20
BRCA	cg02824029	6	NA	29570008	rs445150	6	29646879	C	T	0.262425	-9.87e-05	0.000804808	0.902	0.319998	0.0339325	4.08e-21	-0.000308449	0.00251525	0.902	0.0054	0.169	20
BRCA	cg01485797	11	NA	810820	rs6597979	11	815323	G	T	0.50497	-0.00321793	0.000759348	2.26e-05	-0.209723	0.0320001	5.61e-11	0.0153437	0.0043117	0.000373	0.000373	0.169	19
BRCA	cg23202291	11	NA	1979235	rs2063550	11	1979223	G	C	0.479125	-0.00221283	0.000762004	0.00368	-0.485832	0.0322294	2.4e-51	0.00455472	0.00159729	0.00435	0.000497	0.169	20
BRCA	cg01882395	17	NA	43717810	rs113790915	17	43810782	C	G	0.239563	-0.00358771	0.000904241	7.26e-05	0.570791	0.0384599	7.93e-50	-0.00628551	0.00163982	0.000127	0.00532	0.169	20
BRCA	cg23477460	3	NA	66848765	rs4856960	3	66843301	C	T	0.17992	0.00115705	0.000968281	0.232	1.2955	0.032919	0	0.00089313	0.000747763	0.232	0.000294	0.169	20
BRCA	cg10913846	14	NA	37133714	rs7149262	14	37136545	A	C	0.215706	-0.00423737	0.000932493	5.52e-06	0.363251	0.0389693	1.15e-20	-0.0116651	0.00285586	4.41e-05	6.96e-05	0.168	20
BRCA	cg25900902	17	NA	7253340	rs9899849	17	7234983	A	G	0.210736	-0.00322514	0.00087969	0.000246	-1.07882	0.0291624	1.46e-299	0.00298951	0.000819413	0.000264	0.00429	0.168	20
BRCA	cg02228913	17	NA	44058016	rs112572874	17	44072984	G	A	0.240557	-0.00367814	0.000902422	4.58e-05	-1.38556	0.0267803	0	0.00265462	0.000653323	4.84e-05	0.00325	0.167	20
BRCA	cg05159804	17	NA	44343776	rs2668668	17	44284641	G	T	0.241551	-0.003536	0.000906	9.51e-05	-1.1109	0.0335442	1.66e-240	0.003183	0.000821199	0.000106	0.00112	0.167	20
BRCA	cg05702280	9	NA	34988294	rs138294209	9	34988605	C	G	0.0427435	9.02e-05	0.00185802	0.961	-1.55399	0.0731002	2.76e-100	-5.8e-05	0.00119565	0.961	0.00403	0.167	20
BRCA	cg23390684	15	NA	32197095	rs73382685	15	32197351	A	G	0.0675944	0.00221992	0.00155903	0.154	-1.87025	0.0474871	0	-0.00118696	0.000834139	0.155	0.00942	0.166	11
BRCA	cg03817727	2	NA	219861653	rs57040597	2	219997423	G	A	0.0417495	0.00321145	0.00200876	0.11	-0.736911	0.0872305	2.97e-17	-0.00435799	0.0027743	0.116	0.00663	0.166	10
BRCA	cg24671760	6	NA	110678078	rs756487	6	110675112	C	T	0.215706	0.00141865	0.000912373	0.12	0.987628	0.0344402	7.47e-181	0.00143642	0.000925159	0.121	0.0012	0.164	20
BRCA	cg21525176	5	NA	77906752	rs10474561	5	77898383	G	A	0.502982	-0.002704	0.000757286	0.000356	0.336045	0.0316186	2.21e-26	-0.00804654	0.00237731	0.000712	0.00175	0.163	20
BRCA	cg13239976	12	NA	28344166	rs1871152	12	28379826	G	A	0.310139	-0.0033324	0.000813336	4.18e-05	0.211002	0.033652	3.61e-10	-0.0157932	0.00460463	0.000604	0.00331	0.163	20
BRCA	cg24120153	10	NA	122610486	rs10886803	10	122678080	T	C	0.16004	0.00102511	0.000963336	0.287	0.88477	0.0374608	2.48e-123	0.00115862	0.0010899	0.288	0.00333	0.162	20
BRCA	cg25614726	1	NA	10490058	rs524150	1	10492940	G	C	0.493042	-0.00223097	0.000757227	0.00322	-0.494758	0.0313591	4.47e-56	0.00450921	0.00155696	0.00378	0.00507	0.162	20
BRCA	cg20144002	2	NA	3201774	rs7581969	2	3176415	T	C	0.0238569	0.00945103	0.00315785	0.00276	-0.968556	0.128389	4.56e-14	-0.00975786	0.00350758	0.0054	0.0054	0.162	3
BRCA	cg10074506	10	NA	106035131	rs276203	10	106039303	G	A	0.366799	0.00124574	0.000797515	0.118	0.975044	0.0269628	2.36e-286	0.00127762	0.00081869	0.119	0.00621	0.161	20
BRCA	cg06307176	5	NA	131281290	rs56081930	5	131235274	G	T	0.2167	-0.00188696	0.000972635	0.0524	-0.622593	0.0413863	3.81e-51	0.00303081	0.00157517	0.0543	0.000361	0.161	17
BRCA	cg07967207	17	NA	5189032	rs11078556	17	5202196	T	C	0.357853	0.00135408	0.000798429	0.0899	0.4442	0.0343947	3.72e-38	0.00304836	0.00181289	0.0927	0.00519	0.161	20
BRCA	cg01575652	22	NA	38077606	rs2899292	22	38077718	G	A	0.290258	-0.000733088	0.000833185	0.379	0.630794	0.0331724	1.27e-80	-0.00116217	0.00132226	0.379	0.00704	0.161	20
BRCA	cg05698082	6	NA	158239859	rs3763169	6	158241781	T	C	0.250497	0.0030039	0.000889657	0.000734	-0.233803	0.038036	7.9e-10	-0.012848	0.00434143	0.00308	0.00308	0.16	9
BRCA	cg17890778	7	NA	94285288	rs6943782	7	94236874	T	G	0.284294	0.00252781	0.000830358	0.00233	0.256855	0.0349831	2.1e-13	0.00984139	0.00349965	0.00492	0.00492	0.16	18
BRCA	cg20704602	6	NA	29635371	rs3129058	6	29648199	T	C	0.164016	-0.00108074	0.000902379	0.231	0.732445	0.036902	1.14e-87	-0.00147552	0.00123425	0.232	0.00904	0.16	20
BRCA	cg19614157	2	NA	24150126	rs112571034	2	24130916	A	G	0.21173	-0.00177138	0.000965154	0.0665	0.416409	0.0388252	7.75e-27	-0.00425394	0.00235149	0.0704	0.00929	0.159	20
BRCA	cg12163955	15	NA	41217556	rs4924515	15	41214377	C	G	0.474155	0.00142591	0.00075689	0.0596	0.427323	0.0312381	1.35e-42	0.00333684	0.00178795	0.062	0.00386	0.158	20
BRCA	cg18906520	12	NA	123461288	rs36004829	12	123461284	A	G	0.026839	-0.00632953	0.00209529	0.00252	-1.30917	0.0932543	9.03e-45	0.00483477	0.00163711	0.00314	0.000182	0.158	20
BRCA	cg15344234	3	NA	100120961	rs4928125	3	100141714	C	A	0.33499	-0.00318127	0.000813799	9.26e-05	0.502602	0.0338264	6.15e-50	-0.0063296	0.00167427	0.000157	0.000865	0.157	20
BRCA	cg04761751	11	NA	65547889	rs36008241	11	65553306	C	T	0.208748	-0.0025607	0.000922558	0.00551	0.840673	0.0346174	2.85e-130	-0.00304601	0.00110455	0.00582	0.00398	0.157	20
BRCA	cg01934064	17	NA	44064242	rs2668668	17	44284641	G	T	0.241551	-0.003536	0.000906	9.51e-05	0.554709	0.03914	1.36e-45	-0.00637451	0.00169409	0.000168	0.0077	0.155	20
BRCA	cg06817802	5	NA	1291319	rs7712562	5	1296072	A	G	0.156064	0.00326941	0.00108852	0.00267	0.273421	0.0471382	6.62e-09	0.0119574	0.00448319	0.00765	0.00672	0.154	5
BRCA	cg19563932	6	NA	31583915	rs191306205	6	31739684	T	C	0.0308151	0.00238303	0.00237259	0.315	2.09677	0.0845766	1.11e-135	0.00113652	0.00113247	0.316	0.00565	0.154	20
BRCA	cg07487948	5	NA	131566683	rs35719560	5	131584395	C	T	0.104374	-0.000650472	0.00129278	0.615	0.593154	0.0580388	1.61e-24	-0.00109663	0.00218214	0.615	0.00804	0.153	20
BRCA	cg00751072	19	NA	18529121	rs1043327	19	18554972	G	A	0.351889	-0.00358973	0.000790403	5.58e-06	-0.205961	0.0336241	9.05e-10	0.0174292	0.00477742	0.000264	0.000264	0.152	8
BRCA	cg13660174	9	NA	136238392	rs9411397	9	136188214	A	G	0.109344	-0.00129139	0.0011738	0.271	-0.329612	0.0513129	1.33e-10	0.00391791	0.00361301	0.278	0.00832	0.151	14
BRCA	cg15462349	14	NA	37116296	rs76188354	14	37095660	G	A	0.0904573	0.00263837	0.00138898	0.0575	0.521362	0.056213	1.78e-20	0.00506053	0.00271944	0.0628	0.000724	0.151	6
BRCA	cg08715914	12	NA	26278128	rs1466467	12	26330372	G	A	0.139165	0.00308459	0.00106405	0.00374	-0.289531	0.0414812	2.96e-12	-0.0106537	0.00397945	0.00742	0.00742	0.15	17
BRCA	cg07236190	12	NA	96338038	rs35756705	12	96343115	A	G	0.244533	0.00218852	0.00086487	0.0114	-1.20969	0.0259405	0	-0.00180916	0.000716004	0.0115	9.65e-05	0.15	20
BRCA	cg06968155	5	NA	131705112	rs11242109	5	131677047	T	G	0.44334	0.00378904	0.000756575	5.5e-07	0.372312	0.03102	3.45e-33	0.0101771	0.00220191	3.8e-06	0.000217	0.15	20
BRCA	cg18318560	5	NA	131563015	rs12521097	5	131575338	A	G	0.4334	0.00348275	0.00075745	4.27e-06	0.366916	0.030843	1.24e-32	0.00949195	0.0022132	1.8e-05	1.6e-05	0.149	20
BRCA	cg04211581	6	NA	152011656	rs35240111	6	152050523	C	G	0.261431	0.00307147	0.000857399	0.000341	0.314303	0.0370124	2.03e-17	0.00977232	0.00296074	0.000965	0.000513	0.148	20
BRCA	cg05003723	11	NA	1886799	rs113484129	11	1886775	T	C	0.210736	0.00421867	0.000910593	3.61e-06	-0.235177	0.0401948	4.89e-09	-0.0179383	0.00493879	0.000281	0.000281	0.148	5
BRCA	cg22337945	11	NA	86500099	rs11604191	11	86511350	G	C	0.218688	-0.00248309	0.000936513	0.00802	-0.444645	0.040013	1.09e-28	0.00558443	0.00216533	0.00991	0.000192	0.148	20
BRCA	cg07355688	11	NA	129246718	rs1493539	11	129246797	G	C	0.181909	0.00451466	0.000990792	5.2e-06	0.579349	0.0401277	3e-47	0.00779264	0.00179333	1.39e-05	6.52e-05	0.148	20
BRCA	cg01035869	6	NA	31242584	rs28380932	6	31319977	G	A	0.184891	0.00363336	0.00101862	0.000361	-0.939745	0.0365566	9.87e-146	-0.00386633	0.00109432	0.000411	0.00478	0.148	20
BRCA	cg23087153	14	NA	101831067	rs12147227	14	101830215	A	G	0.0725646	0.00171515	0.00146754	0.243	-1.48712	0.0534568	2.55e-170	-0.00115334	0.000987704	0.243	0.00268	0.147	20
BRCA	cg24824472	6	NA	112111043	rs9487736	6	112168309	A	G	0.148111	-0.00397893	0.00110449	0.000315	0.398731	0.0470118	2.22e-17	-0.00997898	0.00300953	0.000914	0.00591	0.147	20
BRCA	cg18113826	6	NA	31583942	rs191306205	6	31739684	T	C	0.0308151	0.00238303	0.00237259	0.315	2.38993	0.0812419	3.28e-190	0.000997113	0.000993323	0.315	0.00546	0.147	20
BRCA	cg03967327	6	NA	24494462	rs4712825	6	24479331	T	C	0.388668	-0.00221982	0.000774158	0.00414	-0.270471	0.0333136	4.7e-16	0.00820724	0.00303552	0.00686	0.00686	0.147	20
BRCA	cg10111716	6	NA	28972110	rs142403264	6	29245760	C	T	0.511928	-0.00240976	0.00075554	0.00143	-0.301173	0.032297	1.11e-20	0.00800125	0.00265134	0.00255	0.00762	0.146	20
BRCA	cg07134666	6	NA	29648400	rs2747429	6	29648377	C	T	0.188867	-0.00067791	0.000877778	0.44	-1.32287	0.0244812	0	0.000512454	0.000663608	0.44	0.0087	0.146	20
BRCA	cg12887581	10	NA	130726406	rs7070942	10	130723132	T	C	0.141153	-0.00306493	0.00104805	0.00345	-0.4714	0.0421287	4.59e-29	0.00650176	0.00229795	0.00466	0.00886	0.145	4
BRCA	cg15708526	6	NA	29648271	rs2535238	6	29645038	A	C	0.188867	-0.000686887	0.000877617	0.434	-1.36033	0.0230531	0	0.000504941	0.000645207	0.434	0.00817	0.144	20
BRCA	cg19603202	22	NA	38431726	rs139901	22	38406147	T	C	0.409543	-0.0024599	0.000764333	0.00129	0.211522	0.0327364	1.04e-10	-0.0116295	0.00403693	0.00397	0.00397	0.144	15
BRCA	cg25733559	12	NA	95397807	rs249181	12	95403521	G	A	0.133201	-0.00260622	0.00103277	0.0116	0.927393	0.040689	5.47e-115	-0.00281026	0.00112043	0.0121	0.00507	0.144	20
BRCA	cg22494932	6	NA	29648379	rs2747429	6	29648377	C	T	0.188867	-0.00067791	0.000877778	0.44	-1.32593	0.024597	0	0.000511271	0.000662077	0.44	0.00907	0.144	20
BRCA	cg21136371	11	NA	1991065	rs83998	11	1998171	G	C	0.341948	-0.000840012	0.000795163	0.291	-0.68686	0.0328237	3.12e-97	0.00122297	0.00115915	0.291	0.00188	0.143	20
BRCA	cg09894383	16	NA	82067445	rs2911423	16	82188801	C	T	0.220676	-0.00200374	0.00089704	0.0255	0.662017	0.0379746	4.62e-68	-0.00302672	0.00136609	0.0267	0.0038	0.143	20
BRCA	cg01251360	16	NA	68772225	rs12926010	16	68787875	G	A	0.398608	-0.00235821	0.000776545	0.00239	0.719218	0.0309271	1.26e-119	-0.00327885	0.00108887	0.0026	0.00749	0.143	20
BRCA	cg23945952	19	NA	18874682	rs117878047	19	18786860	C	G	0.0596421	0.00433796	0.00146672	0.0031	-0.795291	0.0603782	1.27e-39	-0.00545456	0.00189018	0.0039	0.00688	0.142	11
BRCA	cg25689460	19	NA	18964859	rs117758034	19	18964865	T	C	0.0318091	-0.00332229	0.00194855	0.0882	-1.41461	0.0882883	8.88e-58	0.00234856	0.00138522	0.09	0.00715	0.142	20
BRCA	cg26642774	19	NA	18170383	rs12976908	19	18174377	G	A	0.399602	0.00169114	0.000773739	0.0288	-1.18648	0.0219715	0	-0.00142534	0.000652664	0.029	0.00823	0.142	20
BRCA	cg00308841	5	NA	90790737	rs332531	5	90790451	C	G	0.151093	-0.00417489	0.00105075	7.09e-05	0.444855	0.0469422	2.63e-21	-0.00938483	0.00256121	0.000248	0.00177	0.142	19
BRCA	cg03449857	6	NA	29648623	rs2747429	6	29648377	C	T	0.188867	-0.00067791	0.000877778	0.44	-1.34089	0.0240208	0	0.000505567	0.000654686	0.44	0.00725	0.142	20
BRCA	cg25978138	6	NA	29648161	rs2535238	6	29645038	A	C	0.188867	-0.000686887	0.000877617	0.434	-1.23505	0.0273139	0	0.000556161	0.000710699	0.434	0.00983	0.141	20
BRCA	cg25699073	6	NA	29648381	rs2747429	6	29648377	C	T	0.188867	-0.00067791	0.000877778	0.44	-1.28589	0.0261449	0	0.000527191	0.000682707	0.44	0.00695	0.141	20
BRCA	cg27503360	17	NA	43890749	rs12944712	17	43871147	A	G	0.468191	-0.00220486	0.000761574	0.00379	-0.297895	0.0324454	4.25e-20	0.00740147	0.0026806	0.00576	0.00576	0.141	20
BRCA	cg18410271	17	NA	43472435	rs112454267	17	44005329	A	G	0.240557	-0.00361803	0.000903831	6.25e-05	0.241967	0.0389146	5.04e-10	-0.0149526	0.00444249	0.000763	0.00328	0.141	8
BRCA	cg20228636	6	NA	29648525	rs2747429	6	29648377	C	T	0.188867	-0.00067791	0.000877778	0.44	-1.30281	0.0253626	0	0.000520345	0.000673834	0.44	0.00862	0.14	20
BRCA	cg06011067	6	NA	110677913	rs756487	6	110675112	C	T	0.215706	0.00141865	0.000912373	0.12	0.775007	0.0369057	6.6e-98	0.0018305	0.00118047	0.121	0.000883	0.14	20
BRCA	cg23892690	2	NA	201675739	rs3754937	2	201675353	G	C	0.450298	0.00243134	0.000764287	0.00147	-0.310359	0.0324516	1.14e-21	-0.00783396	0.00259525	0.00254	0.00601	0.14	20
BRCA	cg19895047	8	NA	19460197	rs7003381	8	19457965	G	A	0.0745527	0.00419651	0.00129821	0.00123	0.74333	0.053465	6.06e-44	0.00564555	0.00179306	0.00164	0.000777	0.138	20
BRCA	cg19360212	10	NA	123731471	rs11200293	10	123728710	T	C	0.166004	0.00222722	0.000999892	0.0259	-1.63141	0.0211798	0	-0.00136521	0.000613157	0.026	4.2e-11	0.138	20
BRCA	cg03714916	6	NA	36645886	rs2395655	6	36645696	G	A	0.379722	0.0029055	0.000778623	0.00019	-0.294896	0.0329585	3.64e-19	-0.00985263	0.00286075	0.000573	0.000573	0.137	20
BRCA	cg15570656	6	NA	29648628	rs2747429	6	29648377	C	T	0.188867	-0.00067791	0.000877778	0.44	-1.33686	0.0241136	0	0.000507091	0.000656661	0.44	0.00447	0.137	20
BRCA	cg25404088	22	NA	38143168	rs13057133	22	38179473	T	C	0.335984	-0.00178184	0.000823255	0.0304	0.602554	0.0346936	1.44e-67	-0.00295715	0.00137684	0.0317	0.00382	0.137	20
BRCA	cg06647332	5	NA	131281008	rs924434	5	131143369	A	C	0.215706	-0.00182458	0.000954659	0.056	-0.779584	0.0401097	3.81e-84	0.00234045	0.00123048	0.0572	0.000161	0.136	18
BRCA	cg04231319	10	NA	21824447	rs12251016	10	21821918	T	A	0.362823	0.00467616	0.000796722	4.38e-09	-0.280051	0.035309	2.17e-15	-0.0166975	0.00353915	2.38e-06	4.95e-06	0.136	20
BRCA	cg22359828	1	NA	181514216	rs1933049	1	181510739	T	C	0.439364	-2.69e-07	0.000760095	1	-0.332081	0.032162	5.42e-25	8.09e-07	0.00228888	1	0.00957	0.136	15
BRCA	cg09953425	20	NA	33451149	rs7265992	20	33525407	A	G	0.128231	0.00186443	0.000998766	0.0619	-0.412271	0.0407749	4.94e-24	-0.00452234	0.00246354	0.0664	0.000568	0.136	20
BRCA	cg14196790	5	NA	131705035	rs11242109	5	131677047	T	G	0.44334	0.00378904	0.000756575	5.5e-07	0.678274	0.0293281	2.47e-118	0.0055863	0.0011413	9.85e-07	4.2e-05	0.135	20
BRCA	cg13582692	6	NA	30022577	rs183708053	6	29931418	T	C	0.0357853	0.00574054	0.00194569	0.00317	-1.78316	0.0721455	7.17e-135	-0.00321931	0.00109889	0.00339	0.000706	0.135	19
BRCA	cg21737444	22	NA	38071591	rs62236671	22	38069305	A	G	0.338966	-0.000883306	0.000798143	0.268	0.738472	0.0307571	2.2e-127	-0.00119613	0.00108195	0.269	0.00312	0.134	20
BRCA	cg07059469	6	NA	152421432	rs9322361	6	152459143	G	A	0.17495	0.0041924	0.0010147	3.6e-05	-0.25055	0.0435542	8.79e-09	-0.0167328	0.00498622	0.000791	0.000791	0.134	5
BRCA	cg24100841	6	NA	29649024	rs2747421	6	29645118	C	G	0.188867	-0.00058025	0.000877652	0.509	-1.26988	0.0260751	0	0.000456933	0.000691194	0.509	0.00343	0.133	20
BRCA	cg10954938	17	NA	79532023	rs9913546	17	79571391	A	C	0.23161	-0.0029128	0.000903481	0.00126	0.484731	0.0380053	2.95e-37	-0.00600911	0.00192251	0.00177	0.00512	0.133	20
BRCA	cg24207176	4	NA	89079587	rs2725239	4	89075623	A	C	0.395626	-0.00143609	0.000759593	0.0587	-0.650461	0.0305327	1.05e-100	0.0022078	0.00117237	0.0597	0.00825	0.133	20
BRCA	cg25457927	22	NA	38595422	rs2899297	22	38594668	G	A	0.411531	-0.00240697	0.00077401	0.00187	-1.20968	0.0224492	0	0.00198976	0.000640912	0.00191	0.000642	0.132	20
BRCA	cg18304704	19	NA	18229454	rs8112975	19	18340910	G	A	0.274354	0.00312233	0.000861394	0.000289	0.202044	0.0365271	3.18e-08	0.0154537	0.00509727	0.00243	0.00243	0.132	20
BRCA	cg07493874	5	NA	1342172	rs421284	5	1325590	C	T	0.445328	0.00181701	0.000761562	0.017	-0.488034	0.0319894	1.5e-52	-0.00372312	0.00157944	0.0184	0.00139	0.132	20
BRCA	cg00721062	3	NA	46797928	rs114766251	3	46722189	C	A	0.0159046	-0.00607442	0.0025753	0.0183	0.807924	0.103553	6.09e-15	-0.00751855	0.00333004	0.024	0.00971	0.132	17
BRCA	cg12644888	6	NA	29648360	rs2747429	6	29648377	C	T	0.188867	-0.00067791	0.000877778	0.44	-1.15713	0.0296059	0	0.000585855	0.00075873	0.44	0.0066	0.132	20
BRCA	cg11212178	12	NA	95226807	rs6538555	12	95234278	G	A	0.257455	-0.0014722	0.000851062	0.0837	-1.06345	0.0289359	1.08e-295	0.00138436	0.00080117	0.084	0.00533	0.132	20
BRCA	cg21474062	3	NA	141087363	rs13098180	3	141091595	A	T	0.382704	0.00358915	0.000785829	4.94e-06	-0.227564	0.0344898	4.17e-11	-0.015772	0.00419986	0.000173	0.000173	0.131	7
BRCA	cg15641339	6	NA	22569638	rs16886454	6	22562975	A	T	0.196819	-0.00117253	0.000921715	0.203	0.516075	0.0379845	4.82e-42	-0.00227201	0.00179382	0.205	0.00915	0.13	20
BRCA	cg19577395	19	NA	5296992	rs59381028	19	5296420	A	G	0.470179	0.00153459	0.000769422	0.0461	-0.190066	0.0322233	3.67e-09	-0.00807399	0.00427335	0.0588	0.00789	0.129	6
BRCA	cg27384355	3	NA	99844353	rs9849632	3	99867211	A	G	0.366799	0.00446785	0.000770661	6.73e-09	1.00764	0.0267773	6.849892e-310	0.00443397	0.000773841	1.01e-08	2.73e-09	0.128	20
BRCA	cg11768167	6	NA	29690889	rs3095289	6	29649190	G	A	0.322068	0.00182684	0.000819545	0.0258	0.539011	0.0345916	9.63e-55	0.00338924	0.00153594	0.0273	0.00357	0.128	20
BRCA	cg14526375	3	NA	86703014	rs6782197	3	86717105	A	C	0.298211	-0.00233212	0.000819518	0.00443	-0.264022	0.0353088	7.57e-14	0.00883305	0.00332116	0.00782	0.00782	0.128	20
BRCA	cg08041448	6	NA	29648901	rs2747431	6	29648564	T	C	0.246521	-3.46e-06	0.000819152	0.997	-1.15366	0.0245044	0	3e-06	0.000710046	0.997	0.00446	0.128	20
BRCA	cg04186657	6	NA	29690893	rs3095289	6	29649190	G	A	0.322068	0.00182684	0.000819545	0.0258	0.538984	0.034388	2.29e-55	0.00338941	0.00153584	0.0273	0.00426	0.128	20
BRCA	cg25403205	6	NA	31584215	rs191306205	6	31739684	T	C	0.0308151	0.00238303	0.00237259	0.315	2.54665	0.0789608	3.29e-228	0.000935751	0.000932103	0.315	0.00573	0.127	20
BRCA	cg01175142	10	NA	118387327	rs12415178	10	118380345	T	C	0.351889	0.00192066	0.000778953	0.0137	0.358639	0.032862	9.94e-28	0.00535541	0.00222671	0.0162	0.00778	0.127	20
BRCA	cg26392102	6	NA	31238751	rs2524107	6	31232590	T	C	0.390656	0.000550532	0.000788153	0.485	-0.648092	0.0317439	1.2e-92	-0.000849466	0.00121682	0.485	0.00327	0.127	20
BRCA	cg17076443	6	NA	112115190	rs7749147	6	112164313	A	G	0.148111	-0.00397491	0.00110461	0.00032	0.369634	0.0463611	1.55e-15	-0.0107536	0.00327866	0.00104	0.00104	0.126	20
BRCA	cg11277126	20	NA	33680945	rs6060250	20	33704108	T	C	0.247515	0.00220254	0.000813875	0.00681	-0.403337	0.0346954	3.07e-31	-0.00546079	0.00207181	0.00839	0.00289	0.126	20
BRCA	cg14074428	5	NA	154008614	rs11167694	5	154008570	C	A	0.227634	-0.00287298	0.000927214	0.00194	-0.276897	0.037814	2.43e-13	0.0103756	0.00363603	0.00432	0.00432	0.126	4
BRCA	cg10111314	6	NA	28984642	rs142403264	6	29245760	C	T	0.511928	-0.00240976	0.00075554	0.00143	0.247994	0.0319599	8.52e-15	-0.00971701	0.00329393	0.00318	0.00353	0.124	16
BRCA	cg20388329	20	NA	3772433	rs113758978	20	3774157	A	C	0.0765408	0.00297855	0.00141385	0.0351	-2.30921	0.0392821	0	-0.00128986	0.000612659	0.0353	0.0014	0.124	20
BRCA	cg20442994	2	NA	25143872	rs6719538	2	25149531	A	G	0.083499	-0.00177661	0.00126419	0.16	-1.15989	0.0518851	1.08e-110	0.00153171	0.00109207	0.161	0.00529	0.123	20
BRCA	cg00594167	5	NA	131772039	rs4143335	5	131763174	T	C	0.137177	0.00170556	0.00116487	0.143	-1.51467	0.0417394	2.44e-288	-0.00112603	0.000769684	0.143	0.000555	0.123	20
BRCA	cg16956426	7	NA	94285286	rs10215799	7	94304344	C	T	0.279324	0.00281815	0.000840125	0.000795	0.208441	0.0352645	3.4e-09	0.0135201	0.00463434	0.00353	0.00353	0.122	9
BRCA	cg25234359	19	NA	18699219	rs10409392	19	18699333	A	C	0.450298	0.000971191	0.000762821	0.203	-1.11132	0.0223149	0	-0.000873908	0.000686634	0.203	0.00135	0.122	20
BRCA	cg04338129	11	NA	65635391	rs633800	11	65638719	G	A	0.497018	0.00239494	0.000755166	0.00152	0.246136	0.0324768	3.49e-14	0.00973015	0.00332587	0.00344	0.00733	0.122	20
BRCA	cg03361297	6	NA	29976906	rs145043018	6	29751401	C	G	0.290258	0.000304388	0.00080231	0.704	-0.488029	0.0336623	1.25e-47	-0.000623709	0.00164454	0.704	0.00266	0.121	20
BRCA	cg08576184	6	NA	151814892	rs11965449	6	151830598	C	T	0.135189	-0.00257559	0.00110891	0.0202	-0.486138	0.0463202	9.09e-26	0.00529806	0.00233625	0.0233	0.00645	0.121	20
BRCA	cg06108360	16	NA	84871405	rs8047416	16	84871409	T	C	0.124254	0.00250689	0.00125743	0.0462	-0.851967	0.0560374	3.35e-52	-0.00294247	0.00148855	0.0481	0.00201	0.121	14
BRCA	cg17518215	2	NA	172973241	rs2016394	2	172972971	A	G	0.45825	-0.00273428	0.000758179	0.000311	0.273711	0.0323695	2.77e-17	-0.00998966	0.00301141	0.000909	0.00559	0.121	10
BRCA	cg13835168	6	NA	29648756	rs2747431	6	29648564	T	C	0.246521	-3.46e-06	0.000819152	0.997	-1.17882	0.024059	0	2.94e-06	0.000694891	0.997	0.00525	0.12	20
BRCA	cg15298719	17	NA	7165255	rs222851	17	7139238	A	G	0.380716	-0.00172503	0.000773471	0.0257	0.676178	0.0308274	1.22e-106	-0.00255115	0.00114978	0.0265	0.00129	0.12	20
BRCA	cg10381888	6	NA	30228243	rs145463269	6	30211185	G	A	0.0447316	0.00510204	0.00189143	0.00699	-0.69663	0.0780841	4.6e-19	-0.00732389	0.0028365	0.00982	0.0077	0.119	18
BRCA	cg00588198	6	NA	29648452	rs2747431	6	29648564	T	C	0.246521	-3.46e-06	0.000819152	0.997	-1.18584	0.0239505	0	2.92e-06	0.000690778	0.997	0.00798	0.118	20
BRCA	cg20472707	20	NA	36889290	rs6123523	20	36889412	G	C	0.0576541	0.00361603	0.00170523	0.034	0.941053	0.0710888	5.31e-40	0.00384254	0.00183515	0.0363	0.00263	0.118	17
BRCA	cg04621893	10	NA	22624687	rs113979792	10	22038469	T	C	0.0208748	0.00839228	0.0027713	0.00246	-0.638549	0.1157	3.41e-08	-0.0131427	0.0049504	0.00793	0.00793	0.117	5
BRCA	cg26576978	6	NA	138718522	rs9495066	6	138709960	G	A	0.0636183	0.00457457	0.00158881	0.00399	-2.91531	0.0478384	0	-0.00156915	0.000545596	0.00403	0.00152	0.117	20
BRCA	cg04373334	4	NA	126238929	rs1039808	4	126239986	T	C	0.420477	-0.00333998	0.00076013	1.11e-05	0.397738	0.0323034	7.75e-35	-0.00839744	0.00202918	3.5e-05	0.00017	0.116	20
BRCA	cg19734801	5	NA	131281112	rs924434	5	131143369	A	C	0.215706	-0.00182458	0.000954659	0.056	-0.711121	0.040604	1.13e-68	0.00256578	0.00135044	0.0574	0.00279	0.116	18
BRCA	cg00846647	17	NA	44060252	rs111751251	17	44042951	T	C	0.238569	-0.00363628	0.000919896	7.72e-05	-1.18696	0.0317564	9.23e-306	0.00306352	0.000779324	8.46e-05	0.00152	0.116	20
BRCA	cg01471537	12	NA	101868726	rs76202035	12	101871237	C	T	0.0367793	0.00466085	0.00202386	0.0213	0.646592	0.0853092	3.47e-14	0.00720833	0.00327134	0.0276	0.0011	0.116	9
BRCA	cg03817107	5	NA	169532775	rs4315935	5	169534259	A	G	0.472167	0.00237247	0.00076567	0.00194	0.186365	0.032237	7.42e-09	0.0127302	0.00466137	0.00631	0.00631	0.115	17
BRCA	cg07578618	11	NA	1968453	rs9735581	11	1976041	G	A	0.477137	-0.00161822	0.000771116	0.0359	0.817707	0.0288757	2.06e-176	-0.00197897	0.000945608	0.0364	2.81e-05	0.115	20
BRCA	cg02157626	6	NA	29648736	rs2535238	6	29645038	A	C	0.188867	-0.000686887	0.000877617	0.434	-1.1965	0.0281544	0	0.00057408	0.000733611	0.434	0.00513	0.114	20
BRCA	cg16673477	19	NA	18812017	rs2003476	19	18806668	C	T	0.422465	-0.0025755	0.000773332	0.000867	-0.538056	0.0312594	2.14e-66	0.00478668	0.00146393	0.00108	0.00134	0.114	20
BRCA	cg21040575	17	NA	6921465	rs2307215	17	6902459	C	T	0.0725646	-0.00301204	0.00148227	0.0421	-1.46448	0.0566439	2.18e-147	0.00205673	0.00101527	0.0428	0.00556	0.113	20
BRCA	cg18007957	6	NA	152011666	rs12525163	6	152040291	C	T	0.267396	0.00295232	0.000849098	0.000507	0.382222	0.0365035	1.18e-25	0.0077241	0.00234076	0.000967	0.000507	0.113	20
BRCA	cg16996262	16	NA	69600303	rs17230612	16	69588152	A	G	0.082505	-0.00297235	0.00142285	0.0367	0.467847	0.0609145	1.59e-14	-0.00635325	0.00315176	0.0438	0.00653	0.112	5
BRCA	cg27238887	11	NA	824970	rs6597978	11	817286	G	C	0.44831	-0.00316107	0.000766046	3.68e-05	-0.296781	0.0333128	5.15e-19	0.0106512	0.00284462	0.000181	0.000181	0.112	20
BRCA	cg14271713	9	NA	136153846	rs529565	9	136149500	C	T	0.367793	0.00225247	0.000812136	0.00555	-0.515857	0.0366061	4.25e-45	-0.00436646	0.00160455	0.0065	0.00812	0.111	20
BRCA	cg17611235	11	NA	1991188	rs83998	11	1998171	G	C	0.341948	-0.000840012	0.000795163	0.291	-0.802426	0.0318666	6.51e-140	0.00104684	0.00099182	0.291	0.000445	0.11	20
BRCA	cg01921437	8	NA	3974145	rs7844914	8	3965376	C	G	0.245527	-0.00260134	0.000853908	0.00232	0.196589	0.0358435	4.14e-08	-0.0132324	0.00496868	0.00774	0.00774	0.109	6
BRCA	cg02996137	17	NA	5347973	rs3744711	17	5346599	G	A	0.164016	0.00150167	0.00109168	0.169	0.49368	0.0440319	3.57e-29	0.00304179	0.00222789	0.172	0.00381	0.109	20
BRCA	cg16617723	18	NA	24443905	rs12968026	18	24444150	C	T	0.121272	-0.00412613	0.00113964	0.000294	1.05889	0.0451761	1.71e-121	-0.00389666	0.00108902	0.000346	0.000925	0.108	20
BRCA	cg19317226	10	NA	130726701	rs4751025	10	130718628	G	A	0.142147	-0.00306526	0.00103666	0.00311	-0.315505	0.042556	1.23e-13	0.00971541	0.0035374	0.00602	0.00602	0.108	3
BRCA	cg25547332	5	NA	131281432	rs142958719	5	131232959	A	G	0.214712	-0.00186886	0.000957733	0.051	-0.697194	0.0406435	5.88e-66	0.00268055	0.00138256	0.0525	0.000238	0.107	16
BRCA	cg14202850	17	NA	43974869	rs1724390	17	43663247	A	C	0.243539	-0.00370009	0.000902899	4.17e-05	0.41482	0.038969	1.84e-26	-0.00891975	0.00233233	0.000131	0.00171	0.107	20
BRCA	cg19832721	17	NA	44249866	rs2668668	17	44284641	G	T	0.241551	-0.003536	0.000906	9.51e-05	1.28698	0.029736	0	-0.00274752	0.00070683	0.000101	0.00276	0.107	20
BRCA	cg04812347	6	NA	31584223	rs191306205	6	31739684	T	C	0.0308151	0.00238303	0.00237259	0.315	2.46162	0.0805394	3.67e-205	0.000968074	0.000964353	0.315	0.00791	0.106	20
BRCA	cg21157690	6	NA	152126895	rs11756568	6	152042413	T	A	0.269384	0.00290597	0.000847368	0.000605	-0.312438	0.0366603	1.56e-17	-0.00930095	0.00292346	0.00147	0.00131	0.106	20
BRCA	cg17597901	7	NA	39874082	rs1005311	7	39880053	G	A	0.33002	-0.00142757	0.000804259	0.0759	-0.667219	0.0326477	7.85e-93	0.00213958	0.00120993	0.077	0.00622	0.106	20
BRCA	cg24432078	10	NA	130229935	rs12782052	10	130229843	G	T	0.40159	0.00240571	0.000776133	0.00194	0.226397	0.0328665	5.64e-12	0.0106261	0.00375928	0.0047	0.0047	0.106	5
BRCA	cg23135908	11	NA	1989715	rs10840140	11	2002472	T	C	0.225646	-0.0021785	0.00091862	0.0177	-0.328327	0.0397247	1.4e-16	0.00663515	0.00291078	0.0226	0.00362	0.105	20
BRCA	cg17878320	5	NA	142922506	rs75872293	5	142930374	G	A	0.0874751	0.00154212	0.00151127	0.308	-0.74151	0.063722	2.68e-31	-0.0020797	0.00204592	0.309	0.00893	0.104	11
BRCA	cg09410830	6	NA	112041335	rs706895	6	112041359	C	T	0.227634	-0.0016358	0.000885898	0.0648	0.452532	0.0377123	3.57e-33	-0.00361477	0.00198069	0.068	0.00814	0.103	20
BRCA	cg24764793	6	NA	152126745	rs862346	6	152016369	T	A	0.447316	0.00282088	0.000771075	0.000254	-0.228045	0.0329622	4.57e-12	-0.0123698	0.00382487	0.00122	0.00809	0.103	12
BRCA	cg05301556	17	NA	43971177	rs10445363	17	43914558	A	G	0.239563	-0.0035697	0.000904279	7.9e-05	-0.558812	0.0393179	7.65e-46	0.00638802	0.00167948	0.000143	0.00329	0.103	20
BRCA	cg22349396	17	NA	4803684	rs3760490	17	4807926	A	G	0.154076	-0.00298795	0.00109762	0.00648	-0.392226	0.0463744	2.72e-17	0.00761793	0.00293981	0.00956	0.00956	0.102	20
BRCA	cg22965079	19	NA	14800530	rs12980501	19	14802442	A	G	0.224652	0.00195052	0.000919639	0.0339	1.06767	0.0352103	5.76e-202	0.00182689	0.000863456	0.0344	0.00286	0.102	20
BRCA	cg03809021	16	NA	89831123	rs7206317	16	89848203	G	C	0.188867	0.000359802	0.000996023	0.718	1.19956	0.0358405	1.34e-245	0.000299945	0.000830372	0.718	0.00846	0.102	20
BRCA	cg23670188	11	NA	1905808	rs661348	11	1905292	C	T	0.425447	-0.00330327	0.000770917	1.83e-05	0.227908	0.0322047	1.47e-12	-0.0144939	0.00395429	0.000247	0.000247	0.101	15
BRCA	cg13787775	1	NA	204571258	rs146935278	1	204528149	C	G	0.0159046	-0.0105003	0.00366555	0.00418	-1.04169	0.142591	2.76e-13	0.0100801	0.0037797	0.00766	0.00789	0.101	3
BRCA	cg14143723	3	NA	27638612	rs2724506	3	27637962	C	T	0.492048	-2.54e-05	0.000757542	0.973	-0.823613	0.0285194	2.19e-183	3.08e-05	0.00091978	0.973	0.00652	0.1	20
BRCA	cg11674355	2	NA	65610261	rs934734	2	65595586	A	G	0.499006	0.00156145	0.000755586	0.0388	-0.607595	0.0310599	3.26e-85	-0.00256989	0.00125049	0.0399	0.00446	0.1	20
BRCA	cg04270048	20	NA	33296729	rs6059972	20	33252298	C	T	0.117296	0.00248217	0.000988355	0.012	0.542536	0.0385449	5.38e-45	0.00457512	0.0018505	0.0134	0.0017	0.1	20
BRCA	cg03162506	22	NA	38580953	rs5756968	22	38595240	C	T	0.411531	-0.00241541	0.000774249	0.00181	0.644705	0.0324307	6.13e-88	-0.00374654	0.00121563	0.00206	0.00354	0.0993	20
BRCA	cg06632027	4	NA	90757378	rs1372520	4	90757505	T	C	0.212724	-0.00159471	0.000914415	0.0812	0.760964	0.0376613	8.77e-91	-0.00209564	0.00120612	0.0823	0.00891	0.099	20
BRCA	cg18745416	6	NA	152011399	rs851996	6	152016803	T	C	0.446322	0.00280422	0.000771137	0.000276	0.334279	0.0327807	2.04e-24	0.00838886	0.00244916	0.000614	0.000102	0.0983	20
BRCA	cg03891268	3	NA	195920019	rs9875719	3	195901976	G	T	0.223658	0.000613907	0.000959725	0.522	0.441923	0.0436657	4.48e-24	0.00138917	0.00217604	0.523	0.00671	0.0983	20
BRCA	cg09179723	6	NA	30704955	rs180854658	6	30697008	C	A	0.0387674	0.00284255	0.00214445	0.185	-0.74759	0.0935767	1.36e-15	-0.00380228	0.0029077	0.191	0.00436	0.0982	15
BRCA	cg17564775	5	NA	127873106	rs79813368	5	127921198	A	G	0.0815109	-0.00245781	0.00136072	0.0709	-0.600424	0.0564555	2.04e-26	0.00409346	0.00229872	0.075	0.00513	0.0979	20
BRCA	cg03554962	16	NA	86404423	rs7186259	16	86404608	G	C	0.369781	0.000954243	0.000776184	0.219	-0.48689	0.0323206	2.78e-51	-0.00195987	0.00159947	0.22	0.00435	0.0976	20
BRCA	cg15295732	17	NA	43942128	rs112310745	17	44082432	A	G	0.240557	-0.00357392	0.000909524	8.51e-05	-0.716332	0.0384095	1.27e-77	0.00498919	0.00129757	0.000121	0.00275	0.0965	20
BRCA	cg24912415	20	NA	33585435	rs6120827	20	33672123	A	T	0.23161	0.00233188	0.000823388	0.00462	-0.434704	0.0345799	3.05e-36	-0.00536429	0.00194161	0.00573	0.00106	0.0964	20
BRCA	cg21667367	2	NA	172974217	rs17726121	2	172974749	T	C	0.175944	0.000987481	0.00103074	0.338	-0.815863	0.0397808	1.79e-93	-0.00121035	0.00126475	0.339	0.0092	0.0962	20
BRCA	cg12614213	8	NA	38324613	rs17175624	8	38327308	T	G	0.380716	-0.00225011	0.000771363	0.00353	-0.182673	0.0318066	9.29e-09	0.0123177	0.00473609	0.0093	0.0093	0.096	5
BRCA	cg19619909	15	NA	58306464	rs8026700	15	57863241	A	G	0.477137	0.00257707	0.000763004	0.000731	-0.190159	0.0326963	6.03e-09	-0.0135522	0.00463999	0.00349	0.00683	0.0957	16
BRCA	cg22920258	22	NA	41074803	rs133054	22	41050608	T	G	0.436382	-0.00306879	0.000757982	5.15e-05	-0.190888	0.0322324	3.18e-09	0.0160764	0.00481003	0.000831	0.000831	0.0953	8
BRCA	cg22066108	4	NA	3534761	rs10007398	4	3523863	G	A	0.400596	-0.00233563	0.000770842	0.00245	0.23212	0.0323909	7.71e-13	-0.0100622	0.00360552	0.00526	0.00526	0.0952	18
BRCA	cg10489614	1	NA	98512194	rs4271249	1	98398619	G	T	0.420477	0.00229382	0.000770489	0.00291	-0.269184	0.0336133	1.16e-15	-0.00852138	0.0030537	0.00526	0.00633	0.0952	20
BRCA	cg16690356	6	NA	29945948	rs149543464	6	30400763	A	G	0.082505	-0.00083559	0.00108	0.439	-1.34107	0.0376239	2.91e-278	0.000623077	0.000805517	0.439	0.00239	0.0952	20
BRCA	cg09505516	2	NA	25110296	rs10164842	2	25113803	T	C	0.315109	-0.00204439	0.000801989	0.0108	-0.762969	0.0309631	4.57e-134	0.00267952	0.00105675	0.0112	0.00171	0.0935	20
BRCA	cg27303933	5	NA	56029418	rs57850701	5	56024356	G	A	0.0984095	0.0079919	0.00127782	3.99e-10	-0.328566	0.0537845	1e-09	-0.0243236	0.00556582	1.24e-05	1.24e-05	0.0933	10
BRCA	cg16465129	5	NA	131408149	rs27437	5	131436961	G	A	0.460239	0.00227793	0.000767379	0.00299	0.176905	0.0305974	7.39e-09	0.0128766	0.00487613	0.00827	0.00827	0.0925	17
BRCA	cg15763899	11	NA	72281327	rs12577155	11	72276600	G	A	0.124254	0.00236397	0.00120942	0.0506	0.456796	0.0505009	1.49e-19	0.00517511	0.00270873	0.0561	0.0026	0.0918	18
BRCA	cg20684110	10	NA	64565750	rs1848797	10	64552934	G	A	0.363817	0.00229616	0.000772169	0.00294	-0.216308	0.0331965	7.22e-11	-0.0106152	0.00392393	0.00683	0.00683	0.0909	18
BRCA	cg15624719	4	NA	124917187	rs72672875	4	124917965	C	G	0.0735586	0.00100771	0.00150431	0.503	-2.30929	0.0381199	0	-0.000436372	0.000651457	0.503	0.00264	0.0907	20
BRCA	cg15133208	4	NA	90757351	rs1372520	4	90757505	T	C	0.212724	-0.00159471	0.000914415	0.0812	0.757708	0.0372734	7.21e-92	-0.00210465	0.00121125	0.0823	0.00631	0.0907	20
BRCA	cg21234082	9	NA	124363848	rs60631092	9	124362522	T	C	0.285288	-0.00179069	0.000848827	0.0349	-1.27922	0.0243892	0	0.00139983	0.000664087	0.035	0.00083	0.0906	20
BRCA	cg09430642	8	NA	128427306	rs4871022	8	128427720	C	T	0.38171	-0.00253418	0.000768041	0.000968	1.09965	0.023546	0	-0.00230453	0.000700182	0.000997	3.71e-08	0.0884	20
BRCA	cg15469655	3	NA	33245094	rs34339288	3	33245185	T	C	0.0884692	-0.00235936	0.00122376	0.0539	0.524958	0.055934	6.27e-21	-0.00449438	0.00237984	0.059	0.00467	0.0879	20
BRCA	cg11268077	3	NA	99657029	rs10511177	3	99724873	A	G	0.210736	0.00366954	0.000892016	3.89e-05	-0.260417	0.0370376	2.05e-12	-0.014091	0.00396854	0.000384	0.000384	0.0876	20
BRCA	cg27578381	17	NA	76814686	rs62075626	17	76814400	G	A	0.206759	0.00274188	0.000950458	0.00392	0.568549	0.0391077	6.95e-48	0.00482259	0.00170432	0.00466	0.00799	0.087	20
BRCA	cg11992736	19	NA	18197544	rs436857	19	18197635	A	G	0.180915	0.00285605	0.000939458	0.00236	0.430287	0.0404628	2.07e-26	0.00663755	0.0022708	0.00347	0.00734	0.087	20
BRCA	cg22635041	10	NA	93804898	rs833374	10	93791409	A	G	0.267396	0.00267414	0.000834126	0.00135	0.202707	0.0353073	9.4e-09	0.0131921	0.00471302	0.00512	0.00512	0.0869	6
BRCA	cg02309431	20	NA	31618931	rs6059034	20	31623170	T	C	0.387674	-0.00129615	0.000781542	0.0972	0.63387	0.0317108	6.85e-89	-0.00204482	0.00123721	0.0984	0.005	0.0865	20
BRCA	cg14014225	22	NA	38479236	rs2413493	22	38448295	C	G	0.410537	-0.00286544	0.000771858	0.000205	-0.185777	0.0264571	2.19e-12	0.0154241	0.00469968	0.00103	0.00103	0.0862	20
BRCA	cg21155100	5	NA	56147662	rs56008823	5	56068014	G	T	0.0964215	0.00779242	0.00125306	5.01e-10	-0.543015	0.052347	3.28e-25	-0.0143503	0.00269049	9.62e-08	9.74e-08	0.0858	20
BRCA	cg13566430	5	NA	131992455	rs17622991	5	131932753	A	G	0.203777	0.00106237	0.000956713	0.267	-0.492029	0.0400184	9.63e-35	-0.00215916	0.00195234	0.269	0.00273	0.0855	20
BRCA	cg23143093	3	NA	27333024	rs653076	3	27343691	C	T	0.263419	0.00338419	0.000837096	5.28e-05	-0.31728	0.0340135	1.08e-20	-0.0106663	0.00287548	0.000208	6.43e-05	0.0853	20
BRCA	cg00256231	17	NA	77916733	rs34507713	17	77919289	A	G	0.201789	-0.000692358	0.000945229	0.464	0.620903	0.0378147	1.38e-60	-0.00111508	0.00152386	0.464	0.00703	0.085	17
BRCA	cg27589368	17	NA	43923255	rs169201	17	44790203	G	A	0.224652	-0.00310498	0.000920049	0.000739	-0.376811	0.0403071	8.89e-21	0.00824015	0.0025959	0.0015	0.0015	0.085	20
BRCA	cg11908155	8	NA	11625764	rs4840583	8	11635946	T	C	0.463221	-0.00200402	0.000765304	0.00883	-0.388937	0.0316541	1.06e-34	0.00515256	0.00201187	0.0104	0.0038	0.0843	20
BRCA	cg09989681	11	NA	1892043	rs61868776	11	1890321	T	C	0.256461	0.00323687	0.000851996	0.000145	0.26603	0.0376312	1.56e-12	0.0121673	0.00363581	0.000818	0.00112	0.0843	19
BRCA	cg19814159	6	NA	28719517	rs3129102	6	29205336	T	C	0.166998	0.00376219	0.00106147	0.000394	-0.294255	0.0447371	4.79e-11	-0.0127855	0.00409771	0.00181	0.00739	0.0829	4
BRCA	cg17546623	10	NA	94165278	rs2798249	10	94155846	A	G	0.317097	0.00242534	0.000800212	0.00244	0.256755	0.0342897	7e-14	0.00944613	0.00336227	0.00496	0.00496	0.0817	17
BRCA	cg14295924	11	NA	1990900	rs83998	11	1998171	G	C	0.341948	-0.000840012	0.000795163	0.291	-0.522223	0.0338243	8.91e-54	0.00160853	0.00152621	0.292	0.00533	0.0815	20
BRCA	cg00601836	6	NA	152130332	rs11756568	6	152042413	T	A	0.269384	0.00290597	0.000847368	0.000605	-0.415812	0.0362531	1.87e-30	-0.00698866	0.00212701	0.00102	0.000338	0.0814	20
BRCA	cg14346046	11	NA	27494792	rs10767643	11	27496161	G	T	0.0477137	0.0043411	0.00179244	0.0154	1.18358	0.087168	5.4e-42	0.00366777	0.00153832	0.0171	0.00104	0.0813	20
BRCA	cg19755007	11	NA	11643760	rs79462091	11	11642438	C	T	0.192843	-0.00225907	0.000918762	0.0139	0.808648	0.0352315	1.39e-116	-0.00279364	0.00114267	0.0145	0.00683	0.081	20
BRCA	cg06731443	11	NA	27494710	rs10767643	11	27496161	G	T	0.0477137	0.0043411	0.00179244	0.0154	1.61914	0.0848783	4e-81	0.00268111	0.00111592	0.0163	0.00118	0.0799	20
BRCA	cg09242541	1	NA	10490025	rs524150	1	10492940	G	C	0.493042	-0.00223097	0.000757227	0.00322	-0.628736	0.0309927	1.69e-91	0.00354834	0.001217	0.00355	0.00502	0.0797	20
BRCA	cg01590338	14	NA	101831332	rs10138433	14	101822168	G	T	0.0735586	0.00159197	0.00146718	0.278	-1.19738	0.0573734	1e-96	-0.00132954	0.00122698	0.279	0.00571	0.0795	20
BRCA	cg11961495	10	NA	80873797	rs11818019	10	80873647	T	C	0.23161	-0.00202764	0.000909744	0.0258	-0.729957	0.036962	8.21e-87	0.00277775	0.00125421	0.0268	0.000802	0.0792	20
BRCA	cg03863486	6	NA	138724410	rs2274659	6	138725677	A	G	0.0516899	0.00461032	0.00164754	0.00514	1.63099	0.0748482	2.85e-105	0.0028267	0.00101844	0.00551	0.000462	0.0788	20
BRCA	cg25828334	19	NA	18545568	rs8105994	19	18593553	C	T	0.34493	-0.00346909	0.000794652	1.27e-05	-0.858187	0.030407	3.02e-175	0.00404235	0.000936978	1.6e-05	5.65e-05	0.0776	20
BRCA	cg22444445	2	NA	25354986	rs112547779	2	25362584	A	G	0.028827	0.00127546	0.00210938	0.545	1.96382	0.0931713	1.28e-98	0.000649479	0.00107456	0.546	0.00936	0.0774	13
BRCA	cg15626350	6	NA	152130207	rs1101080	6	152033643	T	G	0.269384	0.00290781	0.000849335	0.000618	-0.443692	0.0357887	2.69e-35	-0.00655367	0.00198589	0.000966	0.000178	0.0769	20
BRCA	cg14654363	6	NA	28601443	rs1150688	6	28162780	C	T	0.377734	0.00119312	0.000773131	0.123	0.226434	0.0342348	3.74e-11	0.00526917	0.00350608	0.133	0.00979	0.0763	20
BRCA	cg04316537	2	NA	102589889	rs34411618	2	102590513	T	G	0.324056	-0.00171379	0.000819799	0.0366	-1.42456	0.0151093	0	0.00120303	0.000575617	0.0366	0.00484	0.0752	20
BRCA	cg20893956	6	NA	152126736	rs862346	6	152016369	T	A	0.447316	0.00282088	0.000771075	0.000254	-0.324786	0.0327134	3.14e-23	-0.00868535	0.00253015	0.000598	0.000224	0.0748	20
BRCA	cg02936049	3	NA	141102599	rs73872719	3	141134975	C	T	0.0477137	0.00218878	0.00179245	0.222	-1.41227	0.0706979	8.88e-89	-0.00154983	0.00127157	0.223	0.000296	0.0747	20
BRCA	cg22043296	11	NA	1892139	rs61868776	11	1890321	T	C	0.256461	0.00323687	0.000851996	0.000145	0.243786	0.0377354	1.04e-10	0.0132775	0.00405437	0.00106	0.00293	0.0744	11
BRCA	cg00737841	10	NA	130726624	rs4751025	10	130718628	G	A	0.142147	-0.00306526	0.00103666	0.00311	-0.395804	0.0423116	8.4e-21	0.00774439	0.00274685	0.00481	0.00736	0.0741	3
BRCA	cg06657028	6	NA	30080495	rs149543464	6	30400763	A	G	0.082505	-0.00083559	0.00108	0.439	-1.24095	0.0389187	4.21e-223	0.000673347	0.000870557	0.439	0.00282	0.0741	20
BRCA	cg08670715	17	NA	44341754	rs113313477	17	44005186	A	G	0.240557	-0.00359616	0.000903536	6.89e-05	0.477516	0.0386004	3.76e-35	-0.00753097	0.00198768	0.000151	0.00424	0.0739	20
BRCA	cg26006214	19	NA	18405615	rs67482294	19	18405616	A	G	0.250497	-0.00111832	0.000886782	0.207	-1.36498	0.0228711	0	0.000819294	0.000649812	0.207	0.00294	0.0736	20
BRCA	cg00573338	22	NA	38479099	rs4821736	22	38491370	G	A	0.476143	-0.00206056	0.000757327	0.00651	-0.336745	0.0321808	1.26e-25	0.00611905	0.00232374	0.00846	0.000253	0.0735	20
BRCA	cg27615366	5	NA	131592974	rs6871350	5	131580220	T	C	0.472167	-0.00344339	0.000762723	6.34e-06	-0.237286	0.0316487	6.5e-14	0.0145116	0.00375211	0.00011	0.00011	0.073	20
BRCA	cg00369909	22	NA	42060908	rs4239895	22	42198093	G	C	0.420477	0.000732474	0.000762509	0.337	0.443206	0.03247	2.03e-42	0.00165267	0.00172469	0.338	0.00264	0.0728	20
BRCA	cg04063345	6	NA	152130058	rs1101080	6	152033643	T	G	0.269384	0.00290781	0.000849335	0.000618	-0.409664	0.0361794	1.01e-29	-0.00709804	0.00216594	0.00105	0.00135	0.0725	20
BRCA	cg17115250	6	NA	28557291	rs3129102	6	29205336	T	C	0.166998	0.00376219	0.00106147	0.000394	0.24031	0.0449499	8.98e-08	0.0156556	0.00529962	0.00314	0.00444	0.0713	3
BRCA	cg16625770	8	NA	38300134	rs17175624	8	38327308	T	G	0.380716	-0.00225011	0.000771363	0.00353	0.349313	0.0326198	9.27e-27	-0.00644153	0.00228869	0.00489	0.00324	0.0706	20
BRCA	cg01456640	4	NA	3502381	rs6850908	4	3494898	T	C	0.223658	-0.00234634	0.000932847	0.0119	-0.479221	0.0388715	6.38e-35	0.00489615	0.00198669	0.0137	0.00498	0.069	20
BRCA	cg26591679	11	NA	1980392	rs739905	11	1980360	G	C	0.507952	-0.0017185	0.000759723	0.0237	0.601193	0.0315038	3.48e-81	-0.00285848	0.00127254	0.0247	0.00315	0.068	20
BRCA	cg26658897	5	NA	77843030	rs11750781	5	77766019	C	T	0.228628	-0.00265453	0.000900762	0.00321	-0.300695	0.0368082	3.1e-16	0.00882798	0.00318456	0.00557	0.0028	0.0672	20
BRCA	cg24428144	12	NA	28180450	rs16932559	12	28181233	C	T	0.10835	-0.00722188	0.0011703	6.79e-10	1.25726	0.0436973	4.8e-182	-0.00574414	0.000952003	1.6e-09	2.14e-07	0.0671	20
BRCA	cg01901788	20	NA	33145848	rs2144956	20	33145868	G	A	0.126243	0.00250305	0.000988123	0.0113	0.705118	0.0389749	3.71e-73	0.00354983	0.00141503	0.0121	0.00167	0.0664	20
BRCA	cg27311041	5	NA	1300340	rs2853672	5	1292983	C	A	0.512922	-0.00197136	0.000760131	0.0095	-0.224796	0.0323931	3.93e-12	0.00876955	0.00360984	0.0151	0.00285	0.065	9
BRCA	cg12889594	11	NA	69260314	rs4334037	11	69256482	C	A	0.482107	-0.00273095	0.000759592	0.000324	-0.391577	0.0326235	3.43e-33	0.00697423	0.00202498	0.000573	7.89e-05	0.0645	11
BRCA	cg08862499	17	NA	44271469	rs111273167	17	43740967	T	C	0.239563	-0.00359554	0.000904189	6.99e-05	-0.255888	0.0369105	4.13e-12	0.0140512	0.00407355	0.000562	0.000562	0.0645	16
BRCA	cg16063312	10	NA	22725587	rs11012984	10	22690624	A	G	0.0646123	0.00158868	0.00134966	0.239	0.637471	0.0544582	1.19e-31	0.00249216	0.00212789	0.242	0.0048	0.064	20
BRCA	cg03850113	16	NA	8622884	rs12103064	16	8622885	A	G	0.0218688	0.00171715	0.00257559	0.505	-2.48697	0.117952	1.1e-98	-0.000690459	0.00103615	0.505	0.00603	0.0639	15
BRCA	cg10196558	1	NA	155043921	rs3766916	1	155049402	T	C	0.40159	-0.00101901	0.000767894	0.185	0.337841	0.0329898	1.3e-24	-0.00301624	0.00229195	0.188	0.00431	0.0636	20
BRCA	cg06211724	1	NA	183155437	rs2276543	1	183155305	A	G	0.293241	0.000299203	0.000845063	0.723	-0.357945	0.0362784	5.81e-23	-0.000835891	0.00236239	0.723	0.00158	0.0635	20
BRCA	cg14472716	9	NA	137236548	rs12006435	9	137230473	A	G	0.106362	-0.00302921	0.0011511	0.0085	0.80121	0.048355	1.16e-61	-0.00378079	0.00145471	0.00935	0.00924	0.0635	20
BRCA	cg24655566	20	NA	31669279	rs7272741	20	31665880	G	A	0.0894632	0.0019623	0.00118208	0.0969	-0.863881	0.0455609	3.58e-80	-0.00227149	0.00137357	0.0982	0.0021	0.0633	20
BRCA	cg07033202	3	NA	46853631	rs139189113	3	46813377	A	T	0.0298211	-0.0040946	0.00267791	0.126	0.833845	0.101405	1.99e-16	-0.0049105	0.00326657	0.133	0.00611	0.0633	14
BRCA	cg12445775	18	NA	24445692	rs455671	18	24442056	G	A	0.191849	0.000692547	0.000972984	0.477	-1.56547	0.025403	0	-0.000442389	0.00062157	0.477	0.000927	0.0631	20
BRCA	cg03060555	3	NA	141131189	rs13069734	3	141148419	A	G	0.310139	0.00304146	0.000802058	0.000149	-0.149192	0.0203959	2.58e-13	-0.0203862	0.00605547	0.000761	0.00299	0.0621	8
BRCA	cg24057642	19	NA	17357641	rs66606313	19	17345427	G	C	0.466203	-0.00203748	0.000770274	0.00817	0.336272	0.0322404	1.81e-25	-0.00605902	0.00236314	0.0103	0.00598	0.0619	20
BRCA	cg09181015	5	NA	158104558	rs33191	5	158103815	A	G	0.22664	-7.01e-05	0.000873961	0.936	0.526913	0.0367463	1.24e-46	-0.000133026	0.00165867	0.936	0.000939	0.0615	20
BRCA	cg26865747	6	NA	28601377	rs276371	6	27910708	T	A	0.357853	0.0019803	0.000781051	0.0112	0.212368	0.0342507	5.63e-10	0.00932485	0.00397342	0.0189	0.00182	0.0613	20
BRCA	cg27543403	5	NA	58335880	rs10514871	5	58342315	G	T	0.332008	-0.00262479	0.000812315	0.00123	0.383629	0.0351076	8.54e-28	-0.006842	0.00220809	0.00194	0.00133	0.0604	20
BRCA	cg22904711	19	NA	44278628	rs62116961	19	44283843	C	G	0.34493	0.00322719	0.000783182	3.78e-05	-0.267522	0.0329083	4.32e-16	-0.0120633	0.00328215	0.000237	0.000881	0.0592	20
BRCA	cg24293507	1	NA	10511793	rs628462	1	10511544	T	C	0.390656	0.00218803	0.000782357	0.00516	-0.341331	0.0335128	2.31e-24	-0.00641029	0.00237692	0.007	0.00472	0.0588	20
BRCA	cg16577356	6	NA	53600006	rs6911995	6	53605857	C	G	0.407555	0.00152292	0.000783784	0.052	0.309532	0.0330695	7.97e-21	0.00492007	0.00258614	0.0571	0.00957	0.0586	20
BRCA	cg21529477	11	NA	1892092	rs61868776	11	1890321	T	C	0.256461	0.00323687	0.000851996	0.000145	0.28845	0.0371841	8.67e-15	0.0112216	0.00328891	0.000645	0.00233	0.0581	18
BRCA	cg10593816	12	NA	95397809	rs249181	12	95403521	G	A	0.133201	-0.00260622	0.00103277	0.0116	0.940349	0.0410934	6.83e-116	-0.00277155	0.00110494	0.0121	0.00285	0.0572	20
BRCA	cg01068407	7	NA	150714809	rs12539718	7	150718522	G	C	0.253479	-0.00274425	0.000855634	0.00134	0.640719	0.0353258	1.61e-73	-0.00428308	0.00135615	0.00159	0.000951	0.0572	20
BRCA	cg09816282	12	NA	115736146	rs1882153	12	115720124	T	G	0.392644	-0.00186518	0.000768758	0.0153	0.383407	0.0326827	8.82e-32	-0.00486475	0.0020475	0.0175	0.000168	0.0567	20
BRCA	cg23584176	6	NA	29365078	rs4713216	6	29364147	G	A	0.452286	-0.00258116	0.000763304	0.000721	-0.841061	0.0287938	1.46e-187	0.00306893	0.00091361	0.000782	0.0021	0.0567	20
BRCA	cg13467162	11	NA	65600888	rs59416249	11	65601466	T	C	0.135189	0.00323612	0.00112487	0.00402	0.353077	0.0479901	1.88e-13	0.00916548	0.00342081	0.00738	0.00738	0.0566	5
BRCA	cg17413149	10	NA	50942972	rs1258177	10	50957307	C	A	0.342942	-0.00159881	0.000800161	0.0457	-0.292195	0.0333343	1.86e-18	0.00547172	0.00280869	0.0514	0.000307	0.0566	20
BRCA	cg02034085	14	NA	69261594	rs72725183	14	68538217	T	C	0.173956	0.00301325	0.00105825	0.00441	0.280019	0.0437011	1.48e-10	0.0107609	0.00413555	0.00927	0.00927	0.0564	16
BRCA	cg20592836	20	NA	33292126	rs6120730	20	33385102	C	G	0.382704	0.00108182	0.000775925	0.163	1.35488	0.013959	0	0.000798462	0.000572748	0.163	0.00887	0.0564	20
BRCA	cg05721485	17	NA	44071124	rs111970616	17	44169581	C	T	0.240557	-0.00360264	0.000903954	6.74e-05	0.372114	0.0386147	5.6e-22	-0.00968155	0.00262879	0.000231	0.00191	0.0562	20
BRCA	cg11366788	12	NA	95397732	rs249181	12	95403521	G	A	0.133201	-0.00260622	0.00103277	0.0116	0.87848	0.0417756	3.6e-98	-0.00296674	0.00118407	0.0122	0.00617	0.0562	20
BRCA	cg24117468	5	NA	131562848	rs12521097	5	131575338	A	G	0.4334	0.00348275	0.00075745	4.27e-06	0.697767	0.0286919	1.23e-130	0.00499128	0.00110477	6.24e-06	3.1e-05	0.056	20
BRCA	cg04218899	1	NA	183155366	rs2276543	1	183155305	A	G	0.293241	0.000299203	0.000845063	0.723	-0.366912	0.0364503	7.8e-24	-0.000815463	0.0023046	0.723	0.00122	0.0556	20
BRCA	cg24371574	1	NA	230428167	rs6689887	1	230419152	T	C	0.501988	0.000494897	0.000760102	0.515	-0.431151	0.0317345	4.84e-42	-0.00114785	0.00176498	0.515	0.00645	0.0554	20
BRCA	cg01005506	10	NA	64565768	rs1848797	10	64552934	G	A	0.363817	0.00229616	0.000772169	0.00294	-0.277818	0.0330933	4.66e-17	-0.00826498	0.00294862	0.00506	0.00697	0.0552	20
BRCA	cg08659183	3	NA	141032945	rs9871963	3	141033481	G	A	0.34493	0.00288056	0.000794657	0.000289	-0.288762	0.0336535	9.45e-18	-0.00997555	0.00298744	0.00084	0.000663	0.0545	17
BRCA	cg04172426	22	NA	17653367	rs8139868	22	17653367	T	C	0.277336	0.00205144	0.000826571	0.0131	-0.644261	0.0327361	3.17e-86	-0.00318418	0.00129314	0.0138	0.00974	0.0543	20
BRCA	cg23304605	14	NA	91866373	rs1285823	14	91855826	T	C	0.0228628	-0.00785056	0.00237034	0.000926	0.888444	0.0910508	1.71e-22	-0.0088363	0.00281747	0.00171	0.00923	0.0543	8
BRCA	cg05929019	1	NA	183155154	rs2276543	1	183155305	A	G	0.293241	0.000299203	0.000845063	0.723	-0.372303	0.0366896	3.4e-24	-0.000803655	0.00227121	0.723	0.00084	0.0541	20
BRCA	cg17757980	10	NA	46971495	rs62634832	10	47639027	C	G	0.353877	-0.00259827	0.000840311	0.00199	0.237535	0.0352481	1.6e-11	-0.0109385	0.00389224	0.00495	0.00968	0.0538	16
BRCA	cg18405544	5	NA	67615770	rs451157	5	67616407	G	A	0.266402	-0.00243017	0.000854581	0.00446	-1.13971	0.0281492	0	0.00213227	0.00075167	0.00456	0.00276	0.0532	20
BRCA	cg05988645	16	NA	8715306	rs6498214	16	8716107	A	C	0.105368	0.00332882	0.00129079	0.00991	-0.955969	0.0537177	7.57e-71	-0.00348214	0.00136435	0.0107	0.00464	0.0525	20
BRCA	cg27661460	16	NA	88844969	rs9933309	16	88844932	T	C	0.291252	-0.00201581	0.000822864	0.0143	-1.14661	0.0267228	0	0.00175806	0.000718818	0.0145	0.00449	0.0525	20
BRCA	cg06455375	11	NA	1947743	rs540710	11	1947575	A	C	0.37674	-0.00362218	0.000792759	4.9e-06	-0.359609	0.0333879	4.74e-27	0.0100726	0.00239466	2.6e-05	4.14e-05	0.0521	20
BRCA	cg27642771	20	NA	3762167	rs2281479	20	3762095	C	T	0.227634	-0.00145624	0.000899333	0.105	0.533272	0.0362592	5.8e-49	-0.00273076	0.00169663	0.108	0.00786	0.0521	16
BRCA	cg25305703	8	NA	128378218	rs9297753	8	128375270	T	C	0.405567	-0.00566892	0.00076481	1.24e-13	-0.230477	0.0320049	5.96e-13	0.0245965	0.00476211	2.4e-07	2.4e-07	0.0517	20
BRCA	cg03714773	7	NA	91764589	rs9691343	7	91731402	A	G	0.383698	0.00243576	0.000776808	0.00172	0.352623	0.0331874	2.27e-26	0.00690755	0.00229687	0.00264	0.00906	0.0507	20
BRCA	cg18145759	2	NA	109901466	rs138696217	2	109871179	A	C	0.0159046	-0.0188694	0.00698371	0.00689	2.15351	0.211122	1.98e-24	-0.00876216	0.00335478	0.00901	0.00901	0.0506	3
BRCA	cg12474798	10	NA	64565772	rs1848797	10	64552934	G	A	0.363817	0.00229616	0.000772169	0.00294	-0.265151	0.032893	7.57e-16	-0.00865982	0.00310402	0.00527	0.00334	0.0505	20
BRCA	cg26897904	11	NA	1892142	rs61868776	11	1890321	T	C	0.256461	0.00323687	0.000851996	0.000145	0.25573	0.0371865	6.11e-12	0.0126574	0.00380622	0.000883	0.00324	0.0504	13
BRCA	cg21449646	8	NA	19465636	rs12542189	8	19465619	C	T	0.301193	0.00208558	0.000811145	0.0101	-0.35794	0.0351859	2.62e-24	-0.00582662	0.00233741	0.0127	0.00785	0.0503	20
BRCA	cg02032097	3	NA	46755916	rs80314031	3	46770480	G	C	0.0208748	-0.00849584	0.00236384	0.000326	-1.0718	0.0943629	6.75e-30	0.0079267	0.00231327	0.000611	0.00443	0.05	20
