# Supplementary material for: Mendelian Randomization Analysis of the Relationship between Neurotransmitter-Related Genes and Cancer: Insights from Multi-omics Data
Source: Research Square preprint supplement (doi:10.21203/rs.3.rs-6036757/v1), 2025-04-24
Supplement: Supplementary file 4 [file 73740f0c2e4bd5fff843e4ac.xlsx]

## Sheet: m_b_smr_mr
EXP	OUT	presso_IVW	presso_MR_Egger	presso_Q_pval_Egger	presso_Q_pval_IVW	presso_Simple_mode	presso_Weighted_median	presso_Weighted_mode	Outco_ID	Expo_Chr	Expo_Gene	Expo_bp	Outco_Chr	Outco_Gene	Outco_bp	topSNP	topSNP_chr	topSNP_bp	A1	A2	Freq	b_Outco	se_Outco	p_Outco	b_Expo	se_Expo	p_Expo	b_SMR	se_SMR	p_SMR	p_SMR_multi	p_HEIDI	nsnp_HEIDI	adjust_p	gene_name
cg24674445	ENSG00000163463	6.10729e-31	0.367722	0.79695	0.0774727	0.000185158	6.75674e-19	0.000129189	ENSG00000163463	1		156076363	1	ENSG00000163463	155150815	rs915179	1	156078249	G	A	0.383698	-0.0344698	0.00812241	2.1977e-05	1.099	0.0240226	0	-0.0313647	0.00742246	2.38248e-05	1.20996e-08	0.274452	20	3.62988e-08	KRTCAP2
cg16269418	ENSG00000143630	2.1541e-10	0.97919	0.0180083	0.00893124	0.0163248	2.3454e-09	0.0126156	ENSG00000143630	1		155043883	1	ENSG00000143630	155253506	rs3766916	1	155049402	T	C	0.40159	0.0141774	0.0120761	0.240395	0.378011	0.0325375	3.35095e-31	0.0375052	0.0321092	0.242786	0.00141632	0.0695703	20	0.00141632	HCN3
