# Supplementary material for: Mendelian Randomization Analysis of the Relationship between Neurotransmitter-Related Genes and Cancer: Insights from Multi-omics Data
Source: Research Square preprint supplement (doi:10.21203/rs.3.rs-6036757/v1), 2025-04-24
Supplement: Supplementary file 5 [file b09bf7ea38a4675df3f6969a.xlsx]

## Sheet: blood_smr_adj
Outco_ID	probeID	ProbeChr	Gene	Probe_bp	topSNP	topSNP_chr	topSNP_bp	A1	A2	Freq	b_GWAS	se_GWAS	p_GWAS	b_eQTL	se_eQTL	p_eQTL	b_SMR	se_SMR	p_SMR	p_SMR_multi	p_HEIDI	nsnp_HEIDI	gene_name
BRCA	ENSG00000167074	22	ENSG00000167074	41779333	rs4822025	22	41776646	C	G	0.233598	0.00122773	0.000907866	0.176271	0.536022	0.00916291	0	0.00229045	0.00169416	0.176387	0.000230137	0.137956	20	TEF
BRCA	ENSG00000104687	8	ENSG00000104687	30560513	rs3594	8	30535660	A	C	0.406561	-0.00200703	0.000783439	0.0104125	0.394374	0.00798361	0	-0.00508915	0.00198921	0.010516	0.000362481	0.0523883	20	GSR
BRCA	ENSG00000172216	20	ENSG00000172216	48808294	rs1889236	20	48905967	T	C	0.246521	-0.000689589	0.000897675	0.442372	-0.146691	0.00918009	1.7842e-57	0.00470098	0.00612658	0.442898	0.000731415	0.0157416	20	CEBPB
BRCA	ENSG00000170606	5	ENSG00000170606	132414897	rs72801474	5	132444128	A	G	0.0685885	-0.0003509	0.00131008	0.788818	-0.523833	0.0148771	1.3763e-271	0.00066987	0.00250102	0.788824	0.00219957	0.0189663	20	HSPA4
BRCA	ENSG00000101350	20	ENSG00000101350	30894140	rs6119771	20	30770375	C	G	0.408549	0.00225499	0.000766877	0.00327699	0.0546914	0.00801222	8.73152e-12	0.0412312	0.0152676	0.00692207	0.00506192	0.779463	20	KIF3B
BRCA	ENSG00000147889	9	ENSG00000147889	21981525	rs2188127	9	21965232	G	C	0.141153	0.000987621	0.00109427	0.366771	0.122487	0.0129167	2.47551e-21	0.00806307	0.00897414	0.368931	0.00521915	0.0508258	18	CDKN2A
BRCA	ENSG00000154274	4	ENSG00000154274	37540340	rs3849016	4	37648708	A	G	0.356859	-0.00245803	0.000802298	0.00218591	-0.0664332	0.0083056	1.2584e-15	0.037	0.0129324	0.00422256	0.00745411	0.445434	20	C4orf19
BRCA	ENSG00000105974	7	ENSG00000105974	116183036	rs1997276	7	115978317	T	A	0.173956	0.00225038	0.000975672	0.0210831	0.0920863	0.0104073	8.89419e-19	0.0244377	0.0109493	0.025621	0.00793996	0.593337	20	CAV1
BRCA	ENSG00000143630	1	ENSG00000143630	155253506	rs2297480	1	155279482	G	T	0.263419	0.0030764	0.000868733	0.000398237	-0.127112	0.0151184	4.17772e-17	-0.0242022	0.00741583	0.00110012	0.00807524	0.0995328	20	HCN3
BRCA	ENSG00000143337	1	ENSG00000143337	179869794	rs571822	1	179914561	G	A	0.292247	0.00149334	0.000829899	0.0719517	0.113205	0.0131667	8.12593e-18	0.0131915	0.00748979	0.0781938	0.0087869	0.770867	20	TOR1AIP1
BRCA	ENSG00000104341	8	ENSG00000104341	98826263	rs111570463	8	98775526	T	C	0.144135	-0.000102699	0.00106077	0.922873	-0.650068	0.011438	0	0.000157982	0.00163178	0.922873	0.00923179	0.052005	20	LAPTM4B
BRCA	ENSG00000115993	2	ENSG00000115993	202279116	rs10931945	2	202271124	T	C	0.496024	-0.000630448	0.000763598	0.409015	-0.0515651	0.00803971	1.4194e-10	0.0122263	0.0149306	0.41286	0.0100563	0.144572	15	TRAK2
BRCA	ENSG00000147649	8	ENSG00000147649	98698702	rs117515213	8	98614106	A	G	0.027833	-0.00429441	0.00223117	0.0542626	0.299301	0.0230967	2.10051e-38	-0.0143481	0.00753638	0.0569299	0.0104783	0.0464887	20	MTDH
BRCA	ENSG00000163463	1	ENSG00000163463	155150815	rs12752585	1	155135406	A	G	0.49503	0.00176572	0.000756741	0.0196313	-0.0651913	0.00796123	2.64281e-16	-0.0270852	0.0120701	0.0248325	0.0112189	0.261427	20	KRTCAP2
BRCA	ENSG00000155760	2	ENSG00000155760	202901235	rs13034579	2	202901279	T	G	0.292247	-0.0024605	0.000812106	0.00244734	0.0742146	0.0087377	2.00331e-17	-0.0331539	0.011618	0.00432193	0.0145661	0.906638	20	FZD7
BRCA	ENSG00000140459	15	ENSG00000140459	74645090	rs4278698	15	74664951	T	C	0.162028	-0.00156569	0.00108982	0.150817	0.0826582	0.0113735	3.65929e-13	-0.0189417	0.0134398	0.158724	0.0156251	0.605343	20	CYP11A1
BRCA	ENSG00000131238	1	ENSG00000131238	40550877	rs10889147	1	40561471	C	T	0.110338	-0.000456918	0.00122425	0.708983	-1.20536	0.0102914	0	0.00037907	0.00101567	0.708984	0.0175256	0.912871	20	PPT1
BRCA	ENSG00000188641	1	ENSG00000188641	97964952	rs12043021	1	97862725	T	G	0.196819	0.00179995	0.00094365	0.0564644	-0.332581	0.0104906	1.4261e-220	-0.00541206	0.00284248	0.0569114	0.0196288	0.837246	20	DPYD
BRCA	ENSG00000160325	9	ENSG00000160325	136330529	rs28680325	9	136316367	A	C	0.333996	-0.000759444	0.000788822	0.335669	0.181396	0.00983228	5.31187e-76	-0.00418667	0.00435454	0.336326	0.0205043	0.554667	20	CACFD1
BRCA	ENSG00000139410	12	ENSG00000139410	113868061	rs734070	12	113859451	A	G	0.0357853	-0.00437143	0.00201708	0.0302191	0.759265	0.0213722	1.9649e-276	-0.00575745	0.00266156	0.0305269	0.0210326	0.19732	20	SDSL
BRCA	ENSG00000084676	2	ENSG00000084676	24854177	rs12474954	2	24698756	T	C	0.482107	-0.000913041	0.000762769	0.231303	0.164356	0.00803438	5.24718e-93	-0.00555526	0.00464889	0.232101	0.0213292	0.487023	20	NCOA1
BRCA	ENSG00000138031	2	ENSG00000138031	25092373	rs62140562	2	25021037	C	G	0.295229	0.000969143	0.000831529	0.243819	0.120315	0.00941521	2.15372e-37	0.00805504	0.00693995	0.245773	0.0223969	0.459935	20	ADCY3
BRCA	ENSG00000075340	2	ENSG00000075340	70915053	rs10164951	2	70894426	T	A	0.39165	0.000519684	0.000779577	0.505013	-0.143143	0.00813957	3.15366e-69	-0.00363053	0.00545007	0.505319	0.0260647	0.248973	20	ADD2
BRCA	ENSG00000157152	3	ENSG00000157152	12139388	rs310766	3	12233482	A	G	0.240557	-0.000915418	0.000872801	0.294257	-0.195456	0.00907092	5.5762e-103	0.00468349	0.00447074	0.294829	0.026498	0.120706	20	SYN2
BRCA	ENSG00000117984	11	ENSG00000117984	1779602	rs187312763	11	1737957	A	G	0.0258449	-0.00230701	0.00261834	0.378266	-0.555971	0.0380348	2.1755e-48	0.00414952	0.00471804	0.37913	0.0267267	0.352639	12	CTSD
BRCA	ENSG00000186891	1	ENSG00000186891	1140479	rs3813201	1	1151232	C	T	0.131213	0.00177394	0.00105853	0.0937671	-0.373647	0.013369	6.8173e-172	-0.00474764	0.00283806	0.0943573	0.0274259	0.0813329	20	TNFRSF18
BRCA	ENSG00000136826	9	ENSG00000136826	110249948	rs77233150	9	110429664	G	A	0.0487078	-0.00147545	0.00161027	0.359523	0.104037	0.0173992	2.2396e-09	-0.014182	0.0156586	0.365093	0.0295776	0.177355	11	KLF4
BRCA	ENSG00000198794	15	ENSG00000198794	75281698	rs74023908	15	75310710	C	T	0.0864811	0.000359027	0.00147953	0.808267	0.100184	0.0135088	1.2053e-13	0.00358369	0.0147761	0.808367	0.0333657	0.156527	18	SCAMP5
BRCA	ENSG00000170558	18	ENSG00000170558	25644170	rs17446875	18	25728693	A	G	0.218688	0.000228061	0.000886916	0.797071	-0.510905	0.00915658	0	-0.000446386	0.00173599	0.797073	0.0356152	0.158589	20	CDH2
BRCA	ENSG00000184117	22	ENSG00000184117	29964061	rs2530669	22	30044669	A	G	0.517893	0.00109346	0.000756762	0.148481	-0.295703	0.00782064	0	-0.00369783	0.00256107	0.148777	0.0359829	0.644139	20	NIPSNAP1
BRCA	ENSG00000106617	7	ENSG00000106617	151413703	rs6963427	7	151254828	C	T	0.32008	0.00140988	0.000799235	0.0777258	0.201831	0.00880641	3.0317e-116	0.00698546	0.00397164	0.0786056	0.0367991	0.245257	20	PRKAG2
BRCA	ENSG00000180914	3	ENSG00000180914	8801704	rs171029	3	8982481	G	A	0.264414	-0.00237701	0.000819871	0.00374058	0.0787972	0.00860983	5.58887e-20	-0.0301662	0.0109144	0.00571187	0.0369846	0.642377	20	OXTR
BRCA	ENSG00000204516	6	ENSG00000204516	31470779	rs7757162	6	31478960	A	G	0.0467197	0.0018945	0.00191077	0.321449	-1.2761	0.0312665	0	-0.0014846	0.00149779	0.321591	0.0400794	0.727244	20	MICB
BRCA	ENSG00000172260	1	ENSG00000172260	72308521	rs10789340	1	72940273	A	G	0.33499	0.00161638	0.000782476	0.0388545	-0.404076	0.011814	2.1745e-256	-0.00400019	0.00193999	0.0392108	0.0401143	0.145364	20	NEGR1
BRCA	ENSG00000204525	6	ENSG00000204525	31238216	rs9264547	6	31234742	C	G	0.191849	-0.00144186	0.000930277	0.121159	0.735868	0.00979082	0	-0.0019594	0.00126446	0.121238	0.0435963	0.0871708	20	HLA-C
BRCA	ENSG00000115902	2	ENSG00000115902	65233305	rs1861443	2	65218647	A	G	0.143141	-1.45534e-05	0.00113288	0.98975	0.518008	0.0117815	0	-2.80949e-05	0.00218699	0.98975	0.0436174	0.0967314	20	SLC1A4
BRCA	ENSG00000169398	8	ENSG00000169398	141840157	rs10088133	8	142017877	A	G	0.459245	-0.000722246	0.000771717	0.349327	-0.164576	0.00800196	5.42181e-94	0.00438852	0.00469397	0.349826	0.043844	0.614285	20	PTK2
BRCA	ENSG00000087191	17	ENSG00000087191	61906945	rs2597632	17	61894739	T	A	0.327038	-0.00144133	0.000804321	0.0731356	0.173774	0.0124379	2.33e-44	-0.00829426	0.00466645	0.0754987	0.0442756	0.330925	20	PSMC5
BRCA	ENSG00000111716	12	ENSG00000111716	21849533	rs138560021	12	21810834	A	G	0.0248509	-0.00785966	0.00286985	0.00616825	-0.304299	0.0463234	5.06539e-11	0.0258288	0.0102178	0.0114776	0.0447692	0.313446	7	LDHB
BRCA	ENSG00000133703	12	ENSG00000133703	25380796	rs11047909	12	25384838	A	G	0.412525	0.00169269	0.000769648	0.0278563	-0.0689514	0.00797531	5.35231e-18	-0.024549	0.0115177	0.0330544	0.0453104	0.301423	20	KRAS
BRCA	ENSG00000127528	19	ENSG00000127528	16437156	rs501537	19	16425503	A	G	0.416501	0.0009721	0.000778345	0.21169	0.0903729	0.00829688	1.2529e-27	0.0107565	0.00866902	0.214679	0.0463771	0.267419	20	KLF2
BRCA	ENSG00000049246	1	ENSG00000049246	7874808	rs666068	1	7970383	C	T	0.0238569	0.00337329	0.00282156	0.231876	1.18578	0.0271132	0	0.0028448	0.0023804	0.23205	0.0496241	0.760807	19	PER3
