# Supplementary material for: Mendelian Randomization Analysis of the Relationship between Neurotransmitter-Related Genes and Cancer: Insights from Multi-omics Data
Source: Research Square preprint supplement (doi:10.21203/rs.3.rs-6036757/v1), 2025-04-24
Supplement: Supplementary file 6 [file b414433ac79ac26bd24b4d87.xlsx]

## Sheet: mqtl_smr_mr
EXP	OUT	radial_IVW	radial_MR_Egger	radial_Q_pval_Egger	radial_Q_pval_IVW	radial_Simple_mode	radial_Weighted_median	radial_Weighted_mode	Outco_ID	ProbeChr	Probe_bp	topSNP	topSNP_chr	topSNP_bp	A1	A2	Freq	b_GWAS	se_GWAS	p_GWAS	b_eQTL	se_eQTL	p_eQTL	b_SMR	se_SMR	p_SMR	p_SMR_multi	p_HEIDI	nsnp_HEIDI
cg06211724	BRCA	0.131285	0.240513	0.0817603	0.0829483	0.739103	0.644746	0.756991	BRCA	1	183155437	rs2276543	1	183155305	A	G	0.293241	0.000299203	0.000845063	0.723	-0.357945	0.0362784	5.81e-23	-0.000835891	0.00236239	0.723	0.00158	0.0635	20
cg16528597	BRCA	0.727203	0.943403	0.0717598	0.135074	0.811567	0.433322	0.667132	BRCA	1	145013480	rs10494240	1	145551515	G	A	0.328032	0.00235992	0.000799313	0.00315	-0.368693	0.0340228	2.31e-27	-0.00640077	0.00224699	0.00439	0.00372	0.616	14
cg10196558	BRCA	3.65e-07	0.114891	0.923177	0.14288	0.201798	0.00944043	0.0617927	BRCA	1	155043921	rs3766916	1	155049402	T	C	0.40159	-0.00101901	0.000767894	0.185	0.337841	0.0329898	1.3e-24	-0.00301624	0.00229195	0.188	0.00431	0.0636	20
cg04218899	BRCA	0.00342251	0.730477	0.132579	0.187952	0.114543	0.0218012	0.112008	BRCA	1	183155366	rs2276543	1	183155305	A	G	0.293241	0.000299203	0.000845063	0.723	-0.366912	0.0364503	7.8e-24	-0.000815463	0.0023046	0.723	0.00122	0.0556	20
cg22359828	BRCA	0.062421	0.909363	0.186937	0.229784	0.585874	0.660037	0.735506	BRCA	1	181514216	rs1933049	1	181510739	T	C	0.439364	-2.69e-07	0.000760095	1	-0.332081	0.032162	5.42e-25	8.09e-07	0.00228888	1	0.00957	0.136	15
cg09242541	BRCA	0.144938	0.207277	0.300487	0.325066	0.934013	0.0937731	0.0751843	BRCA	1	10490025	rs524150	1	10492940	G	C	0.493042	-0.00223097	0.000757227	0.00322	-0.628736	0.0309927	1.69e-91	0.00354834	0.001217	0.00355	0.00502	0.0797	20
cg05929019	BRCA	0.0221579	0.296466	0.283744	0.339794	0.605347	0.314412	0.60617	BRCA	1	183155154	rs2276543	1	183155305	A	G	0.293241	0.000299203	0.000845063	0.723	-0.372303	0.0366896	3.4e-24	-0.000803655	0.00227121	0.723	0.00084	0.0541	20
cg11405475	BRCA	0.000433259	0.14069	0.340004	0.397864	0.219754	0.0220314	0.10633	BRCA	1	203830200	rs60622947	1	203852963	T	C	0.241551	-0.00147774	0.000898141	0.0999	0.527774	0.0380223	8.3e-44	-0.00279995	0.00171367	0.102	0.00363	0.322	20
cg02895948	BRCA	2.2e-16	0.778017	0.837087	0.488986	6.21e-05	4.45e-07	0.00774504	BRCA	1	208204062	rs3811386	1	208204399	G	T	0.402584	-0.00190679	0.000764138	0.0126	0.573432	0.0304275	3.18e-79	-0.00332522	0.0013442	0.0134	0.00353	0.194	20
cg24591105	BRCA	0.0587626	0.146664	0.565068	0.572072	0.125229	0.0153593	0.0353672	BRCA	1	230415225	rs6698963	1	230415025	G	A	0.455268	-0.00151633	0.000757965	0.0454	-0.412306	0.0321513	1.2e-37	0.00367768	0.00186059	0.0481	0.00927	0.281	20
cg15208524	BRCA	3.73e-10	0.390254	0.601394	0.602461	0.129609	9.08e-05	0.0149346	BRCA	1	10270712	rs61784580	1	10270496	A	G	0.282306	-0.0023002	0.000845549	0.00652	0.667284	0.0324542	6.16e-94	-0.00344711	0.00127819	0.007	0.0034	0.457	20
cg24674445	BRCA	1.15e-06	0.702076	0.774576	0.609899	0.256829	0.0194753	0.0312899	BRCA	1	156076363	rs915179	1	156078249	G	A	0.383698	0.000673597	0.000769608	0.381	1.099	0.0240226	0	0.000612918	0.000700408	0.382	0.00311	0.253	20
cg16269418	BRCA	3.8e-06	0.241861	0.977398	0.612251	0.155667	0.0186	0.0754903	BRCA	1	155043883	rs3766916	1	155049402	T	C	0.40159	-0.00101901	0.000767894	0.185	0.378011	0.0325375	3.35e-31	-0.00269572	0.00204462	0.187	0.00609	0.373	20
cg24371574	BRCA	0.470629	0.585876	0.610264	0.623861	0.356126	0.894693	0.794004	BRCA	1	230428167	rs6689887	1	230419152	T	C	0.501988	0.000494897	0.000760102	0.515	-0.431151	0.0317345	4.84e-42	-0.00114785	0.00176498	0.515	0.00645	0.0554	20
cg05040210	BRCA	1.79e-08	0.452794	0.855854	0.644059	0.0582822	0.00054232	0.00326284	BRCA	1	18807594	rs1360920	1	18805698	T	C	0.151093	-0.00214911	0.0010062	0.0327	-1.05733	0.037479	4.25e-175	0.00203258	0.000954366	0.0332	0.00623	0.303	20
cg25614726	BRCA	0.000276496	0.467855	0.773086	0.745852	0.529452	0.00347616	0.00966737	BRCA	1	10490058	rs524150	1	10492940	G	C	0.493042	-0.00223097	0.000757227	0.00322	-0.494758	0.0313591	4.47e-56	0.00450921	0.00155696	0.00378	0.00507	0.162	20
cg19912559	BRCA	1.69e-16	0.0315737	0.818317	0.752353	0.00845774	1.26e-06	6.39e-05	BRCA	1	40204330	rs7547787	1	40220806	A	G	0.356859	0.00299549	0.000780962	0.000125	0.84267	0.0292442	1.39e-182	0.00355476	0.000934946	0.000143	0.000876	0.917	20
cg12051614	BRCA	2.42e-11	0.317003	0.751838	0.775995	0.0220139	2.94e-05	0.0163392	BRCA	1	40205236	rs12094291	1	40226046	A	G	0.356859	0.00297386	0.000781105	0.000141	0.536718	0.0326205	7.93e-61	0.00554082	0.00149379	0.000208	8.94e-05	0.862	20
cg24293507	BRCA	1.12e-07	0.0413898	0.841255	0.782886	0.027967	2.45e-05	0.0139838	BRCA	1	10511793	rs628462	1	10511544	T	C	0.390656	0.00218803	0.000782357	0.00516	-0.341331	0.0335128	2.31e-24	-0.00641029	0.00237692	0.007	0.00472	0.0588	20
cg13803915	BRCA	0.022533	0.392232	0.728353	0.7935	0.449749	0.0357169	0.0721013	BRCA	1	10490063	rs524150	1	10492940	G	C	0.493042	-0.00223097	0.000757227	0.00322	-0.431513	0.0322874	9.72e-41	0.00517011	0.00179695	0.00401	0.00594	0.176	20
cg21827809	BRCA	0.0119191	0.758668	0.668726	0.810742	0.372961	0.0232462	0.0995098	BRCA	1	3575147	rs12757620	1	3540024	G	T	0.428429	-0.00171566	0.000764528	0.0248	0.300598	0.0333309	1.91e-19	-0.00570749	0.00262091	0.0294	0.00987	0.387	14
cg14356550	BRCA	1.38e-07	0.148238	0.801081	0.821177	0.207669	0.00978516	0.0398082	BRCA	1	18808102	rs61760672	1	18813746	C	T	0.132207	-0.00141195	0.0010789	0.191	-0.752822	0.0438011	3.31e-66	0.00187554	0.00143729	0.192	0.00501	0.628	20
cg10715272	BRCA	9.6e-06	0.377472	0.821416	0.84825	0.0301196	0.000438924	0.151148	BRCA	1	39981410	rs79473113	1	40020020	A	C	0.0407555	-0.00286587	0.00187487	0.126	0.610542	0.0830715	1.99e-13	-0.00469398	0.00313654	0.135	0.00192	0.623	5
cg11296826	BRCA	9.22e-06	0.353692	0.836723	0.857157	0.0258927	0.00349608	0.0181454	BRCA	1	40236125	rs79473113	1	40020020	A	C	0.0407555	-0.00286587	0.00187487	0.126	0.59623	0.0832632	8.02e-13	-0.00480665	0.00321539	0.135	0.00136	0.672	5
cg11534596	BRCA	7.49e-08	0.358322	0.921903	0.886119	0.118388	0.00573064	0.0420742	BRCA	1	17574720	rs2977229	1	17576706	C	T	0.295229	0.00131984	0.0008312	0.112	-0.715772	0.0328308	2.23e-105	-0.00184394	0.00116434	0.113	0.00893	0.932	20
cg11504517	BRCA	9.05e-05	0.298771	0.8406	0.897828	0.177278	0.00409055	0.0605366	BRCA	1	3569899	rs12757620	1	3540024	G	T	0.428429	-0.00171566	0.000764528	0.0248	0.41377	0.0330608	6.15e-36	-0.00414641	0.00187718	0.0272	0.00333	0.739	20
cg24373253	BRCA	2.46e-06	0.72092	0.950963	0.908585	0.0155922	0.0215776	0.0381109	BRCA	1	99469634	rs3913779	1	99573292	A	G	0.498012	-0.00109913	0.000759987	0.148	-0.807105	0.0288942	1.06e-171	0.00136182	0.000942882	0.149	0.00982	0.598	20
cg14278614	BRCA	4.16e-18	0.00403389	0.893431	0.919102	3.78e-05	7.11e-11	6.59e-05	BRCA	1	7740806	rs34535455	1	7740810	A	G	0.158052	-0.00288961	0.00102418	0.00478	-0.768288	0.0419402	5.88e-75	0.0037611	0.00134879	0.0053	0.00746	0.233	20
cg03593336	BRCA	3.58e-06	0.284533	0.918068	0.925809	0.0550599	0.0175206	0.0390892	BRCA	1	99471295	rs3913779	1	99573292	A	G	0.498012	-0.00109913	0.000759987	0.148	-0.790394	0.0293479	9.3e-160	0.00139061	0.000962915	0.149	0.00635	0.796	20
cg23052055	BRCA	0.000962668	0.112272	0.924566	0.942101	0.0605632	0.00849964	0.0310961	BRCA	1	3606042	rs3765761	1	3630476	T	C	0.164016	-0.00172621	0.000981717	0.0787	0.567023	0.0423417	6.77e-41	-0.00304434	0.00174621	0.0813	0.00782	0.652	10
cg01860897	BRCA	0.203633	0.795936	0.892339	0.945843	0.469224	0.380825	0.489607	BRCA	1	90309605	rs7542239	1	90312742	G	A	0.256461	-0.00063391	0.000855432	0.459	0.565825	0.0359116	6.24e-56	-0.00112033	0.0015135	0.459	0.0087	0.5	8
cg26034531	BRCA	1.34e-05	0.387172	0.960726	0.956817	0.00998712	0.0129983	0.0246082	BRCA	1	99469577	rs3913779	1	99573292	A	G	0.498012	-0.00109913	0.000759987	0.148	-0.780532	0.0293305	4.98e-156	0.00140818	0.000975115	0.149	0.00749	0.634	20
cg24920358	BRCA	2.34e-15	0.0532333	0.954721	0.962	0.0138286	6.83e-07	0.00382784	BRCA	1	40204285	rs56064244	1	40213890	T	C	0.356859	0.0029978	0.000780803	0.000123	0.842063	0.029238	2.13e-182	0.00356007	0.000935453	0.000141	0.000309	0.73	20
cg14159342	BRCA	0.08668	0.833824	0.936156	0.96306	0.311355	0.115395	0.288867	BRCA	1	3624292	rs1122723	1	3594105	G	A	0.416501	-0.00233117	0.00076324	0.00226	-0.313247	0.0325579	6.5e-22	0.00744195	0.00255637	0.0036	0.00442	0.199	6
cg23228279	BRCA	8.01e-16	0.0372329	0.967415	0.974303	0.00019224	3.56e-09	8.15e-05	BRCA	1	7757374	rs3011928	1	7752828	A	G	0.455268	0.00234131	0.000762995	0.00215	0.580862	0.0310063	2.63e-78	0.00403075	0.00133106	0.00246	0.0049	0.617	20
cg11211040	BRCA	0.00262544	0.132693	0.961196	0.974881	0.0516477	0.0200479	0.061186	BRCA	1	40766357	rs17462950	1	40765549	T	C	0.0755467	-0.0022474	0.00122283	0.0661	0.944581	0.0498364	4.12e-80	-0.00237926	0.00130065	0.0674	0.00394	0.773	20
cg07703391	BRCA	3.21e-21	5.99e-06	0.998676	0.999082	0.00359234	7.84e-09	3.16e-08	BRCA	1	40226045	rs7547787	1	40220806	A	G	0.356859	0.00299549	0.000780962	0.000125	-1.32922	0.0146062	0	-0.00225357	0.000588056	0.000127	0.00274	0.441	20
