# Supplementary material for: Mendelian Randomization Analysis of the Relationship between Neurotransmitter-Related Genes and Cancer: Insights from Multi-omics Data
Source: Research Square preprint supplement (doi:10.21203/rs.3.rs-6036757/v1), 2025-04-24
Supplement: Supplementary file 7 [file bd13348db3427a85ae3fc3da.xlsx]

## Sheet: blood_mr_smr
EXP	OUT	presso_IVW	presso_MR_Egger	presso_Q_pval_Egger	presso_Q_pval_IVW	presso_Simple_mode	presso_Weighted_median	presso_Weighted_mode	radial_IVW	radial_MR_Egger	radial_Q_pval_Egger	radial_Q_pval_IVW	radial_Simple_mode	radial_Weighted_median	radial_Weighted_mode	Outco_ID	ProbeChr	Gene	Probe_bp	topSNP	topSNP_chr	topSNP_bp	A1	A2	Freq	b_GWAS	se_GWAS	p_GWAS	b_eQTL	se_eQTL	p_eQTL	b_SMR	se_SMR	p_SMR	p_SMR_multi	p_HEIDI	nsnp_HEIDI	gene_name
ENSG00000049246	BRCA	2.63478e-09	0.282814	0.0972874	0.0480919	0.0110877	3.46039e-06	0.0374068	3.27353e-11	0.0540365	0.770493	0.722322	0.0041344	6.23078e-06	0.0175713	BRCA	1	ENSG00000049246	7874808	rs666068	1	7970383	C	T	0.0238569	0.00337329	0.00282156	0.231876	1.18578	0.0271132	0	0.0028448	0.0023804	0.23205	0.0496241	0.760807	19	PER3
ENSG00000186891	BRCA	0.181677	0.524463	0.000166478	9.02439e-05	0.789058	0.0953257	0.167754	0.0782597	0.659475	0.152092	0.124747	0.923046	0.0957545	0.168331	BRCA	1	ENSG00000186891	1140479	rs3813201	1	1151232	C	T	0.131213	0.00177394	0.00105853	0.0937671	-0.373647	0.013369	6.8173e-172	-0.00474764	0.00283806	0.0943573	0.0274259	0.0813329	20	TNFRSF18
ENSG00000131238	BRCA	0.0487597	0.762941	4.62315e-05	2.55137e-05	0.388105	0.115331	0.0611166	0.00784664	0.222746	0.957952	0.954691	0.396451	0.119369	0.0890941	BRCA	1	ENSG00000131238	40550877	rs10889147	1	40561471	C	T	0.110338	-0.000456918	0.00122425	0.708983	-1.20536	0.0102914	0	0.00037907	0.00101567	0.708984	0.0175256	0.912871	20	PPT1
ENSG00000172260	BRCA	9.30303e-11	0.421147	0.282831	0.0863782	0.00940619	6.76688e-06	0.000311053	2.98522e-15	0.0286857	0.969307	0.926538	0.00966136	2.92253e-06	0.000469225	BRCA	1	ENSG00000172260	72308521	rs10789340	1	72940273	A	G	0.33499	0.00161638	0.000782476	0.0388545	-0.404076	0.011814	2.1745e-256	-0.00400019	0.00193999	0.0392108	0.0401143	0.145364	20	NEGR1
ENSG00000188641	BRCA	1.58086e-10	4.61248e-07	0.237473	0.188419	0.0126359	6.50496e-08	2.70107e-06	1.69763e-10	1.42243e-06	0.938753	0.922132	0.00393294	1.44606e-08	4.55323e-06	BRCA	1	ENSG00000188641	97964952	rs12043021	1	97862725	T	G	0.196819	0.00179995	0.00094365	0.0564644	-0.332581	0.0104906	1.4261e-220	-0.00541206	0.00284248	0.0569114	0.0196288	0.837246	20	DPYD
ENSG00000143337	BRCA	0.00654392	0.406794	0.00674154	0.0122163	0.0877324	0.0017942	0.0594655	7.37049e-06	0.0763707	0.823708	0.796849	0.0856493	0.0013502	0.0643382	BRCA	1	ENSG00000143337	179869794	rs571822	1	179914561	G	A	0.292247	0.00149334	0.000829899	0.0719517	0.113205	0.0131667	8.12593e-18	0.0131915	0.00748979	0.0781938	0.0087869	0.770867	20	TOR1AIP1
ENSG00000143630	BRCA	1.66102e-10	0.685538	0.609902	0.186259	0.0197874	8.54959e-07	0.00990159	5.53767e-15	0.327078	0.664687	0.511726	0.020178	1.26589e-06	0.00765622	BRCA	1	ENSG00000143630	155253506	rs2297480	1	155279482	G	T	0.263419	0.0030764	0.000868733	0.000398237	-0.127112	0.0151184	4.17772e-17	-0.0242022	0.00741583	0.00110012	0.00807524	0.0995328	20	HCN3
