# Supplementary material for: Mendelian Randomization Analysis of the Relationship between Neurotransmitter-Related Genes and Cancer: Insights from Multi-omics Data
Source: Research Square preprint supplement (doi:10.21203/rs.3.rs-6036757/v1), 2025-04-24
Supplement: Supplementary file 8 [file d0e9f550d78b59714d06739c.xlsx]

## Sheet: Sheet1
exposure
Schizophrenia	ieu-a-22	https://gwas.mrcieu.ac.uk/datasets/ieu-a-22/
Alcohol dependence	ieu-a-813	https://gwas.mrcieu.ac.uk/datasets/ieu-a-813/
Bipolar disorder	ieu-b-41	https://gwas.mrcieu.ac.uk/datasets/ieu-b-41/
Schizophrenia	ieu-b-42	https://gwas.mrcieu.ac.uk/datasets/ieu-b-42/
Alzheimer's disease	ieu-b-5067	https://gwas.mrcieu.ac.uk/datasets/ieu-b-5067/
Generalized epilepsy	ieu-b-9	https://gwas.mrcieu.ac.uk/datasets/ieu-b-9/
Depression	ukb-b-12064	https://gwas.mrcieu.ac.uk/datasets/ukb-b-12064/
Anxiety	ukb-b-17243	https://gwas.mrcieu.ac.uk/datasets/ukb-b-17243/
Mania	ukb-b-6906	https://gwas.mrcieu.ac.uk/datasets/ukb-b-6906/
Social anxiety	ukb-d-20544_1	https://gwas.mrcieu.ac.uk/datasets/ukb-d-20544_1/
outcome
Bladder cancer	ieu-b-4874	https://gwas.mrcieu.ac.uk/datasets/ieu-b-4874 /
Prostate Cancer	ukb-b-18843	https://gwas.mrcieu.ac.uk/datasets/ukb-b-18843 /
Melanoma	ukb-b-12915	https://gwas.mrcieu.ac.uk/datasets/ukb-b-12915/
Ovarian Cancer	ieu-b-4963	https://gwas.mrcieu.ac.uk/datasets/ieu-b-4963/
Head and Neck Cancer	ieu-b-4912	https://gwas.mrcieu.ac.uk/datasets/ieu-b-4912 /
Oropharyngeal Cancer	ieu-b-4968	https://gwas.mrcieu.ac.uk/datasets/ieu-b-4968 /
Lung Cancer	ukb-b-20176	https://gwas.mrcieu.ac.uk/datasets/ukb-b-20176/
Thyroid cancer	ieu-a-1082	https://gwas.mrcieu.ac.uk/datasets/ieu-a-1082 /
Breast Cancer	ieu-a-1129	https://gwas.mrcieu.ac.uk/datasets/ieu-a-1129 /
Skin Cancer	ukb-b-12339	https://gwas.mrcieu.ac.uk/datasets/ukb-b-12339/
Colorectal cancer	ieu-b-4965	https://gwas.mrcieu.ac.uk/datasets/ieu-b-4965/
endometrial cancer	ukb-b-13545	https://gwas.mrcieu.ac.uk/datasets/ukb-b-13545/
Cervical cance	ukb-b-8777	https://gwas.mrcieu.ac.uk/datasets/ukb-b-8777/
Gallbladder cancer	ieu-a-1057	https://gwas.mrcieu.ac.uk/datasets/ieu-a-1057/
